# Supplementary material for: Harnessing the reactivity of ortho-formyl-arylketones: base-promoted regiospecific synthesis of functionalized isoquinolines
Source: Royal Society of Chemistry journal article supplement (doi:10.1039/c9cc03689j), 2019-01-01
Supplement: c9cc03689j1.pdf [file c9cc03689j1.pdf]

## Supporting Information

### **Harnessing the Reactivity of *ortho*-Formyl-arylketones: Base-Promoted Regiospecific Synthesis of Functionalized Isoquinolines**

Pawan K. Mishra, Shalini Verma, Manoj Kumar, Ankit kumar and Akhilesh K. Verma\*

Synthetic Organic Chemistry Research Laboratory, Department of Chemistry, University of Delhi, Delhi-110007, India

| <b>S.No</b> | <b>Contents</b>                                                                                  | <b>Page No.</b> |
|-------------|--------------------------------------------------------------------------------------------------|-----------------|
| 1           | X-Ray Crystallographic Studies ( <b>4q</b> ) and <b>5a</b> and References                        | S2–S5           |
| 2           | General Experimental procedure                                                                   | S6–S6           |
| 3           | Optimization of reaction condition                                                               | S6–S7           |
| 4           | General Procedure for the Synthesis of Hydrazides derivatives <b>13a–s</b>                       | S7–S11          |
| 5           | General Procedure for the Synthesis of 2-formylketones <b>1a–s</b> and references                | S11–S16         |
| 6           | General Procedure for the Synthesis of functionalized isoquinolines <b>3a–o</b> and <b>4a–r</b>  | S17–S27         |
| 7           | General Procedure for the Synthesis of functionalized Benzo[ <i>h</i> ]isoquinolines <b>5a–j</b> | S27–S31         |
| 8           | General Procedure for the Synthesis of 3-alkynyl and alkenyl isoquinolines <b>6a–c</b>           | S31–S32         |
| 9           | General Procedure for the Synthesis of 1,3/1,4-Bis-isoquinolines <b>7a–e</b> .                   | S32–S34         |
| 10          | Functionalization of 3-alkynylisoquinolines ( <b>8a–b</b> )                                      | S34–S34         |
| 11          | Control Experimental                                                                             | S35–S35         |
| 12          | Copies of <sup>1</sup> H, <sup>13</sup> C NMR and HRMS                                           | S36–S285        |

## X-Ray Crystallographic Studies



**Figure I.** ORTEP structure of compound **4p**: CCDC Number 1900529

|                        |                                                                                                                                |
|------------------------|--------------------------------------------------------------------------------------------------------------------------------|
| Identification code    | <b>4p</b>                                                                                                                      |
| Empirical formula      | C <sub>24</sub> H <sub>18</sub> N <sub>2</sub>                                                                                 |
| Formula weight         | 334.40                                                                                                                         |
| Temperature            | 160(2) K                                                                                                                       |
| Wavelength             | 0.71073 Å                                                                                                                      |
| Crystal system         | Monoclinic                                                                                                                     |
| Space group            | <i>P</i> 2 <sub>1</sub> / <i>n</i>                                                                                             |
| Unit cell dimensions   | <i>a</i> = 9.304(6) Å $\alpha$ = 90°.<br><i>b</i> = 12.635(6) Å $\beta$ = 99.29(4)°.<br><i>c</i> = 14.949(7) Å $\gamma$ = 90°. |
| Volume                 | 1734.2(16) Å <sup>3</sup>                                                                                                      |
| <i>Z</i>               | 4                                                                                                                              |
| Density (calculated)   | 1.281 g/cm <sup>3</sup>                                                                                                        |
| Absorption coefficient | 0.075 mm <sup>-1</sup>                                                                                                         |
| <i>F</i> (000)         | 704                                                                                                                            |

|                                   |                                             |
|-----------------------------------|---------------------------------------------|
| Crystal size                      | 0.06 x 0.03 x 0.02 mm <sup>3</sup>          |
| Theta range for data collection   | 2.122 to 26.175°.                           |
| Index ranges                      | -10<=h<=11, -14<=k<=15, -18<=l<=15          |
| Reflections collected             | 12137                                       |
| Independent reflections           | 3397 [R(int) = 0.0671]                      |
| Completeness to theta = 25.242°   | 99.6 %                                      |
| Absorption correction             | None                                        |
| Refinement method                 | Full-matrix least-squares on F <sup>2</sup> |
| Data / restraints / parameters    | 3397 / 0 / 237                              |
| Goodness-of-fit on F <sup>2</sup> | 0.890                                       |
| Final R indices [I>2sigma(I)]     | R1 = 0.0549, wR2 = 0.1249                   |
| R indices (all data)              | R1 = 0.1475, wR2 = 0.1657                   |
| Extinction coefficient            | 0.030(3)                                    |
| Largest diff. peak and hole       | 0.186 and -0.187 e.Å <sup>-3</sup>          |



**Figure I.** ORTEP structure of compound **5a**

|                                   |                                                                                                                  |
|-----------------------------------|------------------------------------------------------------------------------------------------------------------|
| Identification code               | <b>5a</b>                                                                                                        |
| Empirical formula                 | C <sub>25</sub> H <sub>17</sub> N <sub>1</sub>                                                                   |
| Formula weight                    | 331.39                                                                                                           |
| Temperature                       | 296(2) K                                                                                                         |
| Wavelength                        | 0.71073 Å                                                                                                        |
| Crystal system                    | Triclinic                                                                                                        |
| Space group                       | <i>P</i> –1                                                                                                      |
| Unit cell dimensions              | a = 8.5750(2) Å   α= 102.2380(10)°.<br>b = 9.8132(2) Å   β= 93.9930(10)°.<br>c = 11.2552(2) Å   γ= 110.8450(10)° |
| Volume                            | 854.02(3) Å <sup>3</sup>                                                                                         |
| Z                                 | 2                                                                                                                |
| Density (calculated)              | 1.289 g/cm <sup>3</sup>                                                                                          |
| Absorption coefficient            | 0.074 mm <sup>–1</sup>                                                                                           |
| F(000)                            | 348                                                                                                              |
| Theta range for data collection   | 1.875 to 25.091°.                                                                                                |
| Index ranges                      | –10<=h<=10, –11<=k<=11, –13<=l<=13                                                                               |
| Reflections collected             | 13786                                                                                                            |
| Independent reflections           | 3042 [R(int) = 0.0256]                                                                                           |
| Completeness to theta = 25.091°   | 99.7 %                                                                                                           |
| Absorption correction             | None                                                                                                             |
| Refinement method                 | Full–matrix least–squares on F <sup>2</sup>                                                                      |
| Data / restraints / parameters    | 3042 / 0 / 235                                                                                                   |
| Goodness–of–fit on F <sup>2</sup> | 0.712                                                                                                            |
| Final R indices [I>2sigma(I)]     | R1 = 0.0386, wR2 = 0.1079                                                                                        |
| R indices (all data)              | R1 = 0.0482, wR2 = 0.1202                                                                                        |
| Extinction coefficient            | n/a                                                                                                              |
| Largest diff. peak and hole       | 0.186 and –0.188 e.Å <sup>–3</sup>                                                                               |

$$^aR = \sum(\|F_o| - |F_c|\|)/\sum |F_o|; ^bR_w = \{\sum[w(F_o^2 - F_c^2)^2]/\sum[w(F_o^2)^2]\}^{1/2}$$

## References:

1. CrysAlisPro, Agilent Technologies, Version 1.171.34.49, **2011**.
2. Sheldrick, G. M., *Acta Cryst.* **2008**, A64, 112.
3. Farrugia, L. J. WinGX Version 1.80.05, An integrated system of Windows Programs for the Solution, Refinement and Analysis of Single Crystal X-Ray Diffraction Data; Department of Chemistry, University of Glasgow, **1997–2009**.
4. (a) Foresman, J. B.; Frisch, A. E. *Exploring Chemistry with Electronic Structure Methods*; Gaussian, Inc.: Pittsburgh, PA. **1995**. (b) Hehre, W. J., Radom, L., Schleyer, P. V. R.; Pople, J. A. *Ab Initio Molecular Orbital Theory*; Wiley: New York, **1985**.

## General Experimental

**General Method.**  $^1\text{H}$  NMR (400 MHz) and  $^{13}\text{C}$  NMR (100 MHz) spectra were recorded in  $\text{CDCl}_3/\text{DMSO}-d_6$ . Chemical shifts for protons and carbons are reported in ppm from tetramethylsilane and are referenced to the carbon resonance of the solvent. Data are reported as follows: chemical shift, multiplicity (s = singlet, br s = broad singlet, d = doublet, t = triplet, q = quartet, m = multiplet, dd = doublet of doublet), coupling constants in Hertz and integration. High-resolution mass spectra were recorded on electrospray mass spectrometer. Crystal structure analysis was accomplished on single needles X-ray diffractometer. TLC analysis was performed on commercially prepared 60 F<sub>254</sub> silica gel plates and visualized by either UV irradiation or by staining with  $\text{I}_2$ . All purchased chemicals were used as received. All melting points are uncorrected.

## Optimization of reaction conditions

**Table S1. Screening of Base**

| Entry | Base/Acid                       | Solvent | T(min) | $T(^{\circ}\text{C})$ | Yield <sup>b</sup> (%) |
|-------|---------------------------------|---------|--------|-----------------------|------------------------|
| 1     | K <sup>t</sup> OBu              | DMSO    | 30     | 25                    | 30                     |
| 2     | KOH                             | DMSO    | 30     | 25                    | 65                     |
| 3     | NaOH                            | DMSO    | 30     | 25                    | 45                     |
| 4     | CsOH                            | DMSO    | 30     | 25                    | 50                     |
| 5     | K <sub>3</sub> PO <sub>4</sub>  | DMSO    | 30     | 25                    | 60                     |
| 6     | K <sub>2</sub> CO <sub>3</sub>  | DMSO    | 30     | 25                    | N.R                    |
| 7     | Cs <sub>2</sub> CO <sub>3</sub> | DMSO    | 30     | 25                    | N.R                    |
| 8     | Et <sub>3</sub> N               | DMSO    | 30     | 25                    | N.R                    |
| 9     | DABCO                           | DMSO    | 30     | 25                    | N.R                    |
| 10    | DBU                             | DMSO    | 30     | 25                    | 30                     |

[a] Reactions were performed using 0.5 mmol of 2-formylbenzophenone **1a**, benzylamine **2a** (0.6 mmol) and base (1.2 equiv) in 2.0 mL of DMSO. [b] Isolated yield.

**Table S2: Screening of Solvents**

| Entry | Base | Solvent | T(min) | $T(^{\circ}\text{C})$ | Yield <sup>b</sup> (%) |
|-------|------|---------|--------|-----------------------|------------------------|
| 1     | KOH  | DMSO    | 30     | rt                    | 80                     |
| 2     | KOH  | DMF     | 60     | rt                    | 50                     |
| 3     | KOH  | NMP     | 60     | rt                    | 40                     |
| 4     | KOH  | Dioxane | 60     | rt                    | N.R                    |
| 5     | KOH  | THF     | 60     | rt                    | N.R                    |

|    |     |                                      |    |    |     |
|----|-----|--------------------------------------|----|----|-----|
| 6  | KOH | n-BuOH                               | 60 | rt | N.R |
| 7  | KOH | t-AmOH                               | 60 | rt | N.R |
| 8  | KOH | EtOH                                 | 60 | rt | N.R |
| 9  | KOH | H <sub>2</sub> O                     | 60 | rt | N.R |
| 10 | KOH | ClCH <sub>2</sub> CH <sub>2</sub> Cl | 60 | rt | N.R |
| 11 | KOH | Toluene                              | 60 | rt | N.R |

[a] Reactions were performed using 0.5 mmol of 2-formylbenzophenone **1a**, benzylamine **2a** (0.6 mmol) and base (1.2 equiv) in 2.0 mL of DMSO. [b] Isolated yield.

**Table S3: Screening of temperature**



| Entry | Base | Solvent | T(min) | T(°C) | Yield <sup>b</sup> (%) |
|-------|------|---------|--------|-------|------------------------|
| 1     | KOH  | DMSO    | 60     | 25    | 90                     |
| 2     | KOH  | DMSO    | 60     | 50    | 90                     |
| 3     | KOH  | DMSO    | 60     | 80    | 85                     |
| 4     | KOH  | DMSO    | 60     | 90    | 75                     |
| 5     | KOH  | DMSO    | 60     | 100   | 65                     |
| 6     | KOH  | DMSO    | 60     | 120   | 60                     |

[a] Reactions were performed using 0.5 mmol of 2-formylbenzophenone **1a**, benzylamine **2a** (0.6 mmol) and base (1.2 equiv) in 2.0 mL of DMSO. [b] Isolated yield.

**Table S4. Screening of time**



| Entry | Base | Solvent | T(min) | T(°C) | Yield <sup>b</sup> (%) |
|-------|------|---------|--------|-------|------------------------|
| 1     | KOH  | DMSO    | 10     | rt    | 40                     |
| 2     | KOH  | DMSO    | 15     | rt    | 50                     |
| 3     | KOH  | DMSO    | 25     | rt    | 65                     |
| 4     | KOH  | DMSO    | 30     | rt    | 80                     |
| 5     | KOH  | DMSO    | 60     | rt    | 80                     |

[a] Reactions were performed using 0.5 mmol of 2-formylbenzophenone **1a**, benzylamine **2a** (0.6 mmol) and base (1.2 equiv) in 2.0 mL of DMSO. [b] Isolated yield.

## Synthesis of Starting Substrate:

### Synthesis of hydrazone derivatives (13a–s):

General procedure: According to a modified procedure<sup>1-2</sup> 2 acetyl or acylhydrazine **12** (10 mmol) was added to a solution of the salicylaldehyde derivative **11** (10 mmol) in both Acetic acid (50mL) and the mixture was stirred at room temperature. The reaction was monitor by TLC (1–3 h). The mixture was poured into cold water. The resulting solid was filtered, washed with water, triturated with hexane filtered and dried under vacuum. The hydrazides **13a–s** was essentially pure and was confirmed by NMR comparison to reported literature.



**(E)-N'-(2-hydroxy-5-methylbenzylidene)benzohydrazide (13b).** The

product was obtained as a off-white solid. Mp: 188–190 °C: Yield: 70 %. <sup>1</sup>H NMR (400 MHz, DMSO-d<sub>6</sub>) δ 12.09 (s, 1H), 11.04 (s, 1H), 8.55 (s, 1H), 6.89–7.79 (m, 8H), 2.19 (s, 3H); <sup>13</sup>C NMR (100 MHz, DMSO-d<sub>6</sub>) δ 163.5, 155.8, 148.9, 133.3, 132.7, 132.6, 129.9, 129.1, 128.5, 128.2, 118.8, 116.8, 20.4. HRMS (ESI) [M+H]<sup>+</sup> Calcd for C<sub>15</sub>H<sub>15</sub>N<sub>2</sub>O<sub>2</sub>: 255.1134, found 255.1130.



**(E)-N'-(5-(tert-butyl)-2-hydroxybenzylidene)benzohydrazide (13c).**

The product was obtained as a off-white solid. mp:187–189 °C: Yield: 71 %. <sup>1</sup>H NMR (400 MHz, DMSO-d<sub>6</sub>) δ 12.08 (s, 1H), 11.07 (s, 1H), 8.61 (s, 1H), 7.89 (d, *J* = 7.3 Hz, 2H), 7.58–7.46 (m, 4H), 7.29 (d, *J* = 8.2 Hz, 1H), 6.83 (d, *J* = 8.7 Hz, 1H), 1.22 (s, 9H); <sup>13</sup>C NMR (100 MHz, DMSO-d<sub>6</sub>) δ 163.5, 155.8, 149.3, 142.0, 133.4, 132.5, 129.2, 129.1, 128.2, 126.1, 118.4, 116.6, 34.3, 31.8. HRMS (ESI) [M+H]<sup>+</sup> Calcd for C<sub>18</sub>H<sub>21</sub>N<sub>2</sub>O<sub>2</sub>, 297.1603, found 297.1599



**(E)-N'-(2-hydroxy-4-isopropylbenzylidene)benzohydrazide**

**(13d).** The product was obtained as a off-white solid. mp:186–188 °C: Yield: 85 %. <sup>1</sup>H NMR (400 MHz, DMSO-d<sub>6</sub>) δ 12.07 (s, 1H), 11.03 (s, 1H), 8.60 (s, 1H), 7.90 (s, 1H), 7.56–7.14 (m, 5H), 6.84–6.82 (m, 1H), 2.80 (s, 1H), 1.14 (d, *J* = 5.0 Hz, 6H); <sup>13</sup>C NMR (100 MHz, DMSO-d<sub>6</sub>) δ 163.5, 156.1, 149.0, 139.7, 133.3, 132.5, 130.0, 129.1, 128.1, 127.3, 118.8, 116.8, 33.0, 24.5 HRMS (ESI) [M+H]<sup>+</sup> Calcd for C<sub>17</sub>H<sub>19</sub>N<sub>2</sub>O<sub>2</sub>: 283.1447, found 283.1435.



**(E)-N'-((4-hydroxy-[1,1'-biphenyl]-3-yl)methylene)benzo-**

**hydrazide (13f).** The product was obtained as a off-white solid. mp: 215–217 °C: Yield: 80 %. <sup>1</sup>H NMR (400 MHz, DMSO-d<sub>6</sub>) δ: 12.26 (s, 1H), 11.48 (s, 1H), 8.74 (s, 1H), 7.97 (d, *J* = 7.3 Hz, 2H), 7.89 (d, *J* = 2.3 Hz, 1H), 7.67–7.62 (m, 4H), 7.57 (t, *J* = 7.3 Hz, 2H), 7.46 (t, *J*

= 7.6 Hz, 2H), 7.34 (t,  $J$  = 7.3 Hz, 1H), 7.06 (d,  $J$  = 8.7 Hz, 1H);  $^{13}\text{C}$  NMR (100 MHz, DMSO- $d_6$ )  $\delta$  163.5, 157.6, 148.6, 140.0, 133.3, 132.6, 132.0, 130.2, 129.4, 129.1, 128.2, 127.9, 127.4, 126.7, 119.6, 117.6; HRMS (ESI)  $[\text{M}+\text{H}]^+$  Calcd for  $\text{C}_{20}\text{H}_{17}\text{N}_2\text{O}_2$ : 317.1290, found 317.1297.



**(*E*)-N'-(5-chloro-2-hydroxybenzylidene)benzohydrazide**

**(13g).** The product was obtained as a off-white solid. mp: 221–223 °C: Yield: 88 %.  $^1\text{H}$  NMR (400 MHz, DMSO- $d_6$ )  $\delta$  12.24 (s, 1H), 11.34 (s, 1H), 8.66 (s, 1H), 7.98 (d,  $J$  = 7.4 Hz, 2H), 7.70–7.54 (m, 4H), 7.33 (dd,  $J$  = 8.7, 2.4 Hz, 1H), 6.98 (d,  $J$  = 8.7 Hz, 1H);  $^{13}\text{C}$  NMR (100 MHz, DMSO- $d_6$ )  $\delta$  163.5, 156.6, 146.4, 133.3, 132.6, 131.3, 129.1, 128.2, 123.5, 121.2, 118.8; HRMS (ESI)  $[\text{M}+\text{H}]^+$  Calcd for  $\text{C}_{14}\text{H}_{12}\text{ClN}_2\text{O}_2$ : 275.0587, found 275.0590



**(*E*)-N'-(5-fluoro-2-hydroxybenzylidene)benzohydrazide (13j).**

The product was obtained as a off-white solid. mp: 198–200 °C: Yield: 90 %.  $^1\text{H}$  NMR (400 MHz, DMSO- $d_6$ )  $\delta$  12.14 (s, 1H), 11.00 (s, 1H), 8.61 (s, 1H), 7.91 (d,  $J$  = 7.3 Hz, 2H), 7.59–7.38 (m, 4H), 7.13–7.04 (m, 1H), 6.88–6.92 (m, 1H);  $^{13}\text{C}$  NMR (100 MHz, DMSO- $d_6$ )  $\delta$  163.5, 157.0, 154.7, 154.1, 146.8, 133.3, 132.6, 129.1, 128.2, 120.3, 120.3, 118.6, 118.4, 118.2, 118.1, 114.6, 114.3; HRMS (ESI)  $[\text{M}+\text{H}]^+$  Calcd for  $\text{C}_{14}\text{H}_{12}\text{N}_2\text{FO}_2$ : 259.0883, found 259.0881.



**(*E*)-N'-(2,4-Dichloro-6-hydroxybenzylidene)benzohydrazide (13k).**

The product was obtained as a off-white solid: mp: 190–192 °C: Yield: 91 %.  $^1\text{H}$  NMR (400 MHz, DMSO- $d_6$ )  $\delta$  12.48 (s, 2H), 8.52 (s, 1H), 7.91 (d,  $J$  = 7.3 Hz, 2H), 7.60–7.48 (m, 6H);  $^{13}\text{C}$  NMR (100 MHz, DMSO- $d_6$ )  $\delta$  163.5, 152.8, 147.5, 132.8, 132.7, 130.7, 129.1, 128.9, 128.3, 123.4, 122.0, 121.2; HRMS (ESI)  $[\text{M}+\text{H}]^+$  Calcd for  $\text{C}_{14}\text{H}_{11}\text{Cl}_2\text{N}_2\text{O}_2$ : 309.0198, found 309.0196.



**Ethyl (*E*)-3-((2-benzoylhydrazono)methyl)-4-hydroxybenzoate**

**(13l).** The product was obtained as a off-white solid. mp: 174–176 °C: Yield: 82 %.  $^1\text{H}$  NMR (400 MHz, DMSO- $d_6$ )  $\delta$  12.18 (s, 1H), 11.83 (s, 1H), 8.73 (s, 1H), 8.29 (s, 1H), 7.97–7.88

(m, 3H), 7.63–7.54 (m, 3H), 7.05 (d,  $J = 8.5$  Hz, 1H), 4.31 (q,  $J = 6.8$  Hz, 2H), 1.33 (t,  $J = 6.9$  Hz, 3H);  $^{13}\text{C}$  NMR (100 MHz, DMSO- $d_6$ )  $\delta$  165.7, 163.6, 161.6, 146.5, 133.4, 132.8, 132.6, 130.4, 129.1, 128.2, 121.6, 119.9, 117.2, 61.0, 14.8; HRMS (ESI)  $[\text{M}+\text{H}]^+$  Calcd for  $\text{C}_{17}\text{H}_{17}\text{N}_2\text{O}_4$ : 313.1188, found 313.1188.



**(E)-4-Fluoro-N'-(2-hydroxybenzylidene)benzohydrazide (13m).**

The product was obtained as a off-white solid. mp: 200–202 °C : Yield: 78 %.  $^1\text{H}$  NMR (400 MHz, DMSO- $d_6$ )  $\delta$  12.09 (s, 1H), 11.22 (s, 1H), 8.60 (s, 1H), 7.98 (dd,  $J = 8.7, 5.5$  Hz, 2H), 7.52 (d,  $J = 7.6$  Hz, 1H), 7.35 (t,  $J = 8.8$  Hz, 2H), 7.29–7.25 (m, 1H), 6.91–6.87 (m, 2H);  $^{13}\text{C}$  NMR (100 MHz, DMSO- $d_6$ )  $\delta$  166.1, 162.9 (d,  $J_{\text{C-F}} = 247$  Hz), 158.0, 148.8, 132.0, 131.0, 130.5, (d,  $J_{\text{C-F}} = 7.7$  Hz), 129.8, 119.9, 119.2, 117.0, 116.1, (d,  $J_{\text{C-F}} = 22.0$  Hz); HRMS (ESI)  $[\text{M}+\text{H}]^+$  Calcd for  $\text{C}_{14}\text{H}_{12}\text{N}_2\text{FO}_2$ : 259.0883, found 259.0881



**(E)-N'-(2-Hydroxybenzylidene)isonicotinohydrazide (13o).** The

product was obtained as a off-white solid. mp: 250–252 °C : Yield: 85 %.  $^1\text{H}$  NMR (400 MHz, DMSO- $d_6$ )  $\delta$  12.27 (s, 1H), 11.08 (s, 1H), 8.75–8.64 (m, 3H), 7.81 (d,  $J = 5.6$  Hz, 2H), 7.55 (d,  $J = 6.7$  Hz, 1H), 7.26 (t,  $J = 8.2$  Hz, 1H), 6.92–6.85 (m, 2H);  $^{13}\text{C}$  NMR (100 MHz, DMSO- $d_6$ )  $\delta$  161.9, 158.0, 150.9, 149.6, 140.5, 132.2, 129.8, 122.0, 119.9, 119.2, 117.0; HRMS (ESI)  $[\text{M}+\text{H}]^+$  Calcd for  $\text{C}_{13}\text{H}_{12}\text{N}_3\text{O}_2$ : 242.0930, found 242.0932



**(E)-4-(tert-Butyl)-N'-(2-hydroxybenzylidene)benzohydrazide**

**(13p).** The product was obtained as a off-white solid. mp: 188–190 °C: Yield: 70 %.  $^1\text{H}$  NMR (400 MHz, DMSO- $d_6$ )  $\delta$  12.03 (s, 1H), 11.31 (s, 1H), 8.60 (s, 1H), 7.85 (d,  $J = 8.4$  Hz, 2H), 7.53–7.49 (m, 3H), 7.28–7.24 (m, 1H), 6.91–6.86 (m, 2H), 1.27 (s, 9H);  $^{13}\text{C}$  NMR (100 MHz, DMSO- $d_6$ )  $\delta$  163.2, 158.0, 155.5, 148.6, 131.9, 130.5, 130.1, 128.1, 125.9, 119.9, 119.2, 117.0, 35.3, 31.4; HRMS (ESI)  $[\text{M}+\text{H}]^+$  Calcd for  $\text{C}_{18}\text{H}_{21}\text{N}_2\text{O}_2$ : 297.1603, found 297.1599



**(E)-N'-((2-hydroxynaphthalen-1-yl)methylene)benzohydrazide**

**(13q).** The product was obtained as a off-white solid. mp: 220–222 °C: Yield: 86 %. <sup>1</sup>H NMR (400 MHz, DMSO-d<sub>6</sub>) δ 12.85 (s, 1H), 12.27 (s, 1H), 9.52 (s, 1H), 8.26 (d, *J* = 8.5 Hz, 1H), 8.02 (d, *J* = 7.1 Hz, 2H), 7.97–7.91 (m, 2H), 7.68–7.59 (m, 5H), 7.43 (t, *J* = 7.4 Hz, 1H), 7.27 (d, *J* = 8.9 Hz, 1H); <sup>13</sup>C NMR (100 MHz, DMSO-d<sub>6</sub>) δ 163.1, 158.6, 147.4, 133.3, 133.1, 132.7, 132.1, 129.5, 129.2, 128.3, 128.1, 124.1, 121.1, 119.4, 109.0; HRMS (ESI) [M+H]<sup>+</sup> Calcd for C<sub>18</sub>H<sub>15</sub>N<sub>2</sub>O<sub>2</sub>: 291.1134, found 291.1134



**(E)-4-chloro-N'-((2-hydroxynaphthalen-1-yl)methylene)**

**benzohydrazide (13r).** The product was obtained as a off-white solid. mp: 274–276 °C : Yield: 81 %. <sup>1</sup>H NMR (400 MHz, DMSO-d<sub>6</sub>) δ 12.71 (s, 1H), 12.29 (s, 1H), 9.46 (s, 1H), 8.24 (d, *J* = 13.7 Hz, 1H), 7.99 (d, *J* = 8.4 Hz, 2H), 7.90 (q, *J* = 9.4 Hz, 2H), 7.62 (q, *J* = 9.7 Hz, 3H), 7.38–7.41 (m, 1H), 7.22 (d, *J* = 11.4 Hz, 1H); <sup>13</sup>C NMR (100 MHz, DMSO-d<sub>6</sub>) δ 161.6, 158.2, 147.2, 137.1, 133.0, 131.7, 131.4, 129.6, 129.1, 128.9, 128.0, 123.7, 120.8, 119.0, 108.6; HRMS (ESI) [M+H]<sup>+</sup> Calcd for C<sub>18</sub>H<sub>13</sub>ClN<sub>2</sub>O<sub>2</sub>, 325.744, found 325.0727



**(E)-N'-((2-hydroxynaphthalen-1-yl)methylene)thiophene-2-**

**carbohydrazide (13s).** The product was obtained as a off-white solid. mp: 210–212 °C : Yield: 88 %. <sup>1</sup>H NMR (400 MHz, DMSO-d<sub>6</sub>) δ 12.55 (s, 2H), 9.39 (s, 1H), 8.24 (d, *J* = 8.5 Hz, 1H), 7.91–7.83 (m, 4H), 7.56 (t, *J* = 7.5 Hz, 1H), 7.36 (t, *J* = 7.4 Hz, 1H), 7.24–7.18 (m, 2H); <sup>13</sup>C NMR (100 MHz, DMSO-d<sub>6</sub>) δ 157.9, 157.1, 146.0, 136.8, 131.8, 131.3, 130.4, 128.2, 127.1, 127.0, 126.6, 122.6, 119.1, 118.5, 107.6; HRMS (ESI) [M+H]<sup>+</sup> Calcd for C<sub>16</sub>H<sub>13</sub>N<sub>2</sub>O<sub>2</sub>S: 297.0698, found 297.0692.

**Synthesis of 2-formylarylketone substrates (1a–s).** The 2-formylarylketone substrates were prepared by using literature.<sup>2–6</sup> The Pb(OAc)<sub>4</sub> (2.44g, 5.5 mmol) was added in portions to a stirring solution of hydrazide **13** (5.0 mmol) in THF (25 mL). The mixture turned orange immediately with a mild evolution of N<sub>2</sub> gas. The mixture was stirred at rt for 2–3 h or monitored by TLC. The solid was filtered off by passing the mixture through a pad of

celite and washed with EtOAc. The organic solvents were removed in vacuo, the crude washed with saturated aqueous NaHCO<sub>3</sub> and brine. The mixture was extracted with EtOAc (3 x 30 mL). The combined organic layers were dried over Na<sub>2</sub>SO<sub>4</sub>, filtered and evaporated. Pure product was obtained by column chromatography. The compounds **1a**, **1e**, **1o**, **1p** and **1t** were reported in the literature.<sup>2,6</sup>



**2-Benzoyl-5-methylbenzaldehyde (1b).** The product was obtained as a colourless solid. m.p: 64–66 °C: Yield: 85%), <sup>1</sup>H NMR (400 MHz, CDCl<sub>3</sub>)  $\delta$  9.89 (s, 1H), 7.66 (d,  $J$  = 10.2 Hz, 3H), 7.46–7.42 (m, 1H), 7.33–7.25 (m, 4H), 2.34 (s, 3H); <sup>13</sup>C NMR (100 MHz, CDCl<sub>3</sub>)  $\delta$  196.7, 191.3, 141.7, 138.8, 137.6, 136.1, 134.1, 133.8, 130.6, 130.3, 129.7, 128.9, 21.6; HRMS (ESI) [M+H]<sup>+</sup> Calcd for C<sub>15</sub>H<sub>13</sub>O<sub>2</sub>: 225.0916, found 225.0925.



**2-Benzoyl-5-(tert-butyl)benzaldehyde (1c).** The product was obtained as a colourless solid. m.p: 74–76 °C: Yield: 80%, <sup>1</sup>H NMR (400 MHz, CDCl<sub>3</sub>)  $\delta$  10.04 (s, 1H), 8.05 (d,  $J$  = 1.8 Hz, 1H), 7.81 (d,  $J$  = 7.8 Hz, 2H), 7.69 (dd,  $J$  = 8.0, 2.1 Hz, 1H), 7.61–7.57 (m, 1H), 7.46 (dd,  $J$  = 7.6, 5.3 Hz, 3H), 1.39 (s, 9H); <sup>13</sup>C NMR (100 MHz, CDCl<sub>3</sub>)  $\delta$  196.6, 191.2, 154.6, 138.8, 137.4, 135.7, 133.6, 130.4, 130.2, 129.3, 128.7, 126.8, 35.3, 31.2; HRMS (ESI) [M+H]<sup>+</sup> Calcd for C<sub>18</sub>H<sub>19</sub>O<sub>2</sub>: 267.1385, found 267.1424.



**2-Benzoyl-4-isopropylbenzaldehyde (1d).** The product was obtained as a colourless solid. m.p: 60–62 °C: Yield: 75%, <sup>1</sup>H NMR (400 MHz, CDCl<sub>3</sub>)  $\delta$  9.99 (s, 1H), 7.85 (s, 1H), 7.77–7.74 (m, 2H), 7.55–7.48 (m, 2H), 7.42–7.38 (m, 4H), 3.04–2.97 (m, 1H),

1.27–1.25 (m, 6H);  $^{13}\text{C}$  NMR (100 MHz,  $\text{CDCl}_3$ )  $\delta$  196.6, 191.2, 152.2, 139.0, 137.3, 136.0, 133.6, 131.5, 130.1, 129.6, 128.8, 128.7, 128.5, 127.9, 34.1, 23.7; HRMS (ESI)  $[\text{M}+\text{H}]^+$  Calcd for  $\text{C}_{17}\text{H}_{17}\text{O}_2$ : 253.1229, found 253.1226.



**4-Benzoyl-[1,1'-biphenyl]-3-carbaldehyde (1f).** The product was obtained as a colourless solid. m.p: 94–96 °C: Yield: 82%,  $^1\text{H}$  NMR (400 MHz,  $\text{CDCl}_3$ )  $\delta$  10.12 (s, 1H), 8.27 (d,  $J = 1.8$  Hz, 1H), 7.92–7.86 (m, 3H), 7.70–7.61 (m, 4H), 7.54–7.43 (m, 5H);  $^{13}\text{C}$  NMR (100 MHz,  $\text{CDCl}_3$ )  $\delta$  196.3, 190.8, 143.9, 139.9, 138.9, 137.3, 136.3, 133.8, 131.6, 130.2, 130.0, 129.3, 128.8, 128.7, 128.3, 127.3; HRMS (ESI)  $[\text{M}+\text{H}]^+$  Calcd for  $\text{C}_{20}\text{H}_{15}\text{O}_2$ : 287.1072, found 287.1073.



**2-Benzoyl-5-chlorobenzaldehyde (1g).** The product was obtained as a colourless solid. m.p: 70–72 °C: Yield: 70%,  $^1\text{H}$  NMR (400 MHz,  $\text{CDCl}_3$ )  $\delta$  9.92 (s, 1H), 7.93 (d,  $J = 2.2$  Hz, 1H), 7.72 (d,  $J = 7.1$  Hz, 2H), 7.58–7.54 (m, 2H), 7.43–7.39 (m, 3H);  $^{13}\text{C}$  NMR (100 MHz,  $\text{CDCl}_3$ )  $\delta$  195.3, 189.3, 139.5, 137.6, 137.2, 136.9, 134.1, 133.2, 130.8, 130.1, 129.6, 128.9; HRMS (ESI)  $[\text{M}+\text{H}]^+$  Calcd for  $\text{C}_{14}\text{H}_9\text{ClO}_2$ : 245.0369, found 245.0363.



**2-Benzoyl-5-fluorobenzaldehyde (1i).** The product was obtained as a colourless solid. m.p: 73–75 °C: Yield: 68%,  $^1\text{H}$  NMR (400 MHz,  $\text{CDCl}_3$ )  $\delta$  9.95 (s, 1H), 7.73 (d,  $J = 7.8$  Hz, 2H), 7.65 (dd,  $J = 8.7, 2.3$  Hz, 1H), 7.56 (t,  $J = 7.6$  Hz, 1H), 7.50 (dd,  $J = 8.2, 5.0$  Hz, 1H), 7.42 (t,  $J = 7.8$  Hz, 2H), 7.29 (td,  $J = 8.1, 2.4$  Hz, 1H);  $^{13}\text{C}$  NMR (100 MHz,  $\text{CDCl}_3$ )  $\delta$  194.1, 188.2, 162.8 (d,  $J_{\text{C-F}} = 253$  Hz), 137.4, 137.4, 136.4, 136.0, 132.9, 130.9 (d,  $J_{\text{C-F}} = 7.7$  Hz), 129.1, 127.8, 119.1, 118.9, 114.9 (d,  $J_{\text{C-F}} = 23$  Hz); HRMS (ESI)  $[\text{M}+\text{H}]^+$  Calcd for  $\text{C}_{14}\text{H}_9\text{FO}_2$ : 229.0665, found 229.0665.



**2-Benzoyl-3,5-dichlorobenzaldehyde (1k).** The product was obtained as a colourless solid. m.p: 98–100 °C: Yield: 62%,  $^1\text{H}$  NMR (400 MHz DMSO- $d_6$ )  $\delta$  9.77 (s, 1H), 8.17 (s, 1H), 8.05–7.85 (m, 1H), 7.58 (dd,  $J$  = 20.3, 7.1 Hz, 3H), 7.47–7.39 (m, 2H);  $^{13}\text{C}$  NMR (100 MHz DMSO- $d_6$ )  $\delta$  193.6, 191.0, 137.2, 136.9, 136.0, 135.8, 135.2, 134.8, 134.5, 133.3, 132.4, 129.5, 129.0; HRMS (ESI)  $[\text{M}+\text{H}]^+$  Calcd for  $\text{C}_{14}\text{H}_9\text{Cl}_2\text{O}_2$ : 278.9980, found 278.9929.



**Ethyl 4-benzoyl-3-formylbenzoate (1l).** The product was obtained as a colourless solid. m.p: 72–74 °C: Yield: 60%,  $^1\text{H}$  NMR (400 MHz,  $\text{CDCl}_3$ )  $\delta$  9.92 (s, 1H), 8.55 (s, 1H), 8.25 (d,  $J$  = 9.1 Hz, 1H), 7.66 (d,  $J$  = 8.2 Hz, 2H), 7.49 (dd,  $J$  = 15.8, 7.1 Hz, 2H), 7.35 (t,  $J$  = 7.8 Hz, 2H), 4.35 (q,  $J$  = 7.2 Hz, 2H), 1.34 (t,  $J$  = 7.1 Hz, 3H);  $^{13}\text{C}$  NMR (100 MHz,  $\text{CDCl}_3$ )  $\delta$  195.9, 189.9, 164.8, 144.8, 136.5, 135.3, 134.2, 134.0, 132.6, 131.6, 129.8, 128.9, 128.8, 61.9, 14.3; HRMS (ESI)  $[\text{M}+\text{H}]^+$  Calcd for  $\text{C}_{17}\text{H}_{15}\text{O}_4$ : 283.0970, found 283.0979.



**2-(4-Fluorobenzoyl)benzaldehyde (1m).** The product was obtained as a colourless solid. m.p: 113–115 °C: Yield: 69%,  $^1\text{H}$  NMR (400 MHz,  $\text{CDCl}_3$ )  $\delta$  9.94 (s, 1H), 7.96–7.94 (m, 1H), 7.76 (td,  $J$  = 5.9, 2.3 Hz, 2H), 7.65–7.60 (m, 2H), 7.42 (q,  $J$  = 2.5 Hz, 1H), 7.08–7.04 (m, 2H);  $^{13}\text{C}$  NMR (100 MHz,  $\text{CDCl}_3$ )  $\delta$  194.9, 190.5, 165.8 (d,  $J_{\text{C-F}}$  = 255 Hz), 140.6, 134.9, 133.4, 133.3, 133.2, 132.4, 132.3, 130.5 (d,  $J_{\text{C-F}}$  = 5.8 Hz), 128.4, 115.6 (d,  $J_{\text{C-F}}$  = 22.0 Hz); HRMS (ESI)  $[\text{M}+\text{H}]^+$  Calcd for  $\text{C}_{14}\text{H}_{10}\text{FO}_2$ : 229.0665, found 229.0665.



**2-Isonicotinoylbenzaldehyde (1o).** The product was obtained as a colourless solid. m.p: 114–116 °C: Yield: 55%,  $^1\text{H}$  NMR (400 MHz,  $\text{CDCl}_3$ )  $\delta$  9.87–9.55 (m, 1H), 8.73–8.41 (m, 2H), 7.93–6.90 (m, 6H);  $^{13}\text{C}$  NMR (100 MHz,  $\text{CDCl}_3$ )  $\delta$  195.9, 190.9, 150.7,

150.5, 142.8, 138.9, 135.3, 133.9, 131.8, 131.2, 128.7, 123.1, 122.1; HRMS (ESI)  $[M+H]^+$  Calcd for  $C_{13}H_{10}NO_2$ : 212.0712, found 212.0708.



**2-(4-(*tert*-Butyl)benzoyl)benzaldehyde (1p).** The product was obtained as a colourless solid. m.p: 92–94 °C: Yield: 73%,  $^1H$  NMR (400 MHz,  $CDCl_3$ )  $\delta$  9.99 (s, 1H), 8.00–7.98 (m, 1H), 7.72 (d,  $J$  = 8.4 Hz, 2H), 7.63 (t,  $J$  = 3.1 Hz, 2H), 7.45 (d,  $J$  = 8.4 Hz, 3H), 1.30 (s, 9H);  $^{13}C$  NMR (100 MHz,  $CDCl_3$ )  $\delta$  195.9, 190.5, 157.4, 141.6, 135.1, 134.3, 133.1, 130.3, 129.9, 129.6, 128.6, 125.5, 35.0, 30.9; HRMS (ESI)  $[M+H]^+$  Calcd for  $C_{18}H_{19}O_2$ : 267.1385, found 267.1424.



**2-Benzoyl-1-naphthaldehyde (1q).** The product was obtained as a colourless solid. m.p: 145–147 °C: Yield: 88%,  $^1H$  NMR (400 MHz,  $CDCl_3$ )  $\delta$  10.55 (s, 1H), 8.97 (d,  $J$  = 8.5 Hz, 1H), 8.12 (d,  $J$  = 8.4 Hz, 1H), 7.95 (d,  $J$  = 8.2 Hz, 1H), 7.82–7.79 (m, 2H), 7.73–7.69 (m, 1H), 7.66–7.56 (m, 2H), 7.50–7.43 (m, 3H);  $^{13}C$  NMR (100 MHz,  $CDCl_3$ )  $\delta$  197.5, 191.2, 143.3, 137.2, 134.2, 133.9, 130.8, 130.7, 130.1, 129.6, 128.8, 127.9, 125.1, 124.5; HRMS (ESI)  $[M+H]^+$  Calcd for  $C_{18}H_{13}O_2$ : 261.0916, found 261.0912.



**2-(4-Chlorobenzoyl)-1-naphthaldehyde (1r).** The product was obtained as a colourless solid. m.p: 150–152 °C: Yield: 83%,  $^1H$  NMR (400 MHz,  $CDCl_3$ )  $\delta$  10.62 (s, 1H), 8.94 (d,  $J$  = 8.4 Hz, 1H), 8.17 (d,  $J$  = 8.4 Hz, 1H), 8.00 (d,  $J$  = 8.4 Hz, 1H), 7.78–7.74 (m, 3H), 7.70 (d,  $J$  = 8.4 Hz, 1H), 7.49 (d,  $J$  = 7.6 Hz, 1H), 7.44 (dd,  $J$  = 8.8, 1.9 Hz, 2H);  $^{13}C$  NMR (100 MHz,  $CDCl_3$ )  $\delta$  196.3, 190.7, 142.3, 140.3, 135.4, 134.3, 134.1, 131.2, 130.9, 130.4, 129.6, 129.1, 128.8, 127.9, 124.6, 124.2; HRMS (ESI)  $[M+H]^+$  Calcd for  $C_{18}H_{12}ClO_2$ : 295.0526, found 295.0523.



**2-(Thiophene-2-carbonyl)-1-naphthaldehyde (1s).** The product was obtained as a colourless solid. m.p: 138–140 °C: Yield: 86%,  $^1\text{H}$  NMR (400 MHz,  $\text{CDCl}_3$ )  $\delta$  10.42 (s, 1H), 8.89 (d,  $J$  = 8.4 Hz, 1H), 7.97 (d,  $J$  = 8.4 Hz, 1H), 7.79 (d,  $J$  = 8.4 Hz, 1H), 7.63 (d,  $J$  = 6.1 Hz, 1H), 7.58–7.54 (m, 1H), 7.50–7.45 (m, 2H), 7.22 (q,  $J$  = 1.8 Hz, 1H), 6.95 (t,  $J$  = 4.2 Hz, 1H);  $^{13}\text{C}$  NMR (100 MHz,  $\text{CDCl}_3$ )  $\delta$  191.1, 188.9, 144.2, 142.8, 136.0, 135.8, 134.0, 133.9, 130.1, 129.4, 128.5, 128.4, 128.3, 127.7, 125.2, 124.1; HRMS (ESI)  $[\text{M}+\text{H}]^+$  Calcd for  $\text{C}_{16}\text{H}_{11}\text{O}_2\text{S}$ : 267.0480, found 267.0473.

## References:

1. Hansen, T. V.; Skattebøl, L. *Org. Synth.* 2005, **82**, 64.
2. D. H. T. Phan, B. Kim, V. M. Dong, *J. Am. Chem. Soc.* 2009, **131**, 15608.
3. R. J. Holmberg, A. –J. Hutchings, F. Habib, I. Korobkov, J. C. Scaiano and M. Murugesu, *Inorg. Chem.*, 2013, **52**, 14411
4. D. H. Dethe and G. M. Murhade, *Chem. Commun.*, 2015, **51**, 10891
5. Dimos, V.; Papapetrou, M.; Kotali, A. *Org. Prep. Proced. Int.*, 1998, **30**, 177.
6. J. Jacq, C. Einhorn and J. Einhorn, *Org. Lett.* 2008, **17**, 3757.

### General Procedure for the Synthesis of Functionalized Isoquinolines 3a–o and 4a–r

In an oven-dried round bottom flask, a solution of substrate **1** (0.5 mmol), arylalkylamine **2** (0.6 mmol) and 1.2 equiv. of crushed KOH in 2.0 mL of DMSO were added. The resulting reaction mixture was stirred at room temperature for 60 min. The reaction was monitored by TLC analysis; after completion of starting material, the reaction was poured in water and extracted by ethyl acetate (20 mL). The organic layer was washed with aqueous saturated brine solution and dried over Na<sub>2</sub>SO<sub>4</sub>. Organic layer was concentrated under reduced pressure. The crude material was purified by column chromatography on silica gel (100–200) (hexane:ethyl acetate; 95/5). The structure and purity of known starting materials were confirmed by comparison of their physical and spectral data (<sup>1</sup>H NMR, <sup>13</sup>C NMR, and HRMS).



**3,4-Diphenylisoquinoline (3a).** The product was obtained as a white solid, mp: 168–170 °C (112.4 mg, 80%), <sup>1</sup>H NMR (400 MHz, CDCl<sub>3</sub>) δ 9.19 (s, 1H), 7.82–7.80 (m, 1H), 7.50–7.49 (m, 1H), 7.40–7.34 (m, 2H), 7.24–7.22 (m, 2H), 7.19–7.11 (m, 3H), 7.07–6.98 (m, 5H); <sup>13</sup>C NMR (100 MHz, CDCl<sub>3</sub>) δ 151.5, 150.3, 140.5, 136.9, 135.6, 131.0, 130.3, 130.2, 130.1, 128.1, 127.4, 127.3, 127.1, 127.0, 126.9, 126.6, 125.3; HRMS (ESI) [M+H]<sup>+</sup> Calcd for C<sub>21</sub>H<sub>16</sub>N: 282.1283, found 282.1280.



**7-Methyl-3,4-diphenylisoquinoline (3b).** The product was obtained as a white solid, mp: 169–171 °C (121.0 mg, 82%), <sup>1</sup>H NMR (400 MHz, CDCl<sub>3</sub>) δ 9.32 (s, 1H), 7.94 (d, *J* = 11.0 Hz, 1H), 7.44–7.36 (m, 6H), 7.26–7.19 (m, 5H), 2.45 (s, 3H); <sup>13</sup>C NMR (100 MHz, CDCl<sub>3</sub>) δ 151.3, 150.6, 141.2, 140.8, 137.4, 136.3, 131.4, 130.4, 129.3, 128.4, 127.7, 127.6, 127.4, 127.2, 125.9, 124.5, 22.5; HRMS (ESI) [M+H]<sup>+</sup> Calcd for C<sub>22</sub>H<sub>18</sub>N: 296.1439, found 296.1417.



**7-(*tert*-Butyl)-3,4-diphenylisoquinoline (3c).** The product was obtained as a white solid, mp:170–172 °C (143.2 mg, 85%),  $^1\text{H}$  NMR (400 MHz,  $\text{CDCl}_3$ )  $\delta$  9.34 (s, 1H), 7.96 (d,  $J$  = 2.3 Hz, 1H), 7.70 (dd,  $J$  = 8.9 and 2.1 Hz, 1H), 7.62 (d,  $J$  = 8.7 Hz, 1H), 7.38–7.31 (m, 5H), 7.25–7.16 (m, 5H), 1.43 (s, 9H);  $^{13}\text{C}$  NMR (100 MHz,  $\text{CDCl}_3$ )  $\delta$  151.8, 150.2, 150.0, 141.0, 137.5, 134.3, 131.3, 130.41, 130.37, 129.6, 128.4, 127.7, 127.6, 127.4, 127.1, 125.5, 122.4, 35.1, 31.2; HRMS (ESI)  $[\text{M}+\text{H}]^+$  Calcd for  $\text{C}_{25}\text{H}_{24}\text{N}$ : 338.1909, found 338.1899.



**6-Isopropyl-3,4-diphenylisoquinoline (3d).** The product was obtained as a white solid, mp:158–160 °C (140.5 mg, 87%),  $^1\text{H}$  NMR (400 MHz,  $\text{CDCl}_3$ )  $\delta$  9.33 (s, 1H), 7.85 (s, 1H), 7.61 (d,  $J$  = 8.7 Hz, 1H), 7.54–7.51 (m, 1H), 7.37–7.33 (m, 5H), 7.25–7.17 (m, 5H), 3.15–3.08 (m, 1H), 1.36 (d,  $J$  = 6.9 Hz, 6H);  $^{13}\text{C}$  NMR (100 MHz,  $\text{CDCl}_3$ )  $\delta$ : 151.5, 150.0, 147.8, 140.9, 137.5, 134.7, 131.3, 130.7, 130.6, 130.3, 128.4, 127.8, 127.7, 127.4, 127.0, 125.7, 123.6, 34.2, 23.9; HRMS (ESI)  $[\text{M}+\text{H}]^+$  Calcd for  $\text{C}_{24}\text{H}_{22}\text{N}$ : 324.1752, found 324.1730.



**5-Methoxy-3,4-diphenylisoquinoline (3e).** The product was obtained as a white solid. mp:100–102 °C (133.7 mg, 86%),  $^1\text{H}$  NMR (400 MHz,  $\text{CDCl}_3$ )  $\delta$  9.27 (s, 1H), 7.60 (d,  $J$  = 8.1 Hz, 1H), 7.50 (t,  $J$  = 7.8 Hz, 1H), 7.24 (d,  $J$  = 6.6 Hz, 2H), 7.17–7.11 (m, 8H), 6.93 (d,  $J$  = 7.6 Hz, 1H), 3.40 (s, 3H);  $^{13}\text{C}$  NMR (100 MHz,  $\text{CDCl}_3$ )  $\delta$ : 156.4, 152.3, 151.4, 141.4, 140.8, 130.4, 130.2, 129.4, 129.3, 127.6, 127.3, 126.62, 126.56, 126.0, 120.2, 110.4, 55.7.; HRMS (ESI)  $[\text{M}+\text{H}]^+$  Calcd for  $\text{C}_{22}\text{H}_{18}\text{NO}$ : 312.1388, found 312.1383.



**3,4,7-Triphenylisoquinoline (3f):** The product was obtained as a white solid. mp: 184–186 °C (157.0 mg, 88%),  $^1\text{H}$  NMR (400 MHz,  $\text{CDCl}_3$ )  $\delta$  9.41 (s, 1H), 8.20 (s, 1H), 7.85 (dd,  $J = 9.2, 1.8$  Hz, 1H), 7.74–7.69 (m, 3H), 7.50–7.46 (m, 2H), 7.40–7.34 (m, 6H), 7.27–7.16 (m, 5H);  $^{13}\text{C}$  NMR (100 MHz,  $\text{CDCl}_3$ ):  $\delta$  152.1, 150.7, 140.8, 140.1, 139.7, 137.3, 135.2, 131.3, 130.6, 130.4, 130.2, 129.2, 128.5, 128.1, 127.9, 127.8, 127.5, 127.4, 127.3, 126.4, 125.3; HRMS (ESI)  $[\text{M}+\text{H}]^+$  Calcd for  $\text{C}_{27}\text{H}_{20}\text{N}$ : 358.1596, found 358.1596.



**7-Chloro-3,4-diphenylisoquinoline (3g):** The product was obtained as orange solid (116.5 mg, 74%) mp: 188–190 °C;  $^1\text{H}$  NMR (400 MHz,  $\text{CDCl}_3$ )  $\delta$  9.27 (s, 1H), 8.00–7.99 (m, 1H), 7.61 (d,  $J = 9.1$  Hz, 1H), 7.50 (dd,  $J = 10.6$  and  $9.1$  Hz, 1H), 7.36–7.33 (m, 5H), 7.23–7.18 (m, 5H);  $^{13}\text{C}$  NMR (100 MHz,  $\text{CDCl}_3$ ):  $\delta$  150.9, 150.6, 140.2, 136.6, 134.2, 135.6, 131.3, 131.0, 130.1, 128.4, 127.6, 127.52, 127.50, 127.2, 126.1. HRMS (ESI)  $[\text{M}+\text{H}]^+$  Calcd for  $\text{C}_{21}\text{H}_{15}\text{NCl}$ : 316.0894, found 316.0894.



**7-Bromo-3,4-diphenylisoquinoline (3h):** The product was obtained as a light yellow solid (134.6 mg, 75%), mp: 189–191 °C;  $^1\text{H}$  NMR (400 MHz,  $\text{CDCl}_3$ )  $\delta$  9.28 (s, 1H), 8.17 (d,  $J = 1.4$  Hz, 1H), 7.65–7.62 (m, 1H), 7.54 (d,  $J = 9.2$  Hz, 1H), 7.38–7.34 (m, 5H), 7.22–7.18 (m, 5H);  $^{13}\text{C}$  NMR (100 MHz,  $\text{CDCl}_3$ )  $\delta$  150.0, 149.5, 139.2, 135.5, 133.4, 132.8, 130.0, 129.6, 129.1, 128.4, 127.4, 126.6, 126.2, 119.7.; HRMS (ESI)  $[\text{M}+\text{H}]^+$  Calcd for  $\text{C}_{21}\text{H}_{15}\text{BrN}$ : 360.0388, found 360.0382.



**7-Fluoro-3,4-diphenylisoquinoline (3i):** The product was obtained as colourless solid (108 mg, 72%), mp: 172–174 °C;  $^1\text{H}$  NMR (400 MHz,  $\text{CDCl}_3$ )  $\delta$  9.30 (s,

1H), 7.67 (q,  $J = 4.7$  Hz, 1H), 7.61 (dd,  $J = 8.5, 2.5$  Hz, 1H), 7.37–7.32 (m, 6H), 7.24–7.16 (m, 5H).;  $^{13}\text{C}$  NMR (100 MHz,  $\text{CDCl}_3$ )  $\delta$  160.8 (d,  $J_{\text{C-F}} = 249$  Hz), 151.0, 150.9, 150.4, 140.5, 137.0, 133.1, 131.2, 130.8, 130.3, 128.8 (d,  $J_{\text{C-F}} = 8.7$  Hz), 128.5, 128.3, 128.2, 127.8, 127.7, 127.3, 121.1, 120.9, 110.5 (d,  $J_{\text{C-F}} = 20.0$  Hz).; HRMS (ESI)  $[\text{M}+\text{H}]^+$  Calcd for  $\text{C}_{21}\text{H}_{15}\text{NF}$ : 300.1189, found 300.1179



**7-Iodo-3,4-diphenylisoquinoline (3j):** The product was obtained as a orange solid (142.8 mg, 70% ), mp: 160–162 °C;  $^1\text{H}$  NMR (400 MHz,  $\text{CDCl}_3$ )  $\delta$  9.17 (s, 1H), 8.33 (d,  $J = 1.4$  Hz, 1H), 7.73 (dd,  $J = 9.2, 1.4$  Hz, 1H), 7.33–7.26 (m, 5H), 7.14–7.11 (m, 5H);  $^{13}\text{C}$  NMR (100 MHz,  $\text{CDCl}_3$ )  $\delta$  150.1, 149.3, 139.3, 138.0, 135.5, 135.2, 133.8, 133.3, 130.1, 129.6, 129.2, 128.4, 127.7, 127.4, 126.6, 126.4, 126.3, 91.2.; HRMS (ESI)  $[\text{M}+\text{H}]^+$  Calcd for  $\text{C}_{21}\text{H}_{15}\text{NI}$ : 408.0249, found 408.0256.



**5,7-Dichloro-3,4-diphenylisoquinoline (3k):** The product was obtained as a brown solid (118.6 mg, 68%), mp: 134–136 °C;  $^1\text{H}$  NMR (400 MHz,  $\text{CDCl}_3$ )  $\delta$  9.25 (s, 1H), 7.95 (s, 1H), 7.67 (s, 1H), 7.23–7.13 (m, 10H);  $^{13}\text{C}$  NMR (100 MHz,  $\text{CDCl}_3$ )  $\delta$  153.5, 150.5, 139.7, 136.8, 133.4, 131.7, 131.1, 130.7, 129.9, 129.1, 128.8, 128.5, 126.6, 126.5, 126.3, 125.5; HRMS (ESI)  $[\text{M}+\text{H}]^+$  Calcd for  $\text{C}_{21}\text{H}_{14}\text{NCl}_2$ : 350.0503, found 350.0502.



**Ethyl 3,4-diphenylisoquinoline-7-carboxylate (3l):** The product was obtained as a brown solid (125.0 mg, 71%), mp: 138–140 °C;  $^1\text{H}$  NMR (400 MHz,  $\text{CDCl}_3$ )  $\delta$  9.47 (s, 1H), 8.80 (s, 1H), 8.19 (d,  $J = 9.2$  Hz, 1H), 7.72 (d,  $J = 8.7$  Hz, 1H), 7.38–7.37 (m, 5H), 7.26–7.21 (m, 5H), 4.47 (q,  $J = 7.2$  Hz, 2H), 1.46 (t,  $J = 7.1$  Hz, 3H);  $^{13}\text{C}$  NMR (100 MHz,  $\text{CDCl}_3$ )  $\delta$  165.3, 152.2, 152.0, 139.7, 137.4, 136.1, 130.5, 130.0, 129.9, 129.6, 129.2, 128.1, 127.8, 127.1, 127.0, 126.9, 126.0, 125.4, 60.8, 13.8.; HRMS (ESI)  $[\text{M}+\text{H}]^+$  Calcd for  $\text{C}_{24}\text{H}_{20}\text{NO}_2$ : 354.1494, found 354.1512.



**3,4-Bis(4-fluorophenyl)isoquinolines (3m):** The product was obtained as a white solid (133.1 mg, 84%), mp: 148–150 °C;  $^1\text{H}$  NMR (400 MHz,  $\text{CDCl}_3$ )  $\delta$  9.37 (s, 1H), 8.08–8.06 (m, 1H), 7.66–7.62 (m, 3H), 7.36–7.32 (m, 2H), 7.24–7.20 (m, 2H), 7.10 (t,  $J=9.1$  Hz, 2H), 6.93 (t,  $J=8.3$  Hz, 2H);  $^{13}\text{C}$  NMR (100 MHz,  $\text{CDCl}_3$ )  $\delta$  162.1 (d,  $J_{\text{C-F}} = 247.3$  Hz), 162.0 (d,  $J_{\text{C-F}} = 247.3$  Hz), 151.9, 149.7, 135.9, 132.7 (d,  $J_{\text{C-F}} = 7.7$  Hz), 131.9 (d,  $J_{\text{C-F}} = 8.6$  Hz), 129.6, 127.7, 127.4, 127.1, 125.2, 115.6 (d,  $J_{\text{C-F}} = 22.0$  Hz), 114.7 (d,  $J_{\text{C-F}} = 21.1$  Hz), HRMS (ESI)  $[\text{M}+\text{H}]^+$  Calcd for  $\text{C}_{21}\text{H}_{14}\text{NF}_2$ : 318.1094, found 318.1097.



**3,4-Di(thiophen-2-yl)isoquinolines (3n):** The product was obtained as a brown solid (121.6 mg, 83%), mp: 114–116 °C;  $^1\text{H}$  NMR (400 MHz,  $\text{CDCl}_3$ )  $\delta$  9.25 (s, 1H), 7.91 (d,  $J = 7.6$  Hz, 1H), 7.60–7.54 (m, 3H), 7.51–7.47 (m, 1H), 7.30 (d,  $J = 4.5$  Hz, 1H), 7.26–7.24 (m, 1H), 7.09–7.08 (m, 1H), 6.90 (t,  $J = 3.8$  Hz, 1H), 6.71 (d,  $J = 3.8$  Hz, 1H);  $^{13}\text{C}$  NMR (100 MHz,  $\text{CDCl}_3$ )  $\delta$  152.3, 145.4, 144.5, 137.5, 137.3, 130.9, 128.9, 127.8, 127.7, 127.4, 127.34, 127.27, 126.7, 126.6, 125.2, 120.3.; HRMS (ESI)  $[\text{M}+\text{H}]^+$  Calcd for  $\text{C}_{17}\text{H}_{12}\text{NS}_2$ : 294.0411, found 294.0410.



**3,4-Di(pyridin-4-yl)isoquinoline (3o):** The product was obtained as a light yellow solid (101.8 mg, 72% ), mp: 176–178 °C;  $^1\text{H}$  NMR (400 MHz,  $\text{CDCl}_3$ )  $\delta$  9.35 (s, 1H), 8.59 (d,  $J = 6.0$  Hz, 2H), 8.40 (d,  $J = 5.9$  Hz, 2H), 8.02–8.06 (m, 1H), 7.62–7.67 (m, 2H), 7.50–7.53 (m, 1H), 7.20 (dd,  $J = 4.5, 1.6$  Hz, 2H), 7.16 (dd,  $J = 4.4, 1.6$  Hz, 2H);  $^{13}\text{C}$  NMR (100 MHz,  $\text{CDCl}_3$ )  $\delta$  153.1, 150.2, 149.5, 147.7, 147.5, 145.2, 134.8, 131.6, 128.9, 128.4, 128.2, 128.0, 127.7, 127.3, 126.9, 126.1, 125.0, 124.8; HRMS (ESI)  $[\text{M}+\text{H}]^+$  Calcd for  $\text{C}_{19}\text{H}_{14}\text{N}_3$ : 284.1188, found 284.1186.



**3-(4-Methoxyphenyl)-4-phenylisoquinoline (4a).** The product was obtained as a white solid (138.39 mg, 89%), mp: 157–159 °C  $^1\text{H}$  NMR (400 MHz,  $\text{CDCl}_3$ )  $\delta$  9.23 (s, 1H), 7.88 (d,  $J$  = 6.8 Hz, 1H), 7.52 (d,  $J$  = 7.6 Hz, 1H), 7.46–7.40 (m, 2H), 7.27–7.21 (m, 5H), 7.13 (d,  $J$  = 7.6 Hz, 2H), 6.62 (d,  $J$  = 8.8 Hz, 2H), 3.61 (s, 3H);  $^{13}\text{C}$  NMR (100 MHz,  $\text{CDCl}_3$ )  $\delta$  158.5, 151.5, 150.0, 137.3, 135.8, 133.0, 131.4, 131.0, 130.0, 129.8, 128.3, 127.4, 127.1, 127.0, 126.5, 126.3, 112.9, 54.9. HRMS (ESI)  $[\text{M}+\text{H}]^+$  Calcd for  $\text{C}_{22}\text{H}_{18}\text{NO}$ : 312.1388, found 312.1383



**4-(4-Phenylisoquinolin-3-yl)aniline (4b)** The product was obtained as a light-green solid (118.5 mg, 80% yield), mp: 145–147 °C;  $^1\text{H}$  NMR (400 MHz,  $\text{CDCl}_3$ )  $\delta$  9.33 (s, 1H), 8.02–8.00 (m, 1H), 7.66–7.53 (m, 4H), 7.40–7.31 (m, 3H), 7.27–7.25 (m, 3H), 7.17 (d,  $J$  = 8.4 Hz, 2H), 6.51 (d,  $J$  = 8.4 Hz, 2H);  $^{13}\text{C}$  NMR (100 MHz,  $\text{CDCl}_3$ )  $\delta$  151.5, 150.4, 145.4, 137.7, 136.1, 131.4, 131.2, 130.9, 130.4, 129.7, 128.3, 127.5, 127.1, 127.0, 126.4, 125.4, 114.4, HRMS (ESI)  $[\text{M}+\text{H}]^+$  Calcd for  $\text{C}_{21}\text{H}_{17}\text{N}_2$ : 297.1392, found 297.1396.



**3-(3,4-Dimethoxyphenyl)-4-phenylisoquinoline (4c):** The product was obtained as a white solid (148.3 mg, 87% yield), mp: 133–135 °C;  $^1\text{H}$  NMR (400 MHz,  $\text{CDCl}_3$ )  $\delta$  9.33 (s, 1H), 8.01–7.99 (m, 1H), 7.64–7.62 (m, 1H), 7.59–7.53 (m, 2H), 7.39–7.33 (m, 3H), 7.26–7.24 (m, 2H), 7.08 (dd,  $J$  = 9.9, 8.3 Hz, 1H), 6.81–6.80 (m, 1H), 6.74 (d,  $J$  = 8.3 Hz, 1H), 3.81 (s, 3H), 3.55 (s, 3H);  $^{13}\text{C}$  NMR (100 MHz,  $\text{CDCl}_3$ )  $\delta$  151.6, 149.8, 148.0, 147.7, 137.6, 136.0, 133.0, 131.1, 130.4, 130.0, 128.5, 127.5, 127.3, 127.1, 126.6, 125.4, 123.0, 113.6, 110.3, 55.7, 55.4. HRMS (ESI)  $[\text{M}+\text{H}]^+$  Calcd for  $\text{C}_{23}\text{H}_{20}\text{NO}_2$ : 342.1494, found 342.1486



**4-Phenyl-3-(4-(trifluoromethyl)phenyl)isoquinolines (4d):** The product was obtained as a white solid (121.8 mg, 70% yield), mp: 176–178 °C;  $^1\text{H}$  NMR (400 MHz,

CDCl<sub>3</sub>)  $\delta$  9.28 (s, 1H), 7.97–7.94 (m, 1H), 7.60–7.51 (m, 3H), 7.41–7.35 (m, 4H), 7.30–7.25 (m, 3H), 7.15–7.12 (m, 2H); <sup>13</sup>C NMR (100 MHz, CDCl<sub>3</sub>)  $\delta$  151.5, 148.9, 144.3, 138.1 (q,  $J_{C-F}$  = 240 Hz, 1C), 136.6, 135.8, 131.2, 131.1, 130.8, 128.9 (q,  $J_{C-F}$  = 32.6 Hz, 1C), 128.5, 127.7, 127.6 (q,  $J_{C-F}$  = 3.83 Hz, 1C), 127.5, 127.4, 125.7, 124.5 (q,  $J$  = 3.8 Hz, 1C), 122.8. HRMS (ESI) [M+H]<sup>+</sup> Calcd for C<sub>22</sub>H<sub>15</sub>F<sub>3</sub>N: 349.1078, found 349.1078.



**3-(4-Fluorophenyl)-4-phenylisoquinoline (4e):** The product was obtained as a off-white solid (107.6 mg, 72% yield), mp: 114–116 °C; <sup>1</sup>H NMR (400 MHz, CDCl<sub>3</sub>)  $\delta$  9.27 (s, 1H), 7.98–7.95 (m, 1H), 7.60–7.51 (m, 3H), 7.33–7.25 (m, 5H), 7.18–7.14 (m, 2H), 6.84–6.79 (m, 2H); <sup>13</sup>C NMR (100 MHz, CDCl<sub>3</sub>)  $\delta$  161.0 (d,  $J_{C-F}$  = 248 Hz), 150.8, 148.5, 136.1, 135.8, 134.9, 131.0 (d,  $J_{C-F}$  = 7.7 Hz), 130.2, 129.7, 127.5, 126.6, 126.5, 126.4, 126.0, 124.6, 113.6, (d,  $J_{C-F}$  = 21.0 Hz); HRMS (ESI) [M+H]<sup>+</sup> Calcd for C<sub>21</sub>H<sub>15</sub>FN: 300.1189, found 300.1198.



**3-(3,5-Bis(trifluoromethyl)phenyl)-4-phenylisoquinoline (4f):** The product was obtained as a off-white solid (135.5 mg, 65% yield), mp: 95–97 °C; <sup>1</sup>H NMR (400 MHz, CDCl<sub>3</sub>)  $\delta$  9.30 (s, 1H), 8.00–7.97 (m, 1H), 7.78 (s, 2H), 7.60–7.57 (m, 3H), 7.33–7.31 (m, 3H), 7.15–7.13 (m, 2H); <sup>13</sup>C NMR (100 MHz, CDCl<sub>3</sub>)  $\delta$  151.3, 146.0, 141.5, 135.1, 134.8, 130.8, 130.3, 130.1, 130.0, 129.9, 129.6, 129.5 (q,  $J_{C-F}$  = 2.9 Hz, 1C), 127.9, 127.2, 126.8, 126.6, 124.8, 123.6, 120.9, 119.7 (q,  $J_{C-F}$  = 3.8 Hz, 1C); HRMS (ESI) [M+H]<sup>+</sup> Calcd for C<sub>23</sub>H<sub>14</sub>F<sub>6</sub>N: 418.1030, found 418.1023.



**3-(3-Fluoro-5-(trifluoromethyl)phenyl)-4-phenylisoquinoline (4g):** The product was obtained as a off-white solid (115.6 mg, 63% yield), mp: 118–120 °C; <sup>1</sup>H NMR (400 MHz, CDCl<sub>3</sub>)  $\delta$  9.29 (s, 1H), 8.01–7.99 (m, 1H), 7.64–7.56 (m, 3H), 7.35–7.33 (m, 4H), 7.25 (d,  $J$  = 9.9 Hz, 1H), 7.17–7.15 (m, 2H), 7.06 (d,  $J$  = 8.3 Hz, 1H); <sup>13</sup>C NMR (100 MHz, CDCl<sub>3</sub>)  $\delta$  161.9 (d,  $J_{C-F}$  = 247 Hz), 152.1, 147.4, 143.9 (d,  $J_{C-F}$  = 7.7 Hz, 1C), 136.2, 135.8, 135.6, 131.0, 130.9, 128.7, 128.0, 127.8, 127.7, 127.6, 125.8, 123.1 (q,  $J_{C-F}$  = 2.9 Hz,

1C), 120.6 (d,  $J_{C-F} = 22.0$  Hz, 1C), 111.5, 111.2. HRMS (ESI)  $[M+H]^+$  Calcd for  $C_{22}H_{14}F_4N$ : 368.1062, found 368.1056.



**3-(Benzo[d][1,3]dioxol-5-yl)-7-bromo-4-phenylisoquinoline (4i):**

The product was obtained as a light yellow (161.2 mg, 80% yield), mp: 159–161 °C;  $^1H$  NMR (400 MHz,  $CDCl_3$ )  $\delta$  9.24 (s, 1H), 8.17–8.16 (m, 1H), 7.65–7.62 (m, 1H), 7.51 (d,  $J = 9.1$  Hz, 1H), 7.42–7.37 (m, 3H), 7.24–7.21 (m, 2H), 6.89 (s, 1H), 6.82 (dd,  $J = 8.3, 9.9$  Hz, 1H), 6.63 (d,  $J = 8.3$  Hz, 1H), 5.89 (s, 2H);  $^{13}C$  NMR (100 MHz,  $CDCl_3$ )  $\delta$  150.5, 150.4, 147.1, 146.9, 136.7, 134.5, 134.3, 133.8, 130.9, 130.2, 129.5, 128.5, 128.2, 127.6, 127.5, 124.4, 120.6, 110.6, 107.6, 100.9; HRMS (ESI)  $[M+H]^+$  Calcd for  $C_{22}H_{15}BrNO_2$ : 404.0286, found 404.0267.



**7-Chloro-4-phenyl-3-(3,4,5-trimethoxyphenyl)isoquinolines (4i):**

The product was obtained as a white solid (170.1 mg, 84% yield), mp: 118–120 °C;  $^1H$  NMR (400 MHz,  $CDCl_3$ )  $\delta$  9.26 (s, 1H), 8.00–7.99 (m, 1H), 7.61–7.58 (m, 1H), 7.52–7.51 (m, 1H), 7.42–7.33 (m, 3H), 7.25–7.24 (m, 2H), 6.62 (s, 2H), 3.78 (s, 3H), 3.60 (s, 6H);  $^{13}C$  NMR (100 MHz,  $CDCl_3$ )  $\delta$  152.4, 150.5, 150.2, 137.3, 137.1, 135.3, 134.4, 132.6, 131.4, 130.9, 130.3, 128.7, 128.1, 127.9, 127.6, 127.5, 126.1, 125.6, 107.7, 60.8, 60.4, 55.8; HRMS (ESI)  $[M+H]^+$  Calcd for  $C_{24}H_{21}ClNO_3$ : 406.1210, found 406.1208



**Methyl 4-(7-chloro-4-phenylisoquinolin-3-yl)benzoate (4j):**

The product was obtained as a white solid (138.0 mg, 74% yield), mp: 202–204 °C;  $^1H$  NMR (400 MHz,  $CDCl_3$ )  $\delta$  9.30 (s, 1H), 8.05–8.04 (m, 1H), 7.88 (d,  $J = 8.3$  Hz, 2H), 7.65–7.63 (m, 1H), 7.57–7.54 (m, 1H), 7.44–7.36 (m, 5H), 7.26–7.25 (m, 1H), 7.22–7.19 (m, 1H), 3.88 (s, 3H);  $^{13}C$  NMR (100 MHz,  $CDCl_3$ )  $\delta$  166.9, 150.8, 149.8, 144.9, 136.2, 134.2, 133.1, 131.6, 131.0, 130.2, 129.0, 128.7, 128.6, 128.13, 128.08, 127.9, 127.7, 126.2, 125.6, 52.0; HRMS (ESI)  $[M+H]^+$  Calcd for  $C_{23}H_{17}ClNO_2$ : 374.0948, found 374.0944.



**4-(7-Chloro-4-phenylisoquinolin-3-yl)benzonitrile (4k):** The product was obtained as a white solid (130.9 mg, 77% yield), mp: 173–175 °C;  $^1\text{H}$  NMR (400 MHz,  $\text{CDCl}_3$ )  $\delta$  9.22 (s, 1H), 7.97 (d,  $J$  = 2.3 Hz, 1H), 7.57 (d,  $J$  = 8.4 Hz, 1H), 7.51–7.48 (m, 1H), 7.42–7.37 (m, 4H), 7.33–7.32 (m, 3H), 7.12–7.14 (m, 2H);  $^{13}\text{C}$  NMR (100 MHz,  $\text{CDCl}_3$ )  $\delta$  150.0, 147.7, 143.9, 134.8, 133.1, 132.5, 130.8, 130.5, 129.9, 129.8, 127.8, 127.3, 127.2, 126.7, 125.2, 117.8, 109.9; HRMS (ESI)  $[\text{M}+\text{H}]^+$  Calcd for  $\text{C}_{22}\text{H}_{14}\text{ClN}_2$ : 341.0846, found 341.0839.



**4-Phenyl-3-(thiophen-2-yl)isoquinoline (4l):** The product was obtained as a brown solid (121.4 mg, 85% yield), mp: 166–168 °C;  $^1\text{H}$  NMR (400 MHz,  $\text{CDCl}_3$ )  $\delta$  9.27 (s, 1H), 7.99–7.97 (m, 1H), 7.57–7.52 (m, 5H), 7.42–7.40 (m, 1H), 7.35–7.33 (m, 2H), 7.24 (d,  $J$  = 4.5 Hz, 1H), 6.81 (t,  $J$  = 4.5 Hz, 1H), 6.41 (d,  $J$  = 3.8 Hz, 1H);  $^{13}\text{C}$  NMR (100 MHz,  $\text{CDCl}_3$ )  $\delta$  151.6, 145.3, 143.6, 137.3, 136.5, 130.6, 130.3, 129.3, 128.2, 128.1, 127.7, 127.5, 127.3, 127.1, 127.0, 126.7, 125.6 ; HRMS (ESI)  $[\text{M}+\text{H}]^+$  Calcd for  $\text{C}_{19}\text{H}_{14}\text{NS}$ : 288.0847, found 288.0851.



**7-Chloro-4-phenyl-3-(thiophen-2-yl)isoquinoline (4m):** The product was obtained as a light-brown solid (134.8 mg, 84% yield), mp: 199–200 °C;  $^1\text{H}$  NMR (400 MHz,  $\text{CDCl}_3$ )  $\delta$  9.19 (s, 1H), 7.96 (s, 1H), 7.59–7.55 (m, 3H), 7.47 (dd,  $J$  = 9.2, 2.3 Hz, 1H), 7.36–7.26 (m, 4H), 6.81 (t,  $J$  = 4.6 Hz, 1H), 6.41 (d,  $J$  = 3.8 Hz, 1H);  $^{13}\text{C}$  NMR (100 MHz,  $\text{CDCl}_3$ )  $\delta$  150.5, 144.9, 144.0, 136.8, 134.9, 132.5, 131.5, 130.2, 129.4, 128.5, 127.9, 127.7, 127.5, 127.50, 127.46, 126.2.; HRMS (ESI)  $[\text{M}+\text{H}]^+$  Calcd for  $\text{C}_{19}\text{H}_{13}\text{NSCl}$ : 322.0457, found 322.0455.



**7-Bromo-4-phenyl-3-(thiophen-2-yl)isoquinoline (4n):** The product was obtained as a light yellow solid (143.7 mg, 79% yield), mp: 196–198 °C;  $^1\text{H}$  NMR (400 MHz,  $\text{CDCl}_3$ )  $\delta$  9.18 (s, 1H), 8.12 (s, 1H), 7.60–7.55 (m, 4H), 7.16 (q,  $J$  = 8.1 Hz, 3H), 6.81 (t,  $J$  = 3.8 Hz, 1H), 6.44 (d,  $J$  = 3.8 Hz, 1H);  $^{13}\text{C}$  NMR (100 MHz,  $\text{CDCl}_3$ )  $\delta$  150.4, 144.9, 136.7, 134.0, 130.2, 129.50, 129.45, 128.5, 128.2, 128.1, 127.9, 127.7, 127.6, 127.6, 127.5, 127.0, 125.6, 120.6; HRMS (ESI)  $[\text{M}+\text{H}]^+$  Calcd for  $\text{C}_{19}\text{H}_{13}\text{NBrS}$ : 365.9952, found 365.9922.



**3-(Pyridin-4-yl)-4-(thiophen-2-yl)isoquinoline (4o):** The product was obtained as a brown solid (118.0 mg, 82% yield), mp: 167–169 °C;  $^1\text{H}$  NMR (400 MHz,  $\text{CDCl}_3$ )  $\delta$  9.27 (s, 1H), 8.43 (d,  $J$  = 5.3 Hz, 2H), 7.97 (d,  $J$  = 7.6 Hz, 1H), 7.82 (d,  $J$  = 8.4 Hz, 1H), 7.64–7.56 (m, 2H), 7.35 (d,  $J$  = 3.8 Hz, 1H), 7.30 (q,  $J$  = 2.0 Hz, 2H), 7.01 (q,  $J$  = 2.8 Hz, 1H), 6.92 (d,  $J$  = 2.3 Hz, 1H);  $^{13}\text{C}$  NMR (100 MHz,  $\text{CDCl}_3$ )  $\delta$  152.8, 149.2, 149.1, 148.4, 136.6, 136.5, 131.2, 129.9, 127.9, 127.6, 127.5, 127.4, 127.3, 125.5, 124.5, 124.2, HRMS (ESI):  $(\text{M}+\text{H})^+$  Calcd for  $\text{C}_{18}\text{H}_{13}\text{N}_2\text{S}$ : 289.0799, found 289.0799.



**3-(1-methyl-1H-indol-3-yl)-4-phenylisoquinoline (4p):** The product was obtained as a reddish solid (138.6 mg, 83% yield), mp: 176–178 °C;  $^1\text{H}$  NMR (400 MHz,  $\text{CDCl}_3$ )  $\delta$  9.44 (s, 1H), 8.46–8.44 (m, 1H), 8.03–8.01 (m, 1H), 7.55–7.52 (m, 3H), 7.46 (t,  $J$  = 5.7 Hz, 3H), 7.37–7.35 (m, 2H), 7.26–7.21 (m, 3H), 6.25 (s, 1H), 3.55 (s, 3H);  $^{13}\text{C}$  NMR (100 MHz,  $\text{CDCl}_3$ )  $\delta$  151.5, 146.8, 138.5, 136.5, 136.2, 130.8, 130.5, 130.0, 128.8, 128.7, 127.9, 127.4, 126.2, 125.8, 125.1, 122.2, 121.8, 120.1, 114.8, 108.9, 32.7; HRMS (ESI)  $[\text{M}+\text{H}]^+$  Calcd for  $\text{C}_{24}\text{H}_{19}\text{N}_2$ : 335.1548, found 335.1552.



**4-Phenyl-3-(pyridin-4-yl)isoquinoline (4q):** The product was obtained as a white solid (114.2 mg, 81% yield), mp: 152–154 °C;  $^1\text{H}$  NMR (400 MHz,  $\text{CDCl}_3$ )  $\delta$  9.27 (s,

1H), 8.34 (s, 2H), 7.97–7.95 (m, 1H), 7.60–7.53 (m, 3H), 7.30–7.28 (m, 3H), 7.18–7.17 (m, 2H), 7.14–7.12 (m, 2H); <sup>13</sup>C NMR (100 MHz, CDCl<sub>3</sub>) δ 152.1, 149.1, 148.4, 147.4, 136.2, 135.7, 131.7, 130.9, 130.9, 128.6, 127.9, 127.8, 127.6, 127.5, 125.7, 124.7. HRMS (ESI) [M+H]<sup>+</sup> Calcd for C<sub>20</sub>H<sub>15</sub>N<sub>2</sub>: 283.1235, found 283.1230.



**4-(4-(*ter*-Butyl)phenyl)-3-phenylisoquinoline (4r):** The product was obtained as a white solid (143.2 mg, 85% yield), mp: 145–147 °C; <sup>1</sup>H NMR (400 MHz, CDCl<sub>3</sub>) δ 9.39 (s, 1H), 8.08–8.06 (m, 1H), 7.78–7.76 (m, 1H), 7.67–7.61 (m, 2H), 7.42–7.40 (m, 4H), 7.24–7.19 (m, 5H), 1.39 (s, 9H); <sup>13</sup>C NMR (100 MHz, CDCl<sub>3</sub>) δ 151.5, 150.6, 150.3, 140.8, 136.1, 134.0, 130.8, 130.7, 130.4, 130.3, 127.5, 127.5, 127.4, 126.9, 126.8, 125.8, 125.1, 34.6, 31.4; HRMS (ESI) [M+H]<sup>+</sup> Calcd for C<sub>25</sub>H<sub>24</sub>N: 338.1909, found 338.1896.

#### General Procedure for the Synthesis of Functionalized 2-Azaphenethrene 5a–j.

In an oven-dried round bottom flask, a solution of 2-aryl-1-naphthaldehyde substrates **1** (0.5 mmol), benzylamine derivatives **2** (0.6 mmol) and 1.2 equiv of crushed KOH in 2.0 mL of DMSO were added under standard reaction condition. The resulting reaction mixture was heated at 25 °C for 1 h. Progression of the reaction was monitored by TLC analysis; after complete consumption of starting material, the reaction was cooled to room temperature. The reaction mixture was diluted with ethyl acetate (10 mL) and water (15 mL). The layers were separated, and the organic layer was washed with aqueous saturated brine solution and dried over Na<sub>2</sub>SO<sub>4</sub>. Organic layer was concentrated under reduced pressure. The crude material so obtained was purified by column chromatography on silica gel (100–200) (hexane:ethyl acetate; 90/10).





**3,4-diphenylbenzo[h]isoquinoline (5a).** The product was obtained as white solid (140.6 mg, 85%), mp: 152–154 °C;  $^1\text{H}$  NMR (400 MHz,  $\text{CDCl}_3$ )  $\delta$  10.13 (s, 1H), 8.85 (d,  $J$  = 8.4 Hz, 1H), 7.90 (d,  $J$  = 8.4 Hz, 1H), 7.82 (d,  $J$  = 9.2 Hz, 1H), 7.76 (t,  $J$  = 6.9 Hz, 1H), 7.66 (t,  $J$  = 8.4 Hz, 1H), 7.55 (d,  $J$  = 9.2 Hz, 1H), 7.40–7.34 (m, 5H), 7.27–7.19 (m, 5H);  $^{13}\text{C}$  NMR (100 MHz,  $\text{CDCl}_3$ )  $\delta$  152.8, 145.8, 140.6, 137.4, 135.5, 131.6, 131.5, 131.4, 131.3, 130.1, 129.2, 128.7, 128.3, 128.0, 127.6, 127.5, 127.4, 127.2, 123.5, 123.4, 122.1; HRMS (ESI)  $[\text{M}+\text{H}]^+$  Calcd for  $\text{C}_{25}\text{H}_{18}\text{N}$ : 332.1439, found 332.1406.



**3-(4-methoxyphenyl)-4-phenylbenzo[h]isoquinoline (5b).** The product was obtained as a off-white solid (162.4 mg, 90%), mp: 195–197 °C;  $^1\text{H}$  NMR (400 MHz,  $\text{CDCl}_3$ )  $\delta$  10.02 (s, 1H), 8.75 (d,  $J$  = 9.9 Hz, 1H), 7.82 (d,  $J$  = 9.9 Hz, 1H), 7.73 (d,  $J$  = 9.2 Hz, 1H), 7.67 (t,  $J$  = 7.2 Hz, 1H), 7.58 (t,  $J$  = 6.9 Hz, 1H), 7.45 (d,  $J$  = 9.2 Hz, 1H), 7.33–7.31 (m, 2H), 7.26 (d,  $J$  = 9.2 Hz, 2H), 7.19 (dd,  $J$  = 8.0, 1.9 Hz, 3H), 6.68 (d,  $J$  = 9.2 Hz, 2H), 3.69 (s, 3H);  $^{13}\text{C}$  NMR (100 MHz,  $\text{CDCl}_3$ )  $\delta$  157.8, 151.3, 144.7, 136.7, 134.6, 132.0, 130.5, 130.4, 130.4, 130.3, 130.1, 129.1, 128.3, 127.7, 127.4, 126.9, 126.3, 125.4, 122.4, 122.2, 121.1, 112.5, 112.1, 54.1; HRMS (ESI)  $[\text{M}+\text{H}]^+$  Calcd for  $\text{C}_{26}\text{H}_{20}\text{NO}$ : 362.1545, found 362.1548.



**3-(4-Fluorophenyl)-4-phenylbenzo[h]isoquinoline (5c).** The product was obtained as a brown solid (146.5 mg, 84%), mp: 120–122 °C;  $^1\text{H}$  NMR (400 MHz,  $\text{CDCl}_3$ )  $\delta$  9.91 (s, 1H), 8.68 (d,  $J$  = 8.4 Hz, 1H), 7.81 (d,  $J$  = 13.0 Hz, 1H), 7.73 (d,  $J$  = 9.2 Hz, 1H), 7.64 (d,  $J$  = 8.4 Hz, 1H), 7.57 (t,  $J$  = 6.9 Hz, 1H), 7.43 (d,  $J$  = 9.2 Hz, 1H), 7.32–7.28 (m, 2H), 7.26–7.21 (m, 3H), 7.16–7.11 (m, 2H), 6.84–6.79 (m, 2H);  $^{13}\text{C}$  NMR (100 MHz,  $\text{CDCl}_3$ )  $\delta$  162.0 (d,  $J_{\text{C-F}}$  = 247 Hz), 151.5, 145.7, 137.2, 136.5, 135.5, 131.9 (d,  $J_{\text{C-F}}$  = 7.7 Hz), 131.7, 131.6, 131.5, 131.2, 130.5, 130.4, 129.1, 128.7, 128.4, 128.3, 128.0, 127.5, 126.9, 126.4, 123.3, 122.1, 114.6 (d,  $J_{\text{C-F}}$  = 22.0 Hz); HRMS (ESI)  $[\text{M}+\text{H}]^+$  Calcd for  $\text{C}_{25}\text{H}_{17}\text{NF}$ : 350.1345, found 350.1348.



**4-(4-Chlorophenyl)-3-phenylbenzo[*h*]isoquinoline (5d).** The product was obtained as a pale yellow solid (146.0 mg, 80%), mp: 222–224 °C;  $^1\text{H}$  NMR (400 MHz,  $\text{CDCl}_3$ )  $\delta$  10.13 (s, 1H), 8.76 (d,  $J$  = 8.4 Hz, 1H), 7.83 (d,  $J$  = 8.4 Hz, 1H), 7.76 (d,  $J$  = 9.2 Hz, 1H), 7.68 (t,  $J$  = 6.9 Hz, 1H), 7.59 (t,  $J$  = 8.4 Hz, 1H), 7.42 (d,  $J$  = 9.2 Hz, 1H), 7.29–7.26 (m, 4H), 7.20–7.14 (m, 3H), 7.12–7.08 (m, 2H);  $^{13}\text{C}$  NMR (100 MHz,  $\text{CDCl}_3$ )  $\delta$  151.8, 145.1, 139.3, 134.9, 134.3, 132.5, 131.7, 130.8, 130.6, 129.3, 129.1, 128.2, 127.8, 127.6, 127.1, 126.8, 126.6, 126.4, 122.6, 122.0, 121.2. HRMS (ESI)  $[\text{M}+\text{H}]^+$  Calcd for  $\text{C}_{25}\text{H}_{17}\text{ClN}$ : 366.1050, found 366.1055.



**3-(2-Chlorophenyl)-4-(4-chlorophenyl)benzo[*h*]isoquinoline (5e).** The product was obtained as a light-yellow solid (163.5 mg, 82%), mp: 210–212 °C;  $^1\text{H}$  NMR (400 MHz,  $\text{CDCl}_3$ )  $\delta$  10.03 (s, 1H), 8.75 (d,  $J$  = 8.4 Hz, 1H), 7.82 (d,  $J$  = 8.4 Hz, 1H), 7.77 (d,  $J$  = 9.2 Hz, 1H), 7.67 (t,  $J$  = 7.6 Hz, 1H), 7.59 (t,  $J$  = 7.6 Hz, 1H), 7.39 (d,  $J$  = 9.2 Hz, 1H), 7.24–7.15 (m, 3H), 7.12–7.03 (m, 4H);  $^{13}\text{C}$  NMR (100 MHz,  $\text{CDCl}_3$ )  $\delta$  151.7, 145.7, 139.4, 135.0, 134.8, 133.5, 133.1, 132.0, 131.7, 131.4, 129.3, 129.1, 129.0, 128.8, 128.6, 128.1, 127.7, 126.2, 124.1, 122.8, 122.2; HRMS (ESI)  $[\text{M}+\text{H}]^+$  Calcd for  $\text{C}_{25}\text{H}_{15}\text{Cl}_2\text{N}$ : 400.0660, found 400.0677.



**4-(4-Chlorophenyl)-3-(3,4,5-trimethoxyphenyl)benzo[*h*]isoquinoline (5f).** The product was obtained as light yellow solid (200.2 mg, 88%), mp: 202–204 °C;  $^1\text{H}$  NMR (400 MHz,  $\text{CDCl}_3$ )  $\delta$  10.16 (s, 1H), 8.88 (d,  $J$  = 7.6 Hz, 1H), 7.93 (d,  $J$  = 7.6 Hz, 1H), 7.87 (d,  $J$  = 9.2 Hz, 1H), 7.79 (t,  $J$  = 7.6 Hz, 1H), 7.59 (t,  $J$  = 7.6 Hz, 1H), 7.53 (d,  $J$  = 9.2 Hz, 1H), 7.42 (d,  $J$  = 8.4 Hz, 2H), 7.25 (d,  $J$  = 7.6 Hz, 2H), 6.63 (s, 2H), 3.84 (s, 3H), 3.68 (s, 6H);  $^{13}\text{C}$  NMR (100 MHz,  $\text{CDCl}_3$ )  $\delta$  152.5, 152.2, 146.0, 137.4, 136.3, 135.5, 135.4, 133.6,

132.6, 131.9, 131.6, 130.0, 129.2, 128.8, 128.2, 127.6, 123.6, 123.0, 122.1, 107.6, 60.9, 55.8. HRMS (ESI) (M+H)<sup>+</sup> Calcd for C<sub>28</sub>H<sub>23</sub>ClNO<sub>3</sub>: 456.1366, found 456.1358.



**3-Phenyl-4-(thiophen-2-yl)benzo[h]isoquinoline (5g).** The product was obtained as a brown solid (143.2 mg, 85%), mp: 196–198 °C; <sup>1</sup>H NMR (400 MHz, CDCl<sub>3</sub>) δ 10.02 (s, 1H), 8.73 (d, *J* = 12.2 Hz, 1H), 7.83–7.78 (m, 2H), 7.69–7.65 (m, 2H), 7.58 (t, *J* = 6.8 Hz, 1H), 7.42–7.40 (m, 2H), 7.33 (q, *J* = 3.8, 1.5 Hz, 1H), 7.25–7.16 (m, 3H), 7.03–7.00 (m, 1H), 6.95–6.93 (m, 1H); <sup>13</sup>C NMR (100 MHz, CDCl<sub>3</sub>) δ 154.2, 146.4, 140.6, 137.9, 136.6, 132.0, 131.7, 129.9, 129.6, 129.1, 128.7, 128.5, 128.1, 127.7, 127.6, 127.5, 127.0, 124.4, 123.4, 123.1, 122.1. HRMS (ESI) [M+H]<sup>+</sup> Calcd for C<sub>23</sub>H<sub>16</sub>NS: 338.1003, found 338.0997.



**3-(Pyridin-4-yl)-4-(thiophen-2-yl)benzo[h]isoquinoline (5h).** The product was obtained as brown solid (135.2 mg, 80%), mp: 205–207 °C; <sup>1</sup>H NMR (400 MHz, CDCl<sub>3</sub>) δ 10.06 (s, 1H), 8.75 (d, *J* = 8.4 Hz, 1H), 8.43 (d, *J* = 4.6 Hz, 2H), 7.85–7.82 (m, 2H), 7.71–7.66 (m, 2H), 7.61 (t, *J* = 8.4 Hz, 1H), 7.39–7.37 (m, 1H), 7.33–7.31 (m, 2H), 7.04–7.02 (m, 1H), 6.93–6.92 (m, 1H); <sup>13</sup>C NMR (100 MHz, CDCl<sub>3</sub>) δ 151.1, 149.2, 148.3, 146.8, 136.7, 136.6, 132.4, 131.9, 130.1, 128.8, 128.7, 128.3, 127.9, 127.6, 127.4, 125.1, 124.1, 122.9, 122.1. HRMS (ESI) [M+H]<sup>+</sup> Calcd for C<sub>22</sub>H<sub>16</sub>NS: 339.0956, found 339.0947.



**3-(Furan-2-yl)-4-(thiophen-2-yl)benzo[h]isoquinoline (5i).** The product was obtained as brown solid (147.1 mg, 90%), mp: 173–175 °C; <sup>1</sup>H NMR (400 MHz, CDCl<sub>3</sub>) δ 10.12 (s, 1H), 8.79 (d, *J* = 9.2 Hz, 1H), 7.85 (d, *J* = 7.6 Hz, 1H), 7.81 (d, *J* = 9.2 Hz, 1H), 7.73 (td, *J* = 8.4 and 1.5 Hz, 1H), 7.63 (d, *J* = 7.6 Hz, 1H), 7.60–7.59 (m, 1H), 7.54 (d, *J* = 2.4 Hz, 1H), 7.51 (d, *J* = 9.2 Hz, 1H), 7.28–7.25 (m, 1H), 7.09–7.08 (m, 1H), 6.35–6.34 (m, 1H), 5.80 (d, *J* = 3.0 Hz, 1H); <sup>13</sup>C NMR (100 MHz, CDCl<sub>3</sub>) δ 151.8, 146.9, 144.2, 143.1, 137.4,

137.2, 132.0, 131.6, 128.9, 128.7, 128.1, 127.8, 127.5, 127.3, 122.9, 122.8, 122.0, 121.9, 111.8, 111.7. HRMS (ESI)  $[M+H]^+$  Calcd for  $C_{21}H_{14}NSO$ : 328.0796, found 328.0790



**3,4-Di(thiophen-2-yl)benzo[h]isoquinoline (5j).** The product was obtained as brown solid (157.7 mg, 92%), mp: 156–158 °C;  $^1H$  NMR (400 MHz,  $CDCl_3$ )  $\delta$  10.06 (s, 1H), 8.80 (d,  $J = 7.6$  Hz, 1H), 7.89 (d,  $J = 7.6$  Hz, 1H), 7.84 (d,  $J = 9.2$  Hz, 1H), 7.75 (t,  $J = 7.2$  Hz, 1H), 7.66 (d,  $J = 8.4$  Hz, 1H), 7.63 (d,  $J = 6.1$  Hz, 1H), 7.52 (d,  $J = 9.2$  Hz, 1H), 7.34 (d,  $J = 5.3$  Hz, 1H), 7.30 (q,  $J = 3.1$  Hz, 1H), 7.14 (t,  $J = 1.9$  Hz, 1H), 6.92 (t,  $J = 4.6$  Hz, 1H), 6.67 (d,  $J = 3.8$  Hz, 1H);  $^{13}C$  NMR (100 MHz,  $CDCl_3$ )  $\delta$  147.5, 146.6, 144.6, 137.7, 137.5, 132.0, 131.6, 129.2, 129.1, 128.8, 128.2, 128.0, 127.9, 127.7, 127.5, 123.0, 123.0, 122.0, 121.4; HRMS (ESI)  $[M+H]^+$  Calcd for  $C_{21}H_{14}NS_2$ : 344.0568, found 344.0562.

#### General Procedure for the Synthesis of 3-alkynyl and alkenyl substituted isoquinolines 6a–c.



**3-Ethynyl-4-phenylisoquinoline (6a):** The product was obtained as a brown solid (68.7 mg, 60% yield); mp: 138–140 °C;  $^1H$  NMR (400 MHz,  $CDCl_3$ )  $\delta$  9.21 (s, 1H), 7.99–7.96 (m, 1H), 7.60–7.55 (m, 3H), 7.53–7.42 (m, 5H), 3.05 (s, 1H);  $^{13}C$  NMR (100 MHz,  $CDCl_3$ )  $\delta$  152.27, 136.88, 135.93, 134.95, 134.11, 131.09, 130.46, 128.43, 128.32, 128.04, 127.87, 127.82, 125.60, 82.94, 80.22; HRMS (ESI)  $[M+H]^+$  Calcd for  $C_{17}H_{12}N$ : 230.0970, found 230.0978.



**7-Bromo-3-ethynyl-4-phenylisoquinoline (6b):** The product was obtained as a light yellow solid (95.7 mg, 62% yield), mp: 141–143 °C;  $^1H$  NMR (400 MHz,  $CDCl_3$ )  $\delta$  9.06 (s, 1H), 8.07 (dd,  $J = 9.2, 1.8$  Hz, 1H), 7.60 (dd,  $J = 9.2, 1.8$  Hz, 1H), 7.33–7.48 (m, 6H),

3.00 (s, 1H).;  $^{13}\text{C}$  NMR (100 MHz,  $\text{CDCl}_3$ )  $\delta$  150.9, 136.7, 135.2, 134.5, 134.4 133.4, 130.2, 129.8, 129.2, 128.6, 128.4, 127.4, 122.0, 82.4, 80.6.; HRMS (ESI)  $[\text{M}+\text{H}]^+$  Calcd for  $\text{C}_{17}\text{H}_{11}\text{NBr}$ : 308.0075, found 310.0065 ( $^{81}\text{Br}$ ).



**4-Phenyl-3-vinylisoquinoline (6c):** The product was obtained as a off-white (66.6 mg, 58% yield), mp: 98–100 °C;  $^1\text{H}$  NMR (400 MHz,  $\text{CDCl}_3$ )  $\delta$  9.18 (s, 1H), 7.92–7.90 (m, 1H), 7.48–7.36 (m, 6H), 7.24 (dt,  $J$  = 6.1 and 1.6 Hz, 2H), 6.62 (dd,  $J$  = 17.2 and 10.8 Hz, 1H), 6.40 (dd,  $J$  = 16.9 and 2.3 Hz, 1H), 5.28 (dd,  $J$  = 10.5 and 2.3 Hz, 1H);  $^{13}\text{C}$  NMR (100 MHz,  $\text{CDCl}_3$ )  $\delta$  151.9, 145.9, 136.5, 135.9, 134.4, 130.6, 130.4, 128.5, 127.72, 127.69, 127.6, 126.7, 125.7, 118.1.; HRMS (ESI)  $[\text{M}+\text{H}]^+$  Calcd for  $\text{C}_{17}\text{H}_{14}\text{N}$ : 232.1126, found 232.1128.

### General Procedure for the Synthesis of Functionalized Bis-isoquinolines 7a–e.



**1,4-Bis(4-phenylisoquinolin-3-yl)benzene (7a):** The product was obtained as a off-white solid (205.7 mg, 85% yield), mp: 202–204 °C;  $^1\text{H}$  NMR (400 MHz,  $\text{CDCl}_3$ )  $\delta$  9.33 (s, 1H), 8.06–8.04 (m, 2H), 7.65–7.60 (m, 5H), 7.33–7.30 (m, 4H), 7.22–7.17 (m, 4H), 7.12–7.07 (m, 4H), 6.94–6.90 (m, 4H);  $^{13}\text{C}$  NMR (100 MHz,  $\text{CDCl}_3$ )  $\delta$  151.9, 149.7, 136.5, 135.9, 132.9, 132.8, 132.7, 132.6, 131.9, 131.8, 130.8, 129.6, 127.7, 127.3, 127.1, 125.2,. HRMS (ESI)  $[\text{M}+\text{H}]^+$  Calcd for  $\text{C}_{36}\text{H}_{25}\text{N}_2$ : 485.2018, found 485.1978.



**1,4-Bis(7-bromo-4-phenylisoquinolin-3-yl)benzene (7b):**

The product was obtained as yellow solid (252.8 mg, 79% yield), mp: 194–196 °C;  $^1\text{H}$  NMR (400 MHz,  $\text{CDCl}_3$ )  $\delta$  9.23 (s, 2H), 8.18 (d,  $J$  = 1.5 Hz, 2H), 7.64 (dd,  $J$  = 9.2 and 1.5 Hz, 2H), 7.52–7.50 (m, 2H), 7.35–7.30 (m, 6H), 7.21 (s, 4H), 7.17–7.14 (m, 4H), 6.99–6.96 (m, 2H);  $^{13}\text{C}$  NMR (100 MHz,  $\text{CDCl}_3$ )  $\delta$  150.5, 150.4, 139.1, 136.4, 134.5, 134.0, 133.9, 131.1, 130.8, 130.6, 129.6, 129.5, 129.2, 128.5, 128.3, 127.8, 127.7, 127.6, 120.8. HRMS (ESI)  $[\text{M}+\text{H}]^+$  Calcd for  $\text{C}_{36}\text{H}_{23}\text{Br}_2\text{N}_2$ : 641.0228, found 641.0244 ( $^{79}\text{Br}$ ).



**1,3-bis(4-phenylisoquinolin-3-yl)benzene (7c):**

The product was obtained as a brown solid (193.6 mg, 80% yield), mp: 188–190 °C;  $^1\text{H}$  NMR (400 MHz,  $\text{CDCl}_3$ )  $\delta$  9.31 (s, 2H), 8.03 (dd,  $J$  = 5.7, 4.2 Hz, 2H), 7.55–7.68 (m, 7H), 7.28–7.36 (m, 7H), 7.16 (dd,  $J$  = 7.6, 1.5 Hz, 4H), 7.08 (dd,  $J$  = 7.6, 1.5 Hz, 1H), 6.94 (t,  $J$  = 7.6 Hz, 1H);  $^{13}\text{C}$  NMR (100 MHz,  $\text{CDCl}_3$ )  $\delta$  151.6, 150.7, 140.4, 137.2, 135.8, 132.6, 131.3, 130.5, 130.4, 129.0, 128.6, 128.1, 127.6, 127.3, 127.2, 126.7, 126.7, 125.5; HRMS (ESI)  $[\text{M}+\text{H}]^+$  Calcd for  $\text{C}_{36}\text{H}_{25}\text{N}_2$ : 485.2018, found 485.1978.



**1,3-Bis(7-chloro-4-phenylisoquinolin-2-yl)benzene (7d):**

The product was obtained as a light-reddish solid (226.3 mg, 82% yield), mp: 182–184 °C;  $^1\text{H}$  NMR (400 MHz,  $\text{CDCl}_3$ )  $\delta$  9.23 (s, 2H), 8.01 (d,  $J$  = 1.5 Hz, 2H), 7.61–7.59 (m, 3H), 7.53–7.50 (m, 2H), 7.37–7.30 (m, 6H), 7.14–7.12 (m, 4H), 7.07–7.05 (m, 2H), 6.94 (t,  $J$  = 7.6 Hz, 1H);  $^{13}\text{C}$  NMR (100 MHz,  $\text{CDCl}_3$ )  $\delta$  150.9, 150.5, 140.0, 136.6, 134.2, 132.6, 132.5, 131.3, 131.2, 130.5, 129.1, 128.3, 127.8, 127.5, 127.5, 126.8, 126.1; HRMS (ESI)  $[\text{M}+\text{H}]^+$  Calcd for  $\text{C}_{36}\text{H}_{23}\text{Cl}_2\text{N}_2$ : 553.1238, found 553.1244.



**1,3-Bis(4-(thiophen-2-yl)isoquinolin-3-yl)benzene (7e):**

The product was obtained as a brown solid (193.4 mg, 78% yield), mp: 175–177 °C;  $^1\text{H}$  NMR

(400 MHz, CDCl<sub>3</sub>)  $\delta$  9.32 (s, 2H), 8.01 (d,  $J$  = 7.6 Hz, 2H), 7.88 (d,  $J$  = 8.3 Hz, 2H), 7.79–7.78 (m, 1H), 7.67–7.57 (m, 4H), 7.36–7.35 (m, 2H), 7.31–7.28 (m, 2H), 7.10 (t,  $J$  = 7.6 Hz, 1H), 7.04–7.01 (m, 2H), 6.95–6.94 (m, 2H); <sup>13</sup>C NMR (100 MHz, CDCl<sub>3</sub>)  $\delta$  152.3, 152.1, 140.3, 137.7, 136.7, 131.7, 130.8, 129.8, 128.6, 127.5, 127.1, 127.0, 126.9, 126.8, 125.3, 123.4; HRMS (ESI) [M+H]<sup>+</sup> Calcd for C<sub>32</sub>H<sub>21</sub>N<sub>2</sub>S<sub>2</sub>: 497.1146, found 497.1148.

### General Procedure for the Functionalization of 3-alkynylisoquinoline derivatives (8a–b).



**(8a).** The product was obtained as brown solid (191.7 mg, 90%), mp: 190–192 °C; <sup>1</sup>H NMR (400 MHz, CDCl<sub>3</sub>)  $\delta$  9.08 (s, 1H), 8.46 (d,  $J$  = 13.7 Hz, 1H), 8.05 (d,  $J$  = 2.3 Hz, 1H), 7.56–7.45 (m, 5H), 7.29–7.16 (m, 4H), 7.08 (t,  $J$  = 7.2 Hz, 1H), 6.52 (d,  $J$  = 3.1 Hz, 1H), 6.43 (d,  $J$  = 13.7 Hz, 1H), 2.09 (s, 3H); <sup>13</sup>C NMR (100 MHz, CDCl<sub>3</sub>)  $\delta$  149.6, 145.5, 135.0, 134.9, 133.6, 132.9, 129.6, 128.8, 128.3, 127.8, 127.6, 127.1, 127.0, 126.7, 126.2, 122.6, 121.9, 120.2, 120.1, 118.8, 109.2, 109.1, 105.0, 29.93; HRMS (ESI) [M+H]<sup>+</sup> Calcd for C<sub>26</sub>H<sub>18</sub>BrN<sub>2</sub>: 425.0653, found 427.0646



### **4-Phenyl-3-(m-tolylethynyl)isoquinoline (8b).**

The product was obtained as white solid (170.4 mg, 80%), mp: 156–158 °C; <sup>1</sup>H NMR (400 MHz, CDCl<sub>3</sub>)  $\delta$  9.34 (s, 1H), 8.08 (q,  $J$  = 3.1 Hz, 1H), 7.76–7.59 (m, 8H), 7.24–7.20 (m, 1H), 7.17–7.14 (m, 3H), 2.36 (s, 3H); <sup>13</sup>C NMR (100 MHz, CDCl<sub>3</sub>)  $\delta$ : 151.2, 136.8, 135.4, 135.3, 134.4, 133.9, 131.3, 129.9, 129.7, 128.4, 127.8, 127.6, 127.2, 127.1, 127.0, 126.9, 126.6, 126.5, 124.4, 121.5, 91.8, 88.1, 20.22; HRMS (ESI) [M+H]<sup>+</sup> Calcd for C<sub>24</sub>H<sub>18</sub>N: 320.1439, found 320.1456.

**Control Experiment:** Competition between arylmethylamine **2** vs alkylamine **2aa**



**2-Butyl-3-phenylisoindolin-1-one (9).** The product was obtained as white solid (98.7 mg, 80%), mp: 90–92 °C; <sup>1</sup>H NMR (400 MHz, CDCl<sub>3</sub>) δ 7.89 (q, *J* = 2.8 Hz, 1H), 7.47–7.42 (m, 2H), 7.37–7.33 (m, 3H), 7.18–7.13 (m, 3H), 5.45 (s, 1H), 3.95 (dt, *J* = 15.0 and 7.1 Hz, 1H), 2.89–2.82 (m, 1H), 1.56–1.49 (m, 2H), 1.33–1.25 (m, 2H), 0.90 (t, *J* = 7.6 Hz, 3H); <sup>13</sup>C NMR (100 MHz, CDCl<sub>3</sub>) δ 168.5, 146.2, 137.1, 131.7, 131.6, 129.1, 128.6, 128.2, 127.5, 123.5, 123.0, 64.3, 39.8, 30.3, 20.0, 13.7; HRMS (ESI) [M+H]<sup>+</sup> Calcd for C<sub>18</sub>H<sub>20</sub>NO: 266.1545, found 266.1551.



**2-Benzyl-3-methylisoindolin-1-one (10).** The product was obtained as brown liquid (65%); <sup>1</sup>H NMR (400 MHz, CDCl<sub>3</sub>) δ 7.89 (d, *J* = 7.6 Hz, 1H), 7.53 (td, *J* = 7.4, 1.1 Hz, 1H), 7.46 (t, *J* = 7.3 Hz, 1H), 7.36 (d, *J* = 7.0 Hz, 1H), 7.31–7.25 (m, 5H), 5.34 (d, *J* = 15.3 Hz, 1H), 4.37 (q, *J* = 6.7 Hz, 1H), 4.26 (d, *J* = 15.3 Hz, 1H), 1.42 (d, *J* = 6.7 Hz, 3H); <sup>13</sup>C NMR (100 MHz, CDCl<sub>3</sub>) δ 168.2, 147.1, 137.3, 131.7, 128.8, 128.2, 128.1, 127.6, 123.9, 122.1, 55.1, 43.8, 18.1; HRMS (ESI) [M+H]<sup>+</sup> Calcd for C<sub>16</sub>H<sub>16</sub>NO: 238.1232, found 238.1371.

# **Copies of $^1\text{H}$ , $^{13}\text{C}$ NMR and HRMS**

# <sup>1</sup>H NMR



**(*E*)-N'-(2-hydroxy-5-methylbenzylidene)benzohydrazide (13b)**



<sup>13</sup>C NMR



(*E*)-N'-(2-hydroxy-5-methylbenzylidene)benzohydrazide (13b)



# HRMS



(*E*)-N'-(2-hydroxy-5-methylbenzylidene)benzohydrazide (13b)

## Qualitative Compound Report

|                        |              |               |                     |
|------------------------|--------------|---------------|---------------------|
| Data File              | AP-70.d      | Sample Name   | AP-70               |
| Sample Type            | Sample       | Position      | P1-A1               |
| Instrument Name        | Instrument 1 | User Name     |                     |
| Acq Method             | Damo JK.m    | Acquired Time | 19-12-2018 12:25:27 |
| IRM Calibration Status | Success      | DA Method     | Default.m           |
| Comment                |              |               |                     |

|                |                             |
|----------------|-----------------------------|
| Sample Group   | Info.                       |
| Acquisition SW | 6200 series TOF/6500 series |
| Version        | Q-TOF B.05.01 (B5125.1)     |

### Compound Table

| Compound Label       | RT    | Mass     | Formula       | MFG Formula   | MFG Diff (ppm) | DB Formula    |
|----------------------|-------|----------|---------------|---------------|----------------|---------------|
| Cpd 1: C15 H14 N2 O2 | 0.097 | 254.1057 | C15 H14 N2 O2 | C15 H14 N2 O2 | -0.69          | C15 H14 N2 O2 |

| Compound Label       | m/z     | RT    | Algorithm                 | Mass     |
|----------------------|---------|-------|---------------------------|----------|
| Cpd 1: C15 H14 N2 O2 | 255.113 | 0.097 | Find by Molecular Feature | 254.1057 |

### MFE MS Spectrum



### MFE MS Zoomed Spectrum



### MS Spectrum Peak List

| m/z      | z | Abund      | Formula       | Ion      |
|----------|---|------------|---------------|----------|
| 255.113  | 1 | 30280988   | C15 H14 N2 O2 | (M+H)+   |
| 256.1162 | 1 | 4928714.36 | C15 H14 N2 O2 | (M+H)+   |
| 257.119  | 1 | 558782.89  | C15 H14 N2 O2 | (M+H)+   |
| 277.0949 | 1 | 1893803.63 | C15 H14 N2 O2 | (M+Na)+  |
| 278.0981 | 1 | 324406.05  | C15 H14 N2 O2 | (M+Na)+  |
| 509.2185 | 1 | 1404300.63 | C15 H14 N2 O2 | (2M+H)+  |
| 510.2216 | 1 | 500959.97  | C15 H14 N2 O2 | (2M+H)+  |
| 531.1998 | 1 | 3348224.25 | C15 H14 N2 O2 | (2M+Na)+ |
| 532.203  | 1 | 1175311.3  | C15 H14 N2 O2 | (2M+Na)+ |
| 533.2018 | 1 | 260225.12  | C15 H14 N2 O2 | (2M+Na)+ |

--- End Of Report ---

# <sup>1</sup>H NMR



(E)-N'-(5-(*tert*-butyl)-2-hydroxybenzylidene)benzohydrazide (13c)



<sup>13</sup>C NMR



(E)-N'-(5-(*tert*-butyl)-2-hydroxybenzylidene)benzohydrazide (13c)



# HRMS



(E)-N'-(5-(*tert*-butyl)-2-hydroxybenzylidene)benzohydrazide (13c)

## Qualitative Compound Report

Data File AP-104.d Sample Name AP-104  
Sample Type Sample Position P1-A3  
Instrument Name Instrument 1 User Name  
Acq Method Damo JK.m Acquired Time 17-01-2019 11:50:08  
IRM Calibration Status Success DA Method Default.m  
Comment

Sample Group Info.  
Acquisition SW 6200 series TOF/6500 series  
Version Q-TOF B.05.01 (B5125.1)

### Compound Table

| Compound Label       | RT    | Mass     | Formula       | MFG Formula   | MFG Diff (ppm) | DB Formula    |
|----------------------|-------|----------|---------------|---------------|----------------|---------------|
| Cpd 1: C18 H20 N2 O2 | 0.147 | 296.1524 | C18 H20 N2 O2 | C18 H20 N2 O2 | 0.17           | C18 H20 N2 O2 |

| Compound Label       | m/z      | RT    | Algorithm                 | Mass     |
|----------------------|----------|-------|---------------------------|----------|
| Cpd 1: C18 H20 N2 O2 | 297.1599 | 0.147 | Find by Molecular Feature | 296.1524 |

### MFE MS Spectrum



### MFE MS Zoomed Spectrum



### MS Spectrum Peak List

| m/z      | z | Abund      | Formula       | Ion     |
|----------|---|------------|---------------|---------|
| 297.1599 | 1 | 30843144   | C18 H20 N2 O2 | (M+H)+  |
| 298.1632 | 1 | 6509717.09 | C18 H20 N2 O2 | (M+H)+  |
| 299.1663 | 1 | 776922.81  | C18 H20 N2 O2 | (M+H)+  |
| 300.1688 | 1 | 63542.78   | C18 H20 N2 O2 | (M+H)+  |
| 301.1699 | 1 | 3079.26    | C18 H20 N2 O2 | (M+H)+  |
| 593.3121 | 1 | 3794690.25 | C18 H20 N2 O2 | (2M+H)+ |
| 594.3156 | 1 | 1556590.82 | C18 H20 N2 O2 | (2M+H)+ |
| 595.3182 | 1 | 350999.66  | C18 H20 N2 O2 | (2M+H)+ |
| 596.3207 | 1 | 53491.41   | C18 H20 N2 O2 | (2M+H)+ |
| 597.3192 | 1 | 5752.6     | C18 H20 N2 O2 | (2M+H)+ |

--- End Of Report ---

# <sup>1</sup>H NMR



(*E*)-N'-(2-hydroxy-4-isopropylbenzylidene)benzohydrazide (13d)



<sup>13</sup>C NMR



(*E*)-N'-(2-hydroxy-4-isopropylbenzylidene)benzohydrazide (13d)



# HRMS



**(E)-N'-(2-hydroxy-4-isopropylbenzylidene)benzohydrazide (13d)**

## Qualitative Compound Report

|                        |              |               |                     |
|------------------------|--------------|---------------|---------------------|
| Data File              | AP-62.d      | Sample Name   | AP-62               |
| Sample Type            | Sample       | Position      | P1-D3               |
| Instrument Name        | Instrument 1 | User Name     |                     |
| Acq Method             | Damo JK.m    | Acquired Time | 25-07-2018 13:00:57 |
| IRM Calibration Status | Success      | DA Method     | Default.m           |
| Comment                |              |               |                     |

|                |                             |
|----------------|-----------------------------|
| Sample Group   | Info.                       |
| Acquisition SW | 6200 series TOF/6500 series |
| Version        | Q-TOF B.05.01 (B5125.1)     |

### Compound Table

| Compound Label       | RT    | Mass     | Formula       | MFG Formula   | MFG Diff (ppm) | DB Formula    |
|----------------------|-------|----------|---------------|---------------|----------------|---------------|
| Cpd 3: C17 H18 N2 O2 | 0.107 | 282.1365 | C17 H18 N2 O2 | C17 H18 N2 O2 | 1.18           | C17 H18 N2 O2 |

| Compound Label       | m/z      | RT    | Algorithm                 | Mass     |
|----------------------|----------|-------|---------------------------|----------|
| Cpd 3: C17 H18 N2 O2 | 283.1435 | 0.107 | Find by Molecular Feature | 282.1365 |

### MFE MS Spectrum



### MFE MS Zoomed Spectrum



### MS Spectrum Peak List

| m/z      | z | Abund      | Formula       | Ion      |
|----------|---|------------|---------------|----------|
| 283.1435 | 1 | 24773520   | C17 H18 N2 O2 | (M+H)+   |
| 284.1472 | 1 | 4798993.98 | C17 H18 N2 O2 | (M+H)+   |
| 285.1499 | 1 | 588671.75  | C17 H18 N2 O2 | (M+H)+   |
| 305.1258 | 1 | 991808.06  | C17 H18 N2 O2 | (M+Na)+  |
| 321.0991 | 1 | 233327.14  | C17 H18 N2 O2 | (M+K)+   |
| 565.2803 | 1 | 828694.63  | C17 H18 N2 O2 | (2M+H)+  |
| 566.2832 | 1 | 321523.7   | C17 H18 N2 O2 | (2M+H)+  |
| 587.2616 | 1 | 3034131    | C17 H18 N2 O2 | (2M+Na)+ |
| 588.265  | 1 | 1204745.5  | C17 H18 N2 O2 | (2M+Na)+ |
| 589.2612 | 1 | 316114.31  | C17 H18 N2 O2 | (2M+Na)+ |

--- End Of Report ---

# <sup>1</sup>H NMR



**(*E*)-N'-((4-hydroxy-[1,1'-biphenyl]-3-yl)methylene)benzohydrazide (13f)**



<sup>13</sup>C NMR



(*E*)-N'-((4-hydroxy-[1,1'-biphenyl]-3-yl)methylene)benzohydrazide ((13f))



# HRMS



**(E)-N'-((4-hydroxy-[1,1'-biphenyl]-3-yl)methylene)benzohydrazide ((13f))**



# <sup>1</sup>H NMR



(E)-N'-(5-chloro-2-hydroxybenzylidene)benzohydrazide (13g)



<sup>13</sup>C NMR



(E)-N'-(5-chloro-2-hydroxybenzylidene)benzohydrazide (13g)



# HRMS



(E)-N'-(5-chloro-2-hydroxybenzylidene)benzohydrazide (13g)

## Qualitative Compound Report

AP-133 B

|                        |              |               |                     |
|------------------------|--------------|---------------|---------------------|
| Data File              | AP-133.d     | Sample Name   | AP-133              |
| Sample Type            | Sample       | Position      | P1-A1               |
| Instrument Name        | Instrument 1 | User Name     |                     |
| Acq Method             | Demo JK.m    | Acquired Time | 17-01-2019 14:31:02 |
| IRM Calibration Status | Success      | DA Method     | Default.m           |
| Comment                |              |               |                     |

Sample Group Info.  
Acquisition SW 6200 series TOF/6500 series  
Version Q-TOF B.05.01 (B5125.1)

### Compound Table

| Compound Label          | RT    | Mass     | Formula          | MFG Formula      | MFG Diff (ppm) | DB Formula       |
|-------------------------|-------|----------|------------------|------------------|----------------|------------------|
| Cpd 3: C14 H11 Cl N2 O2 | 0.136 | 274.0511 | C14 H11 Cl N2 O2 | C14 H11 Cl N2 O2 | -0.56          | C14 H11 Cl N2 O2 |

| Compound Label          | m/z     | RT    | Algorithm                 | Mass     |
|-------------------------|---------|-------|---------------------------|----------|
| Cpd 3: C14 H11 Cl N2 O2 | 275.059 | 0.136 | Find by Molecular Feature | 274.0511 |

### MFE MS Spectrum



### MFE MS Zoomed Spectrum



### MS Spectrum Peak List

| m/z      | z | Abund      | Formula          | Ion     |
|----------|---|------------|------------------|---------|
| 275.059  | 1 | 5150606    | C14 H11 Cl N2 O2 | (M+H)+  |
| 276.0621 | 1 | 832566.75  | C14 H11 Cl N2 O2 | (M+H)+  |
| 277.0565 | 1 | 1707900.92 | C14 H11 Cl N2 O2 | (M+H)+  |
| 549.1094 | 1 | 28707      | C14 H11 Cl N2 O2 | (2M+H)+ |
| 550.1124 | 1 | 8898.26    | C14 H11 Cl N2 O2 | (2M+H)+ |
| 551.1068 | 1 | 20208.74   | C14 H11 Cl N2 O2 | (2M+H)+ |
| 552.1097 | 1 | 6399.29    | C14 H11 Cl N2 O2 | (2M+H)+ |
| 553.1051 | 1 | 4726.57    | C14 H11 Cl N2 O2 | (2M+H)+ |
| 554.1095 | 1 | 788.16     | C14 H11 Cl N2 O2 | (2M+H)+ |

--- End Of Report ---

# <sup>1</sup>H NMR



(E)-N'-(5-fluoro-2-hydroxybenzylidene)benzohydrazide (13i)



<sup>13</sup>C NMR



(E)-N'-(5-fluoro-2-hydroxybenzylidene)benzohydrazide (13i)



# HRMS



## (E)-N'-(5-fluoro-2-hydroxybenzylidene)benzohydrazide (13i)

|                        |              |               |                     |
|------------------------|--------------|---------------|---------------------|
| Data File              | PKM-775.d    | Sample Name   | PKM-775             |
| Sample Type            | Sample       | Position      | P1-A5               |
| Instrument Name        | Instrument 1 | User Name     |                     |
| Acq Method             | Damo JK.m    | Acquired Time | 17-01-2019 11:54:26 |
| IRM Calibration Status | Success      | DA Method     | Default.m           |
| Comment                |              |               |                     |

|                |                             |
|----------------|-----------------------------|
| Sample Group   | Info.                       |
| Acquisition SW | 6200 series TOF/6500 series |
| Version        | Q-TOF B.05.01 (B5125.1)     |

### Compound Table

| Compound Label         | RT    | Mass     | Formula         | MFG Formula     | MFG Diff (ppm) | DB Formula      |
|------------------------|-------|----------|-----------------|-----------------|----------------|-----------------|
| Cpd 7: C14 H11 F N2 O2 | 0.095 | 258.0807 | C14 H11 F N2 O2 | C14 H11 F N2 O2 | -1.13          | C14 H11 F N2 O2 |

| Compound Label         | m/z      | RT    | Algorithm                 | Mass     |
|------------------------|----------|-------|---------------------------|----------|
| Cpd 7: C14 H11 F N2 O2 | 259.0881 | 0.095 | Find by Molecular Feature | 258.0807 |

### MFE MS Spectrum



### MFE MS Zoomed Spectrum



### MS Spectrum Peak List

| m/z      | z | Abund     | Formula         | Ion     |
|----------|---|-----------|-----------------|---------|
| 259.0881 | 1 | 6026563.5 | C14 H11 F N2 O2 | (M+H)+  |
| 260.0914 | 1 | 984439.24 | C14 H11 F N2 O2 | (M+H)+  |
| 261.0936 | 1 | 94702.61  | C14 H11 F N2 O2 | (M+H)+  |
| 262.0967 | 1 | 8097.4    | C14 H11 F N2 O2 | (M+H)+  |
| 281.07   | 1 | 441292.41 | C14 H11 F N2 O2 | (M+Na)+ |
| 282.073  | 1 | 69942.86  | C14 H11 F N2 O2 | (M+Na)+ |
| 283.076  | 1 | 6573.05   | C14 H11 F N2 O2 | (M+Na)+ |

--- End Of Report ---

<sup>1</sup>H NMR



(E)-N'-(3,5-dichloro-2-hydroxybenzylidene)benzohydrazide (13k)



<sup>13</sup>C NMR



(E)-N'-(3,5-dichloro-2-hydroxybenzylidene)benzohydrazide (13k)



# HRMS



## (E)-N'-(3,5-dichloro-2-hydroxybenzylidene)benzohydrazide (13k)

### Qualitative Compound Report

|                        |              |               |                     |
|------------------------|--------------|---------------|---------------------|
| Data File              | PKM-222.d    | Sample Name   | PKM-222             |
| Sample Type            | Sample       | Position      | P1-A4               |
| Instrument Name        | Instrument 1 | User Name     |                     |
| Acq Method             | Damo JK.m    | Acquired Time | 17-01-2019 11:52:17 |
| IRM Calibration Status | Success      | DA Method     | Default.m           |
| Comment                |              |               |                     |

|                |                             |
|----------------|-----------------------------|
| Sample Group   | Info.                       |
| Acquisition SW | 6200 series TOF/6500 series |
| Version        | Q-TOF B.05.01 (B5125.1)     |

#### Compound Table

| Compound Label           | RT    | Mass     | Formula           | MFG Formula       | MFG Diff (ppm) | DB Formula        |
|--------------------------|-------|----------|-------------------|-------------------|----------------|-------------------|
| Cpd 4: C14 H10 Cl2 N2 O2 | 0.106 | 308.0123 | C14 H10 Cl2 N2 O2 | C14 H10 Cl2 N2 O2 | -1.31          | C14 H10 Cl2 N2 O2 |

| Compound Label           | m/z      | RT    | Algorithm                 | Mass     |
|--------------------------|----------|-------|---------------------------|----------|
| Cpd 4: C14 H10 Cl2 N2 O2 | 309.0196 | 0.106 | Find by Molecular Feature | 308.0123 |

#### MFE MS Spectrum



#### MFE MS Zoomed Spectrum



#### MS Spectrum Peak List

| m/z      | z | Abund      | Formula           | Ion      |
|----------|---|------------|-------------------|----------|
| 309.0196 | 1 | 1776368.88 | C14 H10 Cl2 N2 O2 | (M+H)+   |
| 310.0225 | 1 | 285983.11  | C14 H10 Cl2 N2 O2 | (M+H)+   |
| 311.017  | 1 | 1156818.78 | C14 H10 Cl2 N2 O2 | (M+H)+   |
| 312.0197 | 1 | 178181.67  | C14 H10 Cl2 N2 O2 | (M+H)+   |
| 313.0143 | 1 | 193687.49  | C14 H10 Cl2 N2 O2 | (M+H)+   |
| 314.0167 | 1 | 27676.62   | C14 H10 Cl2 N2 O2 | (M+H)+   |
| 639.0113 | 1 | 70142.21   | C14 H10 Cl2 N2 O2 | (2M+Na)+ |
| 641.0082 | 1 | 96641.41   | C14 H10 Cl2 N2 O2 | (2M+Na)+ |
| 642.0105 | 1 | 30700.47   | C14 H10 Cl2 N2 O2 | (2M+Na)+ |
| 643.0056 | 1 | 50283.59   | C14 H10 Cl2 N2 O2 | (2M+Na)+ |

--- End Of Report ---

# <sup>1</sup>H NMR



Ethyl (*E*)-3-((2-benzoylhydrazono)methyl)-4-hydroxybenzoate (13l)



<sup>13</sup>C NMR



Ethyl (*E*)-3-((2-benzoylhydrazono)methyl)-4-hydroxybenzoate (13l)



# HRMS



## Ethyl (E)-3-((2-benzoylhydrazono)methyl)-4-hydroxybenzoate (13l)

### Qualitative Compound Report

Data File: PKM-209A.d  
Sample Type: Sample  
Instrument Name: Instrument 1  
Acq Method: Demo JK.m  
IRM Calibration Status: Success  
Comment:  
Sample Name: PKM-209A  
Position: P1-C5  
User Name:  
Acquired Time: 01-08-2018 13:10:17  
DA Method: Default.m

Sample Group: Info.  
Acquisition SW: 6200 series TOF/6500 series  
Version: Q-TOF B.05.01 (B5125.1)

#### Compound Table

| Compound Label       | RT    | Mass     | Formula       | MFG Formula   | MFG Diff (ppm) | DB Formula    |
|----------------------|-------|----------|---------------|---------------|----------------|---------------|
| Cpd 2: C17 H16 N2 O4 | 0.097 | 312.1112 | C17 H16 N2 O4 | C17 H16 N2 O4 | -0.55          | C17 H16 N2 O4 |

| Compound Label       | m/z      | RT    | Algorithm                 | Mass     |
|----------------------|----------|-------|---------------------------|----------|
| Cpd 2: C17 H16 N2 O4 | 313.1188 | 0.097 | Find by Molecular Feature | 312.1112 |

#### MFE MS Spectrum



#### MFE MS Zoomed Spectrum



#### MS Spectrum Peak List

| m/z      | z | Abund      | Formula       | Ion      |
|----------|---|------------|---------------|----------|
| 313.1188 | 1 | 16904234   | C17 H16 N2 O4 | (M+H)+   |
| 314.122  | 1 | 3310756.82 | C17 H16 N2 O4 | (M+H)+   |
| 315.1245 | 1 | 414894.35  | C17 H16 N2 O4 | (M+H)+   |
| 335.1007 | 1 | 411420.09  | C17 H16 N2 O4 | (M+Na)+  |
| 625.2294 | 1 | 4006436.5  | C17 H16 N2 O4 | (2M+H)+  |
| 626.2329 | 1 | 1548122.18 | C17 H16 N2 O4 | (2M+H)+  |
| 627.2351 | 1 | 365409.14  | C17 H16 N2 O4 | (2M+H)+  |
| 647.2113 | 1 | 1382744.5  | C17 H16 N2 O4 | (2M+Na)+ |
| 648.2139 | 1 | 541459.25  | C17 H16 N2 O4 | (2M+Na)+ |
| 649.2129 | 1 | 137534.41  | C17 H16 N2 O4 | (2M+Na)+ |

--- End Of Report ---

# <sup>1</sup>H NMR



(E)-4-fluoro-N'-(2-hydroxybenzylidene)benzohydrazide (13m)



<sup>13</sup>C NMR



(E)-4-fluoro-N'-(2-hydroxybenzylidene)benzohydrazide (13m)



# HRMS



(E)-4-fluoro-N'-(2-hydroxybenzylidene)benzohydrazide (13m)

## Qualitative Compound Report

**Data File** PKM-775.d  
**Sample Type** Sample  
**Instrument Name** Instrument 1  
**Acq Method** Dmo JK.m  
**IRM Calibration Status** Success  
**Comment**  
**Sample Name** PKM-775  
**Position** P1-A5  
**User Name**  
**Acquired Time** 17-01-2019 11:54:26  
**DA Method** Default.m

**Sample Group**  
**Acquisition SW** 6200 series TOF/6500 series  
**Version** Q-TOF B.05.01 (B5125.1)

### Compound Table

| Compound Label         | RT    | Mass     | Formula         | MFG Formula     | MFG Diff (ppm) | DB Formula      |
|------------------------|-------|----------|-----------------|-----------------|----------------|-----------------|
| Cpd 7: C14 H11 F N2 O2 | 0.095 | 258.0807 | C14 H11 F N2 O2 | C14 H11 F N2 O2 | -1.13          | C14 H11 F N2 O2 |

| Compound Label         | m/z      | RT    | Algorithm                 | Mass     |
|------------------------|----------|-------|---------------------------|----------|
| Cpd 7: C14 H11 F N2 O2 | 259.0881 | 0.095 | Find by Molecular Feature | 258.0807 |

### MFE MS Spectrum



### MFE MS Zoomed Spectrum



### MS Spectrum Peak List

| m/z      | z | Abund     | Formula         | Ion     |
|----------|---|-----------|-----------------|---------|
| 259.0881 | 1 | 6026563.5 | C14 H11 F N2 O2 | (M+H)+  |
| 260.0914 | 1 | 984439.24 | C14 H11 F N2 O2 | (M+H)+  |
| 261.0936 | 1 | 94702.61  | C14 H11 F N2 O2 | (M+H)+  |
| 262.0967 | 1 | 8097.4    | C14 H11 F N2 O2 | (M+H)+  |
| 281.07   | 1 | 441292.41 | C14 H11 F N2 O2 | (M+Na)+ |
| 282.073  | 1 | 69942.86  | C14 H11 F N2 O2 | (M+Na)+ |
| 283.076  | 1 | 6573.05   | C14 H11 F N2 O2 | (M+Na)+ |

--- End Of Report ---

# <sup>1</sup>H NMR



(E)-N'-(2-hydroxybenzylidene)isonicotinohydrazide (13o)



<sup>13</sup>C NMR



(E)-N'-(2-hydroxybenzylidene)isonicotinohydrazide (13o)



# HRMS



(E)-N'-(2-hydroxybenzylidene)isonicotinohydrazide (13o)

## Qualitative Compound Report

|                               |              |                      |                     |
|-------------------------------|--------------|----------------------|---------------------|
| <b>Data File</b>              | PKM-210A.d   | <b>Sample Name</b>   | PKM-210A            |
| <b>Sample Type</b>            | Sample       | <b>Position</b>      | P1-C8               |
| <b>Instrument Name</b>        | Instrument 1 | <b>User Name</b>     |                     |
| <b>Acq Method</b>             | Damo JK.m    | <b>Acquired Time</b> | 18-01-2019 13:24:17 |
| <b>IRM Calibration Status</b> | Success      | <b>DA Method</b>     | Default.m           |
| <b>Comment</b>                |              |                      |                     |

|                       |                             |
|-----------------------|-----------------------------|
| <b>Sample Group</b>   | Info.                       |
| <b>Acquisition SW</b> | 6200 series TOF/6500 series |
| <b>Version</b>        | Q-TOF 8.05.01 (B5125.1)     |

### Compound Table

| Compound Label       | RT    | Mass     | Formula       | MFG Formula   | MFG Diff (ppm) | DB Formula    |
|----------------------|-------|----------|---------------|---------------|----------------|---------------|
| Cpd 4: C13 H11 N3 O2 | 0.091 | 241.0861 | C13 H11 N3 O2 | C13 H11 N3 O2 | -3.84          | C13 H11 N3 O2 |

| Compound Label       | m/z      | RT    | Algorithm                 | Mass     |
|----------------------|----------|-------|---------------------------|----------|
| Cpd 4: C13 H11 N3 O2 | 242.0932 | 0.091 | Find by Molecular Feature | 241.0861 |

### MFE MS Spectrum



### MFE MS Zoomed Spectrum



### MS Spectrum Peak List

| m/z      | z | Abund      | Formula       | Ion      |
|----------|---|------------|---------------|----------|
| 242.0932 | 1 | 22113034   | C13 H11 N3 O2 | (M+H)+   |
| 243.0965 | 1 | 3566609.9  | C13 H11 N3 O2 | (M+H)+   |
| 244.0989 | 1 | 351530.53  | C13 H11 N3 O2 | (M+H)+   |
| 264.0753 | 1 | 2541967.75 | C13 H11 N3 O2 | (M+Na)+  |
| 265.0782 | 1 | 384656.53  | C13 H11 N3 O2 | (M+Na)+  |
| 266.0802 | 1 | 38868.73   | C13 H11 N3 O2 | (M+Na)+  |
| 280.0459 | 1 | 33015.27   | C13 H11 N3 O2 | (M+K)+   |
| 505.1569 | 1 | 995925     | C13 H11 N3 O2 | (2M+Na)+ |
| 506.1585 | 1 | 344141.46  | C13 H11 N3 O2 | (2M+Na)+ |
| 507.1532 | 1 | 106115.8   | C13 H11 N3 O2 | (2M+Na)+ |

--- End Of Report ---

<sup>1</sup>H NMR



(E)-4-(*tert*-Butyl)-N'-(2-hydroxybenzylidene)benzohydrazide (13p)



<sup>13</sup>C NMR



(E)-4-(*tert*-Butyl)-N'-(2-hydroxybenzylidene)benzohydrazide (13p)



# HRMS



(E)-4-(tert-Butyl)-N'-(2-hydroxybenzylidene)benzohydrazide (13p)

## Qualitative Compound Report

|                        |              |               |                     |
|------------------------|--------------|---------------|---------------------|
| Data File              | AP-104.d     | Sample Name   | AP-104              |
| Sample Type            | Sample       | Position      | P1-A3               |
| Instrument Name        | Instrument 1 | User Name     |                     |
| Acq Method             | Damo JK.m    | Acquired Time | 17-01-2019 11:50:08 |
| IRM Calibration Status | Success      | DA Method     | Default.m           |
| Comment                |              |               |                     |

|                |                             |
|----------------|-----------------------------|
| Sample Group   | Info.                       |
| Acquisition SW | 6200 series TOF/6500 series |
| Version        | Q-TOF B.05.01 (B5125.1)     |

### Compound Table

| Compound Label       | RT    | Mass     | Formula       | MFG Formula   | MFG Diff (ppm) | DB Formula    |
|----------------------|-------|----------|---------------|---------------|----------------|---------------|
| Cpd 1: C18 H20 N2 O2 | 0.147 | 296.1524 | C18 H20 N2 O2 | C18 H20 N2 O2 | 0.17           | C18 H20 N2 O2 |

| Compound Label       | m/z      | RT    | Algorithm                 | Mass     |
|----------------------|----------|-------|---------------------------|----------|
| Cpd 1: C18 H20 N2 O2 | 297.1599 | 0.147 | Find by Molecular Feature | 296.1524 |

### MFE MS Spectrum



### MFE MS Zoomed Spectrum



### MS Spectrum Peak List

| m/z      | z | Abund      | Formula       | Ion     |
|----------|---|------------|---------------|---------|
| 297.1599 | 1 | 30843144   | C18 H20 N2 O2 | (M+H)+  |
| 298.1632 | 1 | 6509717.09 | C18 H20 N2 O2 | (M+H)+  |
| 299.1663 | 1 | 776922.81  | C18 H20 N2 O2 | (M+H)+  |
| 300.1688 | 1 | 63542.78   | C18 H20 N2 O2 | (M+H)+  |
| 301.1699 | 1 | 3079.26    | C18 H20 N2 O2 | (M+H)+  |
| 593.3121 | 1 | 3794690.25 | C18 H20 N2 O2 | (2M+H)+ |
| 594.3156 | 1 | 1556590.82 | C18 H20 N2 O2 | (2M+H)+ |
| 595.3182 | 1 | 350999.66  | C18 H20 N2 O2 | (2M+H)+ |
| 596.3207 | 1 | 53491.41   | C18 H20 N2 O2 | (2M+H)+ |
| 597.3192 | 1 | 5752.6     | C18 H20 N2 O2 | (2M+H)+ |

--- End Of Report ---

# <sup>1</sup>H NMR



(E)-N'-((2-hydroxynaphthalen-1-yl)methylene)benzohydrazide (13q)



<sup>13</sup>C NMR



(E)-N'-((2-hydroxynaphthalen-1-yl)methylene)benzohydrazide (13q)



# HRMS



(E)-N'-((2-hydroxynaphthalen-1-yl)methylene)benzohydrazide (13q)

## Qualitative Compound Report

|                               |              |                      |                     |
|-------------------------------|--------------|----------------------|---------------------|
| <b>Data File</b>              | PKM-89.d     | <b>Sample Name</b>   | PKM-89              |
| <b>Sample Type</b>            | Sample       | <b>Position</b>      | P1-C7               |
| <b>Instrument Name</b>        | Instrument 1 | <b>User Name</b>     |                     |
| <b>Acq Method</b>             | Damo JK.m    | <b>Acquired Time</b> | 18-01-2019 13:22:06 |
| <b>IRM Calibration Status</b> | Success      | <b>DA Method</b>     | Default.m           |
| <b>Comment</b>                |              |                      |                     |

  

|                       |                             |              |
|-----------------------|-----------------------------|--------------|
| <b>Sample Group</b>   |                             | <b>Info.</b> |
| <b>Acquisition SW</b> | 6200 series TOF/6500 series |              |
| <b>Version</b>        | Q-TOF B.05.01 (B5125.1)     |              |

### Compound Table

| Compound Label       | RT    | Mass     | Formula       | MFG Formula   | MFG Diff (ppm) | DB Formula    |
|----------------------|-------|----------|---------------|---------------|----------------|---------------|
| Cpd 5: C18 H14 N2 O2 | 0.129 | 290.1061 | C18 H14 N2 O2 | C18 H14 N2 O2 | -1.85          | C18 H14 N2 O2 |

| Compound Label       | m/z      | RT    | Algorithm                 | Mass     |
|----------------------|----------|-------|---------------------------|----------|
| Cpd 5: C18 H14 N2 O2 | 291.1134 | 0.129 | Find by Molecular Feature | 290.1061 |

### MFE MS Spectrum



### MFE MS Zoomed Spectrum



### MS Spectrum Peak List

| m/z      | z | Abund      | Formula       | Ion      |
|----------|---|------------|---------------|----------|
| 291.1134 | 1 | 14600527   | C18 H14 N2 O2 | (M+H)+   |
| 292.1166 | 1 | 2721096    | C18 H14 N2 O2 | (M+H)+   |
| 293.1195 | 1 | 303108.09  | C18 H14 N2 O2 | (M+H)+   |
| 294.1221 | 1 | 33393.45   | C18 H14 N2 O2 | (M+H)+   |
| 581.219  | 1 | 1182891.38 | C18 H14 N2 O2 | (2M+H)+  |
| 582.2218 | 1 | 494663.26  | C18 H14 N2 O2 | (2M+H)+  |
| 583.2244 | 1 | 103130.93  | C18 H14 N2 O2 | (2M+H)+  |
| 603.1995 | 1 | 677489.31  | C18 H14 N2 O2 | (2M+Na)+ |
| 604.2019 | 1 | 272206.49  | C18 H14 N2 O2 | (2M+Na)+ |
| 605.1979 | 1 | 74809.93   | C18 H14 N2 O2 | (2M+Na)+ |

--- End Of Report ---

# <sup>1</sup>H NMR



(E)-4-chloro-N'-((2-hydroxynaphthalen-1-yl)methylene)benzohydrazide (13r)



<sup>13</sup>C NMR



(E)-4-chloro-N'-((2-hydroxynaphthalen-1-yl)methylene)benzohydrazide (13r)



# HRMS



## (E)-4-chloro-N'-((2-hydroxynaphthalen-1-yl)methylene)benzohydrazide (13r)

### Qualitative Compound Report

|                        |              |               |                     |
|------------------------|--------------|---------------|---------------------|
| Data File              | RT-ClH.d     | Sample Name   | RT-ClH              |
| Sample Type            | Sample       | Position      | P1-E5               |
| Instrument Name        | Instrument 1 | User Name     |                     |
| Acq Method             | 29.10.2014.m | Acquired Time | 10-02-2017 12:09:53 |
| IRM Calibration Status | Success      | DA Method     | Default.m           |
| Comment                |              |               |                     |

|                |                             |
|----------------|-----------------------------|
| Sample Group   | Info.                       |
| Acquisition SW | 6200 series TOF/6500 series |
| Version        | Q-TOF B.05.01 (B5125)       |

#### Compound Table

| Compound Label           | RT | Mass     | Formula          | MFG Formula      | MFG Diff (ppm) | DB Formula       |
|--------------------------|----|----------|------------------|------------------|----------------|------------------|
| Cpd 24: C18 H13 Cl N2 O2 | 10 | 324.0653 | C18 H13 Cl N2 O2 | C18 H13 Cl N2 O2 | 3.73           | C18 H13 Cl N2 O2 |

| Compound Label           | m/z      | RT | Algorithm                 | Mass     |
|--------------------------|----------|----|---------------------------|----------|
| Cpd 24: C18 H13 Cl N2 O2 | 325.0727 | 10 | Find by Molecular Feature | 324.0653 |

#### MFE MS Spectrum



#### MFE MS Zoomed Spectrum



#### MS Spectrum Peak List

| m/z      | z | Abund    | Formula          | Ion      |
|----------|---|----------|------------------|----------|
| 325.0727 | 1 | 154947.2 | C18 H13 Cl N2 O2 | (M+H)+   |
| 326.0759 | 1 | 31662.25 | C18 H13 Cl N2 O2 | (M+H)+   |
| 327.0702 | 1 | 49856.89 | C18 H13 Cl N2 O2 | (M+H)+   |
| 328.0727 | 1 | 9623.08  | C18 H13 Cl N2 O2 | (M+H)+   |
| 347.0542 | 1 | 11816.68 | C18 H13 Cl N2 O2 | (M+Na)+  |
| 348.0575 | 1 | 2460.9   | C18 H13 Cl N2 O2 | (M+Na)+  |
| 349.0525 | 1 | 4016.13  | C18 H13 Cl N2 O2 | (M+Na)+  |
| 363.0283 | 1 | 4712.27  | C18 H13 Cl N2 O2 | (M+K)+   |
| 365.0252 | 1 | 1930.76  | C18 H13 Cl N2 O2 | (M+K)+   |
| 673.1075 | 1 | 1936.37  |                  | (2M+Na)+ |

--- End Of Report ---

# <sup>1</sup>H NMR



(E)-N'-((2-Hydroxynaphthalen-1-yl)methylene)thiophene-2-carbohydrazide (13s)



<sup>13</sup>C NMR



(E)-N'-((2-Hydroxynaphthalen-1-yl)methylene)thiophene-2-carbohydrazide (13s)



# HRMS



(E)-N'-((2-Hydroxynaphthalen-1-yl)methylene)thiophene-2-carbohydrazide (13s)

## Qualitative Compound Report

**Data File:** PKM-353  
**Sample Type:** PKM-TH.d  
**Instrument Name:** Sample  
**Acq Method:** Instrument 1  
**IRM Calibration Status:** 29.10.2014.m  
**Comment:** Success  
**Sample Name:** PKM-TH  
**Position:** P1-B7  
**User Name:**  
**Acquired Time:** 17-01-2017 13:55:57  
**DA Method:** Default.m

**Sample Group:**  
**Acquisition SW:** 6300 series TQF/5500 series  
**Version:** Q-TQF 8.05.01 (85129)  
**Info:**

### Compound Table

| Compound Label         | RT | Mass     | Formula         | MFG Formula     | MFG Diff (ppm) | DB Formula      |
|------------------------|----|----------|-----------------|-----------------|----------------|-----------------|
| Cod 9: C16 H12 N2 O2 S | 10 | 296.0619 | C16 H12 N2 O2 S | C16 H12 N2 O2 S | 0.03           | C16 H12 N2 O2 S |

| Compound Label         | m/z      | RT | Algorithm                 | Mass     |
|------------------------|----------|----|---------------------------|----------|
| Cod 9: C16 H12 N2 O2 S | 297.0692 | 10 | Find by Molecular Feature | 296.0619 |

### MFE MS Spectrum



### MFE MS Zoomed Spectrum



### MS Spectrum Peak List

| m/z      | z | Abund     | Formula         | Ion     |
|----------|---|-----------|-----------------|---------|
| 297.0692 | 1 | 346294.97 | C16 H12 N2 O2 S | (M+H)+  |
| 298.0721 | 1 | 51734.93  | C16 H12 N2 O2 S | (M+H)+  |
| 299.0693 | 1 | 20220.44  | C16 H12 N2 O2 S | (M+H)+  |
| 300.0706 | 1 | 3306.66   | C16 H12 N2 O2 S | (M+H)+  |
| 319.0906 | 1 | 60161     | C16 H12 N2 O2 S | (M+Na)+ |
| 320.0939 | 1 | 10973.32  | C16 H12 N2 O2 S | (M+Na)+ |
| 321.091  | 1 | 3569.91   | C16 H12 N2 O2 S | (M+Na)+ |
| 335.0247 | 1 | 11135.07  | C16 H12 N2 O2 S | (M+K)+  |
| 336.0278 | 1 | 1908.94   | C16 H12 N2 O2 S | (M+K)+  |
| 631.0848 | 1 | 2957.12   | C16 H12 N2 O2 S | (2M+K)+ |

— End Of Report —

# <sup>1</sup>H NMR



2-benzoyl-5-methylbenzaldehyde (1b)



<sup>13</sup>C NMR



2-benzoyl-5-methylbenzaldehyde (1b)



# HRMS



## 2-benzoyl-5-methylbenzaldehyde (1b)

### Qualitative Compound Report

|                               |              |                      |                     |
|-------------------------------|--------------|----------------------|---------------------|
| <b>Data File</b>              | AP-71.d      | <b>Sample Name</b>   | AP-71               |
| <b>Sample Type</b>            | Sample       | <b>Position</b>      | P1-B9               |
| <b>Instrument Name</b>        | Instrument 1 | <b>User Name</b>     |                     |
| <b>Acq Method</b>             | Damo JK.m    | <b>Acquired Time</b> | 31-12-2018 14:59:46 |
| <b>IRM Calibration Status</b> | Success      | <b>DA Method</b>     | Default.m           |
| <b>Comment</b>                |              |                      |                     |

|                       |                             |              |
|-----------------------|-----------------------------|--------------|
| <b>Sample Group</b>   |                             | <b>Info.</b> |
| <b>Acquisition SW</b> | 6200 series TOF/6500 series |              |
| <b>Version</b>        | Q-TOF B.05.01 (B5125.1)     |              |

#### Compound Table

| Compound Label    | RT   | Mass     | Formula    | MFG Formula | MFG Diff (ppm) | DB Formula |
|-------------------|------|----------|------------|-------------|----------------|------------|
| Cpd 7: C15 H12 O2 | 0.11 | 224.0852 | C15 H12 O2 | C15 H12 O2  | -6.72          | C15 H12 O2 |

| Compound Label    | m/z      | RT   | Algorithm                 | Mass     |
|-------------------|----------|------|---------------------------|----------|
| Cpd 7: C15 H12 O2 | 225.0925 | 0.11 | Find by Molecular Feature | 224.0852 |

#### MFE MS Spectrum



#### MFE MS Zoomed Spectrum



#### MS Spectrum Peak List

| m/z      | z | Abund      | Formula    | Ion    |
|----------|---|------------|------------|--------|
| 225.0925 | 1 | 27908574   | C15 H12 O2 | (M+H)+ |
| 226.096  | 1 | 4636563.19 | C15 H12 O2 | (M+H)+ |
| 227.0996 | 1 | 436573.23  | C15 H12 O2 | (M+H)+ |
| 228.1021 | 1 | 34367.47   | C15 H12 O2 | (M+H)+ |

--- End Of Report ---

# <sup>1</sup>H NMR



2-Benzoyl-5-(tert-butyl)benzaldehyde (1c)



<sup>13</sup>C NMR



**2-Benzoyl-5-(tert-butyl)benzaldehyde (1c)**



# HRMS



**2-Benzoyl-5-(tert-butyl)benzaldehyde (1c)**

|                      |         |                    |           |                        |              |                               |                     |
|----------------------|---------|--------------------|-----------|------------------------|--------------|-------------------------------|---------------------|
| <b>Sample Name</b>   | AP-82   | <b>Position</b>    | P1-B6     | <b>Instrument Name</b> | Instrument 1 | <b>User Name</b>              |                     |
| <b>Inj Vol</b>       | 2       | <b>InjPosition</b> |           | <b>SampleType</b>      | Sample       | <b>IRM Calibration Status</b> | Success             |
| <b>Data Filename</b> | AP-82.d | <b>ACQ Method</b>  | Damo JK.m | <b>Comment</b>         |              | <b>Acquired Time</b>          | 01-01-2019 16:03:14 |



# <sup>1</sup>H NMR



2-Benzoyl-4-isopropylbenzaldehyde (1d)



<sup>13</sup>C NMR



**2-Benzoyl-4-isopropylbenzaldehyde (1d)**



# HRMS



## 2-Benzoyl-4-isopropylbenzaldehyde (1d)

### Qualitative Compound Report

Data File: AP-65.d  
Sample Type: Sample  
Instrument Name: Instrument 1  
Acq Method: Damo JK.m  
IRM Calibration Status: Success  
Comment:

Sample Name: AP-65  
Position: P1-A8  
User Name:  
Acquired Time: 16-08-2018 11:11:17  
DA Method: Default.m

Sample Group: Info.  
Acquisition SW: 6200 series TOF/6500 series  
Version: Q-TOF B.05.01 (B5125.1)

#### Compound Table

#### MFE MS Spectrum



#### MFE MS Zoomed Spectrum



#### MS Spectrum Peak List

| m/z      | z | Abund      | Formula    | Ion      |
|----------|---|------------|------------|----------|
| 253.1226 | 1 | 14864380   | C17 H16 O2 | (M+H)+   |
| 254.1262 | 1 | 2766165.25 | C17 H16 O2 | (M+H)+   |
| 255.129  | 1 | 292442.8   | C17 H16 O2 | (M+H)+   |
| 256.1317 | 1 | 21316.46   | C17 H16 O2 | (M+H)+   |
| 505.2403 | 1 | 15907.11   | C17 H16 O2 | (2M+H)+  |
| 506.2424 | 1 | 4358.7     | C17 H16 O2 | (2M+H)+  |
| 527.2204 | 1 | 801395.81  | C17 H16 O2 | (2M+Na)+ |
| 528.2233 | 1 | 299476.59  | C17 H16 O2 | (2M+Na)+ |
| 529.2262 | 1 | 60919.16   | C17 H16 O2 | (2M+Na)+ |

# <sup>1</sup>H NMR



4-Benzoyl-[1,1'-biphenyl]-3-carbaldehyde (1f)



<sup>13</sup>C NMR



4-Benzoyl-[1,1'-biphenyl]-3-carbaldehyde (1f)



# HRMS



## 4-Benzoyl-[1,1'-biphenyl]-3-carbaldehyde (1f)

### Qualitative Compound Report

|                               |              |                      |                     |
|-------------------------------|--------------|----------------------|---------------------|
| <b>Data File</b>              | AP-100.d     | <b>Sample Name</b>   | AP-100              |
| <b>Sample Type</b>            | Sample       | <b>Position</b>      | P1-B8               |
| <b>Instrument Name</b>        | Instrument 1 | <b>User Name</b>     |                     |
| <b>Acq Method</b>             | Damo JK.m    | <b>Acquired Time</b> | 20-12-2018 14:50:10 |
| <b>IRM Calibration Status</b> | Success      | <b>DA Method</b>     | Default.m           |
| <b>Comment</b>                |              |                      |                     |

|                       |                             |
|-----------------------|-----------------------------|
| <b>Sample Group</b>   | Info.                       |
| <b>Acquisition SW</b> | 6200 series TOF/6500 series |
| <b>Version</b>        | Q-TOF B.05.01 (B5125.1)     |

#### Compound Table

| Compound Label    | RT    | Mass     | Formula    | MFG Formula | MFG Diff (ppm) | DB Formula |
|-------------------|-------|----------|------------|-------------|----------------|------------|
| Cpd 3: C20 H14 O2 | 0.177 | 286.1001 | C20 H14 O2 | C20 H14 O2  | -2.49          | C20 H14 O2 |

| Compound Label    | m/z      | RT    | Algorithm                 | Mass     |
|-------------------|----------|-------|---------------------------|----------|
| Cpd 3: C20 H14 O2 | 287.1073 | 0.177 | Find by Molecular Feature | 286.1001 |

#### MFE MS Spectrum



#### MFE MS Zoomed Spectrum



#### MS Spectrum Peak List

| m/z      | z | Abund      | Formula    | Ion    |
|----------|---|------------|------------|--------|
| 287.1073 | 1 | 23755742   | C20 H14 O2 | (M+H)+ |
| 288.1108 | 1 | 5612974.16 | C20 H14 O2 | (M+H)+ |
| 289.114  | 1 | 649173.19  | C20 H14 O2 | (M+H)+ |
| 290.1168 | 1 | 28653.23   | C20 H14 O2 | (M+H)+ |
| 325.0633 | 1 | 49684.78   | C20 H14 O2 | (M+K)+ |

--- End Of Report ---

**$^1\text{H}$  NMR**



**2-Benzoyl-5-chlorobenzaldehyde (1g)**



<sup>13</sup>C NMR



2-Benzoyl-5-chlorobenzaldehyde (1g)



# HRMS



## 2-Benzoyl-5-chlorobenzaldehyde (1g)

### Qualitative Compound Report

|                               |              |                      |                     |
|-------------------------------|--------------|----------------------|---------------------|
| <b>Data File</b>              | AP-13C.d     | <b>Sample Name</b>   | AP-13C              |
| <b>Sample Type</b>            | Sample       | <b>Position</b>      | P1-A2               |
| <b>Instrument Name</b>        | Instrument 1 | <b>User Name</b>     |                     |
| <b>Acq Method</b>             | Damo JK.m    | <b>Acquired Time</b> | 17-01-2019 11:47:58 |
| <b>IRM Calibration Status</b> | Success      | <b>DA Method</b>     | Default.m           |
| <b>Comment</b>                |              |                      |                     |

|                       |                             |              |
|-----------------------|-----------------------------|--------------|
| <b>Sample Group</b>   |                             | <b>Info.</b> |
| <b>Acquisition SW</b> | 6200 series TOF/6500 series |              |
| <b>Version</b>        | Q-TOF B.05.01 (B5125.1)     |              |

#### Compound Table

| Compound Label      | RT    | Mass     | Formula      | MFG Formula  | MFG Diff (ppm) | DB Formula   |
|---------------------|-------|----------|--------------|--------------|----------------|--------------|
| Cpd 7: C14 H9 Cl O2 | 0.117 | 244.0292 | C14 H9 Cl O2 | C14 H9 Cl O2 | -0.45          | C14 H9 Cl O2 |

| Compound Label      | m/z      | RT    | Algorithm                 | Mass     |
|---------------------|----------|-------|---------------------------|----------|
| Cpd 7: C14 H9 Cl O2 | 245.0363 | 0.117 | Find by Molecular Feature | 244.0292 |

#### MFE MS Spectrum



#### MFE MS Zoomed Spectrum



#### MS Spectrum Peak List

| m/z      | z | Abund     | Formula      | Ion    |
|----------|---|-----------|--------------|--------|
| 245.0363 | 1 | 7741631   | C14 H9 Cl O2 | (M+H)+ |
| 246.0402 | 1 | 1215840.9 | C14 H9 Cl O2 | (M+H)+ |
| 247.0342 | 1 | 2428951.8 | C14 H9 Cl O2 | (M+H)+ |
| 248.0373 | 1 | 375215.34 | C14 H9 Cl O2 | (M+H)+ |
| 249.041  | 1 | 38026.62  | C14 H9 Cl O2 | (M+H)+ |
| 250.0448 | 1 | 2511.22   | C14 H9 Cl O2 | (M+H)+ |

--- End Of Report ---

# <sup>1</sup>H NMR



2-Benzoyl-5-fluorobenzaldehyde (1i)



<sup>13</sup>C NMR



2-Benzoyl-5-fluorobenzaldehyde (1i)



# HRMS



## 2-Benzoyl-5-fluorobenzaldehyde (1i)

### Qualitative Compound Report

|                               |              |                      |                     |
|-------------------------------|--------------|----------------------|---------------------|
| <b>Data File</b>              | AP-85.d      | <b>Sample Name</b>   | AP-85               |
| <b>Sample Type</b>            | Sample       | <b>Position</b>      | P1-C2               |
| <b>Instrument Name</b>        | Instrument 1 | <b>User Name</b>     |                     |
| <b>Acq Method</b>             | Damo JK.m    | <b>Acquired Time</b> | 11-01-2019 12:59:25 |
| <b>IRM Calibration Status</b> | Success      | <b>DA Method</b>     | Default.m           |
| <b>Comment</b>                |              |                      |                     |

|                       |                             |              |
|-----------------------|-----------------------------|--------------|
| <b>Sample Group</b>   |                             | <b>Info.</b> |
| <b>Acquisition SW</b> | 6200 series TOF/6500 series |              |
| <b>Version</b>        | Q-TOF B.05.01 (BS125.1)     |              |

#### Compound Table

| Compound Label | RT    | Mass     | MFG Formula |
|----------------|-------|----------|-------------|
| Cpd 7: 0.103   | 0.103 | 228.0593 | <none>      |

| Compound Label | m/z      | RT    | Algorithm                 | Mass     |
|----------------|----------|-------|---------------------------|----------|
| Cpd 7: 0.103   | 229.0665 | 0.103 | Find by Molecular Feature | 228.0593 |

#### MFE MS Spectrum



#### MFE MS Zoomed Spectrum



#### MS Spectrum Peak List

| m/z      | z | Abund      | Ion     |
|----------|---|------------|---------|
| 229.0665 | 1 | 15835259   | (M+H)+  |
| 230.0701 | 1 | 2423749.74 | (M+H)+  |
| 231.0729 | 1 | 232653.23  | (M+H)+  |
| 232.076  | 1 | 21066.26   | (M+H)+  |
| 251.0491 | 1 | 1395735.5  | (M+Na)+ |

**<sup>1</sup>H NMR**



**2-Benzoyl-3,5-dichlorobenzaldehyde (1k)**



<sup>13</sup>C NMR



2-Benzoyl-3,5-dichlorobenzaldehyde (1k)



# HRMS



## 2-Benzoyl-3,5-dichlorobenzaldehyde (1k)

### Qualitative Compound Report

|                               |              |                      |                     |
|-------------------------------|--------------|----------------------|---------------------|
| <b>Data File</b>              | P-98.d       | <b>Sample Name</b>   | P-98                |
| <b>Sample Type</b>            | Sample       | <b>Position</b>      | P1-C4               |
| <b>Instrument Name</b>        | Instrument 1 | <b>User Name</b>     |                     |
| <b>Acq Method</b>             | Damo JK.m    | <b>Acquired Time</b> | 11-01-2019 13:03:45 |
| <b>IRM Calibration Status</b> | Success      | <b>DA Method</b>     | Default.m           |
| <b>Comment</b>                |              |                      |                     |

|                       |                             |              |
|-----------------------|-----------------------------|--------------|
| <b>Sample Group</b>   |                             | <b>Info.</b> |
| <b>Acquisition SW</b> | 6200 series TOF/6500 series |              |
| <b>Version</b>        | Q-TOF B.05.01 (B5125.1)     |              |

#### Compound Table

| Compound Label | RT    | Mass     | MFG Formula |
|----------------|-------|----------|-------------|
| Cpd 7: 0.113   | 0.113 | 277.9856 | <none>      |

| Compound Label | m/z      | RT    | Algorithm                 | Mass     |
|----------------|----------|-------|---------------------------|----------|
| Cpd 7: 0.113   | 278.9929 | 0.113 | Find by Molecular Feature | 277.9856 |

#### MFE MS Spectrum



#### MFE MS Zoomed Spectrum



#### MS Spectrum Peak List

| m/z      | z | Abund     | Ion    |
|----------|---|-----------|--------|
| 278.9929 | 1 | 304431.03 | (M+H)+ |
| 279.9988 | 1 | 56190.22  | (M+H)+ |
| 280.994  | 1 | 150728.19 | (M+H)+ |
| 281.9981 | 1 | 22795.83  | (M+H)+ |
| 282.993  | 1 | 22449.42  | (M+H)+ |

# <sup>1</sup>H NMR



Ethyl 4-benzoyl-3-formylbenzoate (11)



<sup>13</sup>C NMR



Ethyl 4-benzoyl-3-formylbenzoate (11)



# HRMS



## Ethyl 4-benzoyl-3-formylbenzoate (11)

### Qualitative Compound Report

|                               |              |                      |                     |
|-------------------------------|--------------|----------------------|---------------------|
| <b>Data File</b>              | AP-84.d      | <b>Sample Name</b>   | AP-84               |
| <b>Sample Type</b>            | Sample       | <b>Position</b>      | P1-B7               |
| <b>Instrument Name</b>        | Instrument 1 | <b>User Name</b>     |                     |
| <b>Acq Method</b>             | Damo JK.m    | <b>Acquired Time</b> | 01-01-2019 14:40:37 |
| <b>IRM Calibration Status</b> | Success      | <b>DA Method</b>     | Default.m           |
| <b>Comment</b>                |              |                      |                     |

|                       |                             |              |
|-----------------------|-----------------------------|--------------|
| <b>Sample Group</b>   |                             | <b>Info.</b> |
| <b>Acquisition SW</b> | 6200 series TOF/6500 series |              |
| <b>Version</b>        | Q-TOF B.05.01 (B5125.1)     |              |

#### Compound Table

| Compound Label    | RT    | Mass     | Formula    | MFG Formula | MFG Diff (ppm) | DB Formula |
|-------------------|-------|----------|------------|-------------|----------------|------------|
| Cpd 2: C17 H14 O4 | 0.136 | 282.0907 | C17 H14 O4 | C17 H14 O4  | -5.27          | C17 H14 O4 |

| Compound Label    | m/z      | RT    | Algorithm                 | Mass     |
|-------------------|----------|-------|---------------------------|----------|
| Cpd 2: C17 H14 O4 | 283.0979 | 0.136 | Find by Molecular Feature | 282.0907 |

#### MFE MS Spectrum



#### MFE MS Zoomed Spectrum



#### MS Spectrum Peak List

| m/z      | z | Abund      | Formula    | Ion      |
|----------|---|------------|------------|----------|
| 283.0979 | 1 | 27744998   | C17 H14 O4 | (M+H)+   |
| 284.1015 | 1 | 5236606.81 | C17 H14 O4 | (M+H)+   |
| 285.1043 | 1 | 666019.8   | C17 H14 O4 | (M+H)+   |
| 286.1065 | 1 | 74054.64   | C17 H14 O4 | (M+H)+   |
| 587.1697 | 1 | 458867.94  | C17 H14 O4 | (2M+Na)+ |

--- End Of Report ---

# <sup>1</sup>H NMR



2-(4-Fluorobenzoyl)benzaldehyde (1m)



<sup>13</sup>C NMR



2-(4-Fluorobenzoyl)benzaldehyde (1m)



# HRMS



## 2-(4-Fluorobenzoyl)benzaldehyde (1m)

### Qualitative Compound Report

|                               |              |                      |                     |
|-------------------------------|--------------|----------------------|---------------------|
| <b>Data File</b>              | AP-85.d      | <b>Sample Name</b>   | AP-85               |
| <b>Sample Type</b>            | Sample       | <b>Position</b>      | P1-C2               |
| <b>Instrument Name</b>        | Instrument 1 | <b>User Name</b>     |                     |
| <b>Acq Method</b>             | Damo JK.m    | <b>Acquired Time</b> | 11-01-2019 12:59:25 |
| <b>IRM Calibration Status</b> | Success      | <b>DA Method</b>     | Default.m           |
| <b>Comment</b>                |              |                      |                     |

|                       |                             |              |
|-----------------------|-----------------------------|--------------|
| <b>Sample Group</b>   |                             | <b>Info.</b> |
| <b>Acquisition SW</b> | 6200 series TOF/6500 series |              |
| <b>Version</b>        | Q-TOF B.05.01 (B5125.1)     |              |

#### Compound Table

| Compound Label | RT    | Mass     | MFG Formula |
|----------------|-------|----------|-------------|
| Cpd 7: 0.103   | 0.103 | 228.0593 | <none>      |

| Compound Label | m/z      | RT    | Algorithm                 | Mass     |
|----------------|----------|-------|---------------------------|----------|
| Cpd 7: 0.103   | 229.0665 | 0.103 | Find by Molecular Feature | 228.0593 |

#### MFE MS Spectrum



#### MFE MS Zoomed Spectrum



#### MS Spectrum Peak List

| m/z      | z | Abund      | Ion     |
|----------|---|------------|---------|
| 229.0665 | 1 | 15835259   | (M+H)+  |
| 230.0701 | 1 | 2423749.74 | (M+H)+  |
| 231.0729 | 1 | 232653.23  | (M+H)+  |
| 232.076  | 1 | 21066.26   | (M+H)+  |
| 251.0491 | 1 | 1395735.5  | (M+Na)+ |

**<sup>1</sup>H NMR**



**2-isonicotinoylbenzaldehyde (1o)**



O=C1C(=O)c2ccccc2C1c3ccncc3

Two  $^{13}\text{C}$  NMR spectra of compound **1** are shown. The top spectrum is the positive-ion mode, and the bottom spectrum is the negative-ion mode. The x-axis for the top spectrum ranges from 156.0 to 120.0 ppm, and for the bottom spectrum, it ranges from 200.0 to 0 ppm. The chemical structure of **1** is shown above the spectra.

**Chemical structure of 1:** O=C1C(=O)C(=O)C(=O)C1

**Peak data for the positive-ion mode spectrum (top):**

| Chemical Shift (ppm) |
|----------------------|
| 150.716              |
| 150.514              |
| 142.781              |
| 138.851              |
| 135.288              |
| 133.949              |
| 131.836              |
| 131.204              |
| 128.664              |
| 123.096              |
| 122.119              |

**Peak data for the negative-ion mode spectrum (bottom):**

| Chemical Shift (ppm) |
|----------------------|
| 195.863              |
| 190.928              |
| 150.716              |
| 150.514              |
| 142.781              |
| 138.851              |
| 135.288              |
| 133.949              |
| 131.836              |
| 131.204              |
| 128.664              |
| 123.096              |
| 122.119              |
| 77.948               |
| 77.623               |
| 77.306               |

# HRMS



## 2-isonicotinoylbenzaldehyde (1o)

### Qualitative Compound Report

Data File AP-93.d Sample Name AP-93  
Sample Type Sample Position P1-B2  
Instrument Name Instrument 1 User Name  
Acq Method Demo JK.m Acquired Time 13-08-2018 11:57:15  
IRM Calibration Status Success DA Method Default.m  
Comment

Sample Group Info.  
Acquisition SW 6200 series TOF/6500 series  
Version Q-TOF B.05.01 (B5125.1)

#### Compound Table

| Compound Label     | RT    | Mass     | Formula     | MFG Formula | MFG Diff (ppm) | DB Formula  |
|--------------------|-------|----------|-------------|-------------|----------------|-------------|
| Cpd 8: C13 H9 N O2 | 0.093 | 211.0636 | C13 H9 N O2 | C13 H9 N O2 | -1.18          | C13 H9 N O2 |

| Compound Label     | m/z      | RT    | Algorithm                 | Mass     |
|--------------------|----------|-------|---------------------------|----------|
| Cpd 8: C13 H9 N O2 | 212.0708 | 0.093 | Find by Molecular Feature | 211.0636 |

#### MFE MS Spectrum



#### MFE MS Zoomed Spectrum



#### MS Spectrum Peak List

| m/z      | z | Abund      | Formula     | Ion     |
|----------|---|------------|-------------|---------|
| 212.0708 | 1 | 1684.064   | C13 H9 N O2 | (M+H)+  |
| 213.0742 | 1 | 2380323.54 | C13 H9 N O2 | (M+H)+  |
| 214.0769 | 1 | 230253.31  | C13 H9 N O2 | (M+H)+  |
| 215.0808 | 1 | 15829.83   | C13 H9 N O2 | (M+H)+  |
| 216.0763 | 1 | 3158.73    | C13 H9 N O2 | (M+H)+  |
| 234.0529 | 1 | 38597.43   | C13 H9 N O2 | (M+Na)+ |
| 235.0558 | 1 | 6915.75    | C13 H9 N O2 | (M+Na)+ |
| 423.1345 | 1 | 140393.14  | C13 H9 N O2 | (2M+H)+ |
| 424.1373 | 1 | 44284.23   | C13 H9 N O2 | (2M+H)+ |
| 425.1402 | 1 | 7721.7     | C13 H9 N O2 | (2M+H)+ |

# <sup>1</sup>H NMR



2-(4-(*tert*-Butyl)benzoyl)benzaldehyde (1p)



**<sup>13</sup>C NMR**



**2-(4-(*tert*-Butyl)benzoyl)benzaldehyde (1p)**



# HRMS



2-(4-(*tert*-Butyl)benzoyl)benzaldehyde (1p)

|               |         |             |           |                 |              |                        |                     |
|---------------|---------|-------------|-----------|-----------------|--------------|------------------------|---------------------|
| Sample Name   | AP-82   | Position    | P1-B6     | Instrument Name | Instrument 1 | User Name              |                     |
| Inj Vol       | 2       | InjPosition |           | SampleType      | Sample       | IRM Calibration Status | Success             |
| Data Filename | AP-82.d | ACQ Method  | Damo JK.m | Comment         |              | Acquired Time          | 01-01-2019 16:03:14 |



# <sup>1</sup>H NMR



2-Benzoyl-1-naphthaldehyde (1q)



<sup>13</sup>C NMR



2-Benzoyl-1-naphthaldehyde (1q)



# HRMS



## 2-Benzoyl-1-naphthaldehyde (1q)

### Qualitative Compound Report

Data File PKM-PH.d-356 Sample Name PKM-PH  
Sample Type Sample Position P1-C3  
Instrument Name Instrument 1 User Name  
Acq Method 29.10.2014.m Acquired Time 17-01-2017 13:57:48  
IRM Calibration Status Success DA Method Default.m  
Comment

Sample Group Info.  
Acquisition SW 6200 series TOF/6500 series  
Version Q-TOF B.05.01 (B5125)

#### Compound Table

| Compound Label     | RT | Mass     | Formula    | MFG Formula | MFG Diff (ppm) | DB Formula |
|--------------------|----|----------|------------|-------------|----------------|------------|
| Cpd 14: C18 H12 O2 | 10 | 260.0839 | C18 H12 O2 | C18 H12 O2  | -0.63          | C18 H12 O2 |

| Compound Label     | m/z      | RT | Algorithm                 | Mass     |
|--------------------|----------|----|---------------------------|----------|
| Cpd 14: C18 H12 O2 | 261.0912 | 10 | Find by Molecular Feature | 260.0839 |

#### MFE MS Spectrum



#### MFE MS Zoomed Spectrum



#### MS Spectrum Peak List

| m/z      | z | Abund    | Formula    | Ion       |
|----------|---|----------|------------|-----------|
| 261.0912 | 1 | 69675.77 | C18 H12 O2 | (M+H)+    |
| 262.0943 | 1 | 13628.21 | C18 H12 O2 | (M+H)+    |
| 521.1754 | 1 | 2618.48  | C18 H12 O2 | (2M+H)+   |
| 538.1993 | 1 | 4638.24  | C18 H12 O2 | (2M+NH4)+ |
| 543.1569 | 1 | 35088.11 | C18 H12 O2 | (2M+Na)+  |
| 544.1598 | 1 | 13477.34 | C18 H12 O2 | (2M+Na)+  |
| 545.1697 | 1 | 3190.49  | C18 H12 O2 | (2M+Na)+  |
| 559.1307 | 1 | 20203.03 | C18 H12 O2 | (2M+K)+   |
| 560.1344 | 1 | 7914.45  | C18 H12 O2 | (2M+K)+   |
| 561.1383 | 1 | 3491.19  | C18 H12 O2 | (2M+K)+   |

--- End Of Report ---

# <sup>1</sup>H NMR



2-(4-Chlorobenzoyl)-1-naphthaldehyde (1r)



<sup>13</sup>C NMR



2-(4-Chlorobenzoyl)-1-naphthaldehyde (1r)



# HRMS



2-(4-Chlorobenzoyl)-1-naphthaldehyde (1r)

## Qualitative Compound Report

|                               |              |                      |                     |
|-------------------------------|--------------|----------------------|---------------------|
| <b>Data File</b>              | PKM-373S.d   | <b>Sample Name</b>   | PKM-373S            |
| <b>Sample Type</b>            | Sample       | <b>Position</b>      | P1-C9               |
| <b>Instrument Name</b>        | Instrument 1 | <b>User Name</b>     |                     |
| <b>Acq Method</b>             | Damo JK.m    | <b>Acquired Time</b> | 18-01-2019 13:26:26 |
| <b>IRM Calibration Status</b> | Success      | <b>DA Method</b>     | Default.m           |
| <b>Comment</b>                |              |                      |                     |

|                       |                             |
|-----------------------|-----------------------------|
| <b>Sample Group</b>   | Info.                       |
| <b>Acquisition SW</b> | 6200 series TOF/6500 series |
| <b>Version</b>        | Q-TOF B.05.01 (B5125.1)     |

### Compound Table

| Compound Label       | RT    | Mass     | Formula       | MFG Formula   | MFG Diff (ppm) | DB Formula    |
|----------------------|-------|----------|---------------|---------------|----------------|---------------|
| Cpd 1: C18 H11 Cl O2 | 0.142 | 294.0452 | C18 H11 Cl O2 | C18 H11 Cl O2 | -1.45          | C18 H11 Cl O2 |

| Compound Label       | m/z      | RT    | Algorithm                 | Mass     |
|----------------------|----------|-------|---------------------------|----------|
| Cpd 1: C18 H11 Cl O2 | 295.0523 | 0.142 | Find by Molecular Feature | 294.0452 |

### MFE MS Spectrum



### MFE MS Zoomed Spectrum



### MS Spectrum Peak List

| m/z      | z | Abund      | Formula        | Ion      |
|----------|---|------------|----------------|----------|
| 295.0523 | 1 | 1831079.63 | C18 H11 Cl O2  | (M+H)+   |
| 296.0556 | 1 | 349363.9   | C18 H11 Cl O2  | (M+H)+   |
| 297.0505 | 1 | 595921.6   | C18 H11 Cl O2  | (M+H)+   |
| 298.0538 | 1 | 77830.12   | C18 H11 Cl O2  | (M+H)+   |
| 299.0577 | 1 | 11174.87   | C18 H11 Cl O2  | (M+H)+   |
| 312.0756 | 1 | 40389.39   | C12 H16 Cl2 O4 | (M+NH4)+ |

--- End Of Report ---

<sup>1</sup>H NMR



2-(Thiophene-2-carbonyl)-1-naphthaldehyde (1s)



<sup>13</sup>C NMR



2-(Thiophene-2-carbonyl)-1-naphthaldehyde (1s)



# HRMS



## 2-(Thiophene-2-carbonyl)-1-naphthaldehyde (1s)

### Qualitative Compound Report

Data File: PKM-357.d  
Sample Type: Sample  
Instrument Name: Instrument 1  
Acq Method: 29.10.2014.m  
IRM Calibration Status: Success  
Comment:  
Sample Name: PKM-357  
Position: P1-B8  
User Name:  
Acquired Time: 12-01-2017 13:55:49  
DA Method: Default.m

Sample Group: Info.  
Acquisition SW: 6200 series TOF/6500 series  
Version: Q-TOF B.05.01 (B5125)

#### Compound Table

| Compound Label                                          | RT | Mass     | Formula                                          | MFG Formula                                      | MFG Diff (ppm) | DB Formula                                       |
|---------------------------------------------------------|----|----------|--------------------------------------------------|--------------------------------------------------|----------------|--------------------------------------------------|
| Cpd 6: C <sub>16</sub> H <sub>10</sub> O <sub>2</sub> S | 10 | 266.0401 | C <sub>16</sub> H <sub>10</sub> O <sub>2</sub> S | C <sub>16</sub> H <sub>10</sub> O <sub>2</sub> S | 0.3            | C <sub>16</sub> H <sub>10</sub> O <sub>2</sub> S |

| Compound Label                                          | m/z      | RT | Algorithm                 | Mass     |
|---------------------------------------------------------|----------|----|---------------------------|----------|
| Cpd 6: C <sub>16</sub> H <sub>10</sub> O <sub>2</sub> S | 267.0473 | 10 | Find by Molecular Feature | 266.0401 |

#### MFE MS Spectrum



#### MFE MS Zoomed Spectrum



#### MS Spectrum Peak List

| m/z      | z | Abund     | Formula                                          | Ion      |
|----------|---|-----------|--------------------------------------------------|----------|
| 267.0473 | 1 | 148549.58 | C <sub>16</sub> H <sub>10</sub> O <sub>2</sub> S | (M+H)+   |
| 268.0504 | 1 | 25594.81  | C <sub>16</sub> H <sub>10</sub> O <sub>2</sub> S | (M+H)+   |
| 269.0467 | 1 | 8458.57   | C <sub>16</sub> H <sub>10</sub> O <sub>2</sub> S | (M+H)+   |
| 270.0501 | 1 | 1746.3    | C <sub>16</sub> H <sub>10</sub> O <sub>2</sub> S | (M+H)+   |
| 289.0292 | 1 | 5177.57   | C <sub>16</sub> H <sub>10</sub> O <sub>2</sub> S | (M+Na)+  |
| 290.0333 | 1 | 1194.41   | C <sub>16</sub> H <sub>10</sub> O <sub>2</sub> S | (M+Na)+  |
| 555.0692 | 1 | 3855.08   | C <sub>16</sub> H <sub>10</sub> O <sub>2</sub> S | (2M+Na)+ |
| 556.0712 | 1 | 1540.19   | C <sub>16</sub> H <sub>10</sub> O <sub>2</sub> S | (2M+Na)+ |
| 571.0468 | 1 | 2224.99   | C <sub>16</sub> H <sub>10</sub> O <sub>2</sub> S | (2M+K)+  |
| 572.0505 | 1 | 821.18    | C <sub>16</sub> H <sub>10</sub> O <sub>2</sub> S | (2M+K)+  |

--- End Of Report ---

# <sup>1</sup>H NMR



3,4-Diphenylisoquinoline (3a)



**$^{13}\text{C}$  NMR**



**3,4-Diphenylisoquinoline (3a)**



## HRMS



**3,4-Diphenylisoquinoline (3a)**



# <sup>1</sup>H NMR



7-Methyl-3,4-diphenylisoquinoline (3b)



<sup>13</sup>C NMR



7-Methyl-3,4-diphenylisoquinoline (3b)



# HRMS



## 7-Methyl-3,4-diphenylisoquinoline (3b)

### Qualitative Compound Report

|                               |              |                      |                     |
|-------------------------------|--------------|----------------------|---------------------|
| <b>Data File</b>              | PKM-204A.d   | <b>Sample Name</b>   | PKM-204A            |
| <b>Sample Type</b>            | Sample       | <b>Position</b>      | P1-C5               |
| <b>Instrument Name</b>        | Instrument 1 | <b>User Name</b>     |                     |
| <b>Acq Method</b>             | Damo JK.m    | <b>Acquired Time</b> | 26-07-2018 12:04:01 |
| <b>IRM Calibration Status</b> | Success      | <b>DA Method</b>     | Default.m           |
| <b>Comment</b>                |              |                      |                     |

|                       |                             |
|-----------------------|-----------------------------|
| <b>Sample Group</b>   | Info.                       |
| <b>Acquisition SW</b> | 6200 series TOF/6500 series |
| <b>Version</b>        | Q-TOF B.05.01 (B5125.1)     |

#### Compound Table

| Compound Label   | RT   | Mass     | Formula   | MFG Formula | MFG Diff (ppm) | DB Formula |
|------------------|------|----------|-----------|-------------|----------------|------------|
| Cpd 1: C22 H17 N | 0.11 | 295.1344 | C22 H17 N | C22 H17 N   | 5.73           | C22 H17 N  |

| Compound Label   | m/z      | RT   | Algorithm                 | Mass     |
|------------------|----------|------|---------------------------|----------|
| Cpd 1: C22 H17 N | 296.1417 | 0.11 | Find by Molecular Feature | 295.1344 |

#### MFE MS Spectrum



#### MFE MS Zoomed Spectrum



#### MS Spectrum Peak List

| m/z      | z | Abund      | Formula   | Ion     |
|----------|---|------------|-----------|---------|
| 296.1417 | 1 | 31655918   | C22 H17 N | (M+H)+  |
| 297.145  | 1 | 7653701.34 | C22 H17 N | (M+H)+  |
| 298.1485 | 1 | 931254.24  | C22 H17 N | (M+H)+  |
| 318.1234 | 1 | 29413.43   | C22 H17 N | (M+Na)+ |
| 319.1275 | 1 | 7221.86    | C22 H17 N | (M+Na)+ |

# <sup>1</sup>H NMR



7-(*tert*-Butyl)-3,4-diphenylisoquinoline (3c)



<sup>13</sup>C NMR



**7-(*tert*-Butyl)-3,4-diphenylisoquinoline (3c)**



# HRMS



## 7-(*tert*-Butyl)-3,4-diphenylisoquinoline (3c)

### Qualitative Compound Report

|                               |              |                      |                     |
|-------------------------------|--------------|----------------------|---------------------|
| <b>Data File</b>              | PKM-215A.d   | <b>Sample Name</b>   | PKM-215A            |
| <b>Sample Type</b>            | Sample       | <b>Position</b>      | P1-D2               |
| <b>Instrument Name</b>        | Instrument 1 | <b>User Name</b>     |                     |
| <b>Acq Method</b>             | Demo JK.m    | <b>Acquired Time</b> | 31-07-2018 11:58:42 |
| <b>IRM Calibration Status</b> | Success      | <b>DA Method</b>     | Default.m           |
| <b>Comment</b>                |              |                      |                     |

|                       |                             |              |
|-----------------------|-----------------------------|--------------|
| <b>Sample Group</b>   |                             | <b>Info.</b> |
| <b>Acquisition SW</b> | 6200 series TOF/6500 series |              |
| <b>Version</b>        | Q-TOF B.05.01 (B5125.1)     |              |

#### Compound Table

| Compound Label                           | RT    | Mass     | Formula                           | MFG Formula                       | MFG Diff (ppm) | DB Formula                        |
|------------------------------------------|-------|----------|-----------------------------------|-----------------------------------|----------------|-----------------------------------|
| Cpd 2: C <sub>25</sub> H <sub>23</sub> N | 0.098 | 337.1827 | C <sub>25</sub> H <sub>23</sub> N | C <sub>25</sub> H <sub>23</sub> N | 1.13           | C <sub>25</sub> H <sub>23</sub> N |

| Compound Label                           | m/z      | RT    | Algorithm                 | Mass     |
|------------------------------------------|----------|-------|---------------------------|----------|
| Cpd 2: C <sub>25</sub> H <sub>23</sub> N | 338.1899 | 0.098 | Find by Molecular Feature | 337.1827 |

#### MFE MS Spectrum



#### MFE MS Zoomed Spectrum



#### MS Spectrum Peak List

| m/z      | z | Abund      | Formula                           | Ion                 |
|----------|---|------------|-----------------------------------|---------------------|
| 338.1899 | 1 | 28985654   | C <sub>25</sub> H <sub>23</sub> N | (M+H) <sup>+</sup>  |
| 339.1933 | 1 | 7762546.47 | C <sub>25</sub> H <sub>23</sub> N | (M+H) <sup>+</sup>  |
| 340.1967 | 1 | 1079669.41 | C <sub>25</sub> H <sub>23</sub> N | (M+H) <sup>+</sup>  |
| 341.1998 | 1 | 79430.95   | C <sub>25</sub> H <sub>23</sub> N | (M+H) <sup>+</sup>  |
| 342.2035 | 1 | 1177.15    | C <sub>25</sub> H <sub>23</sub> N | (M+H) <sup>+</sup>  |
| 360.172  | 1 | 22604.97   | C <sub>25</sub> H <sub>23</sub> N | (M+Na) <sup>+</sup> |
| 361.1758 | 1 | 6742.66    | C <sub>25</sub> H <sub>23</sub> N | (M+Na) <sup>+</sup> |

— End Of Report —

# <sup>1</sup>H NMR



6-Isopropyl-3,4-diphenylisoquinoline (3d)



<sup>13</sup>C NMR



6-Isopropyl-3,4-diphenylisoquinoline (3d)



# HRMS



## 6-Isopropyl-3,4-diphenylisoquinoline (3d)

### Qualitative Compound Report

|                               |              |                      |                     |
|-------------------------------|--------------|----------------------|---------------------|
| <b>Data File</b>              | PKM-213A.d   | <b>Sample Name</b>   | PKM-213A            |
| <b>Sample Type</b>            | Sample       | <b>Position</b>      | P1-C6               |
| <b>Instrument Name</b>        | Instrument 1 | <b>User Name</b>     |                     |
| <b>Acq Method</b>             | Damo JK.m    | <b>Acquired Time</b> | 26-07-2018 12:05:43 |
| <b>IRM Calibration Status</b> | Success      | <b>DA Method</b>     | Default.m           |
| <b>Comment</b>                |              |                      |                     |

|                       |                             |              |
|-----------------------|-----------------------------|--------------|
| <b>Sample Group</b>   |                             | <b>Info.</b> |
| <b>Acquisition SW</b> | 6200 series TOF/6500 series |              |
| <b>Version</b>        | Q-TOF B.05.01 (B5125.1)     |              |

#### Compound Table

| Compound Label   | RT    | Mass     | Formula   | MFG Formula | MFG Diff (ppm) | DB Formula |
|------------------|-------|----------|-----------|-------------|----------------|------------|
| Cpd 1: C24 H21 N | 0.113 | 323.1658 | C24 H21 N | C24 H21 N   | 5.08           | C24 H21 N  |

| Compound Label   | m/z     | RT    | Algorithm                 | Mass     |
|------------------|---------|-------|---------------------------|----------|
| Cpd 1: C24 H21 N | 324.173 | 0.113 | Find by Molecular Feature | 323.1658 |

#### MFE MS Spectrum



#### MFE MS Zoomed Spectrum



#### MS Spectrum Peak List

| m/z      | z | Abund      | Formula   | Ion     |
|----------|---|------------|-----------|---------|
| 324.173  | 1 | 31178978   | C24 H21 N | (M+H)+  |
| 325.1764 | 1 | 8249072.89 | C24 H21 N | (M+H)+  |
| 326.1797 | 1 | 1101283.46 | C24 H21 N | (M+H)+  |
| 327.1831 | 1 | 88642.41   | C24 H21 N | (M+H)+  |
| 328.1868 | 1 | 8003.66    | C24 H21 N | (M+H)+  |
| 346.1547 | 1 | 24401.85   | C24 H21 N | (M+Na)+ |
| 347.1587 | 1 | 7478.63    | C24 H21 N | (M+Na)+ |

--- End Of Report ---

<sup>1</sup>H NMR



5-Methoxy-3,4-diphenylisoquinoline ( 3e)



<sup>13</sup>C NMR



5-Methoxy-3,4-diphenylisoquinoline ( 3e)



# HRMS



## 5-Methoxy-3,4-diphenylisoquinoline ( 3e)

### Qualitative Compound Report

Data File: PKM-768.d  
Sample Type: Sample  
Instrument Name: Instrument 1  
Acq Method: Demo JK.m  
IRM Calibration Status: Success  
Comment:

Sample Name: PKM-768  
Position: P1-D2  
User Name:  
Acquired Time: 24-09-2018 17:34:36  
DA Method: Default.m

Sample Group: Info.  
Acquisition SW: 6200 series TOF/6500 series  
Version: Q-TOF B.05.01 (B5125.1)

#### Compound Table

| Compound Label     | RT    | Mass    | Formula     | MFG Formula | MFG Diff (ppm) | DB Formula  |
|--------------------|-------|---------|-------------|-------------|----------------|-------------|
| Cpd 2: C22 H17 N O | 0.115 | 311.131 | C22 H17 N O | C22 H17 N O | -0.02          | C22 H17 N O |

| Compound Label     | m/z      | RT    | Algorithm                 | Mass    |
|--------------------|----------|-------|---------------------------|---------|
| Cpd 2: C22 H17 N O | 312.1383 | 0.115 | Find by Molecular Feature | 311.131 |

#### MFE MS Spectrum



#### MFE MS Zoomed Spectrum



#### MS Spectrum Peak List

| m/z      | z | Abund      | Formula     | Ion    |
|----------|---|------------|-------------|--------|
| 312.1383 | 1 | 31018342   | C22 H17 N O | (M+H)+ |
| 313.1416 | 1 | 7200313.65 | C22 H17 N O | (M+H)+ |
| 314.1449 | 1 | 937504.53  | C22 H17 N O | (M+H)+ |
| 315.1481 | 1 | 79090.12   | C22 H17 N O | (M+H)+ |
| 316.1532 | 1 | 1472.38    | C22 H17 N O | (M+H)+ |

--- End Of Report ---

# <sup>1</sup>H NMR



3,4,7-Triphenylisoquinoline (3f)



# <sup>13</sup>C NMR



3,4,7-Triphenylisoquinoline (3f)



# HRMS



## 3,4,7-Triphenylisoquinoline (3f)

Data File: PKM-227A.d  
Sample Type: Sample  
Instrument Name: Instrument 1  
Acq Method: Demo JK.m  
IRM Calibration Status: Success  
Comment:  
Sample Group: Info.  
Acquisition SW: 6200 series TOF/6500 series  
Version: Q-TOF B.05.01 (B5125.1)  
Sample Name: PKM-227A  
Position: P1-A2  
User Name:  
Acquired Time: 24-08-2018 11:35:24  
DA Method: Default.m

### Compound Table

| Compound Label   | RT    | Mass     | Formula   | MFG Formula | MFG Diff (ppm) | DB Formula |
|------------------|-------|----------|-----------|-------------|----------------|------------|
| Cpd 4: C27 H19 N | 0.128 | 357.1516 | C27 H19 N | C27 H19 N   | 0.42           | C27 H19 N  |

| Compound Label   | m/z      | RT    | Algorithm                 | Mass     |
|------------------|----------|-------|---------------------------|----------|
| Cpd 4: C27 H19 N | 358.1596 | 0.128 | Find by Molecular Feature | 357.1516 |

### M/E MS Spectrum



### M/E MS Zoomed Spectrum



### MS Spectrum Peak List

| m/z      | z | Abund      | Formula   | Ion     |
|----------|---|------------|-----------|---------|
| 358.1596 | 1 | 9066505    | C27 H19 N | (M+H)+  |
| 359.163  | 1 | 2699129.66 | C27 H19 N | (M+H)+  |
| 360.1663 | 1 | 380388.22  | C27 H19 N | (M+H)+  |
| 361.1694 | 1 | 37003.73   | C27 H19 N | (M+H)+  |
| 362.173  | 1 | 2815.67    | C27 H19 N | (M+H)+  |
| 380.1416 | 1 | 15592.63   | C27 H19 N | (M+Na)+ |
| 381.1442 | 1 | 5688.63    | C27 H19 N | (M+Na)+ |
| 715.3106 | 1 | 65857.8    | C27 H19 N | (2M+H)+ |
| 716.3139 | 1 | 39270.55   | C27 H19 N | (2M+H)+ |
| 717.3172 | 1 | 11357.17   | C27 H19 N | (2M+H)+ |

— End Of Report —

# <sup>1</sup>H NMR



7-Chloro-3,4-diphenylisoquinoline (3g)



# <sup>13</sup>C NMR



7-Chloro-3,4-diphenylisoquinoline (3g)



# HRMS



7-Chloro-3,4-diphenylisoquinoline (3g)

## Qualitative Compound Report

|                               |              |                      |                     |
|-------------------------------|--------------|----------------------|---------------------|
| <b>Data File</b>              | AB 596.d     | <b>Sample Name</b>   | AB 596              |
| <b>Sample Type</b>            | Sample       | <b>Position</b>      | P2-E1               |
| <b>Instrument Name</b>        | Instrument 1 | <b>User Name</b>     | asmily              |
| <b>Acq Method</b>             | 29.10.2014.m | <b>Acquired Time</b> | 13-08-2015 13:47:51 |
| <b>IRM Calibration Status</b> |              | <b>DA Method</b>     | Default.m           |
| <b>Comment</b>                |              |                      |                     |

|                       |                             |              |
|-----------------------|-----------------------------|--------------|
| <b>Sample Group</b>   |                             | <b>Info.</b> |
| <b>Acquisition SW</b> | 6200 series TOF/6500 series |              |
| <b>Version</b>        | Q-TOF B.05.01 (B5125)       |              |

### Compound Table

| Compound Label      | RT | Mass     | Formula      | MFG Formula  | MFG Diff (ppm) | DB Formula   |
|---------------------|----|----------|--------------|--------------|----------------|--------------|
| Cpd 1: C21 H14 Cl N | 11 | 315.0823 | C21 H14 Cl N | C21 H14 Cl N | -2.49          | C21 H14 Cl N |

| Compound Label      | m/z      | RT | Algorithm                 | Mass     |
|---------------------|----------|----|---------------------------|----------|
| Cpd 1: C21 H14 Cl N | 316.0894 | 11 | Find by Molecular Feature | 315.0823 |

### MFE MS Spectrum



### MFE MS Zoomed Spectrum



### MS Spectrum Peak List

| m/z      | z | Abund      | Formula      | Ion    |
|----------|---|------------|--------------|--------|
| 316.0894 | 1 | 5092500.5  | C21 H14 Cl N | (M+H)+ |
| 317.0931 | 1 | 1200506.61 | C21 H14 Cl N | (M+H)+ |
| 318.0876 | 1 | 1757374.32 | C21 H14 Cl N | (M+H)+ |
| 319.0902 | 1 | 375473.16  | C21 H14 Cl N | (M+H)+ |
| 320.0932 | 1 | 39526.88   | C21 H14 Cl N | (M+H)+ |
| 321.0972 | 1 | 3045.96    | C21 H14 Cl N | (M+H)+ |

--- End Of Report ---

# <sup>1</sup>H NMR



7-Bromo-3,4-diphenylisoquinoline (3h)



<sup>13</sup>C NMR



7-Bromo-3,4-diphenylisoquinoline (3h)



# HRMS



**7-Bromo-3,4-diphenylisoquinoline (3h)**



# <sup>1</sup>H NMR



7-Fluoro-3,4-diphenylisoquinoline (3i)



<sup>13</sup>C NMR



7-Fluoro-3,4-diphenylisoquinoline (3i)



# HRMS



## 7-Fluoro-3,4-diphenylisoquinoline (3i)

### Qualitative Compound Report

Data File: PKM-218A.d  
Sample Type: Sample  
Instrument Name: Instrument 1  
Acq Method: Dermo JK.m  
IRM Calibration Status: Success  
Comment:  
Sample Name: PKM-218A  
Position: P1-D3  
User Name:  
Acquired Time: 31-07-2018 12:00:24  
DA Method: Default.m

Sample Group: Info.  
Acquisition SW: 6200 series TOF/6500 series  
Version: Q-TOF B.05.01 (B5125.1)

#### Compound Table

| Compound Label     | RT    | Mass     | Formula     | MFG Formula | MFG Diff (ppm) | DB Formula  |
|--------------------|-------|----------|-------------|-------------|----------------|-------------|
| Cpd 1: C21 H14 F N | 0.094 | 299.1107 | C21 H14 F N | C21 H14 F N | 1.23           | C21 H14 F N |

| Compound Label     | m/z      | RT    | Algorithm                 | Mass     |
|--------------------|----------|-------|---------------------------|----------|
| Cpd 1: C21 H14 F N | 300.1179 | 0.094 | Find by Molecular Feature | 299.1107 |

#### MFE MS Spectrum



#### MFE MS Zoomed Spectrum



#### MS Spectrum Peak List

| m/z      | z | Abund      | Formula     | Ion     |
|----------|---|------------|-------------|---------|
| 300.1179 | 1 | 13950221   | C21 H14 F N | (M+H)+  |
| 301.1213 | 1 | 3222644.42 | C21 H14 F N | (M+H)+  |
| 302.1245 | 1 | 340158.39  | C21 H14 F N | (M+H)+  |
| 303.1278 | 1 | 24453.58   | C21 H14 F N | (M+H)+  |
| 304.1384 | 1 | 1213.56    | C21 H14 F N | (M+H)+  |
| 322.0996 | 1 | 9519.64    | C21 H14 F N | (M+Na)+ |
| 323.1022 | 1 | 2605.4     | C21 H14 F N | (M+Na)+ |
| 338.0735 | 1 | 1597.88    | C21 H14 F N | (M+K)+  |
| 599.2284 | 1 | 5123.37    | C21 H14 F N | (2M+H)+ |
| 600.2349 | 1 | 2693.42    | C21 H14 F N | (2M+H)+ |

— End Of Report —

<sup>1</sup>H NMR



7-Iodo-3,4-diphenylisoquinoline (3j)



<sup>13</sup>C NMR



7-Iodo-3,4-diphenylisoquinoline (3j)



## HRMS



## 7-Iodo-3,4-diphenylisoquinoline (3j)

## Qualitative Compound Report

|                        |              |               |                     |
|------------------------|--------------|---------------|---------------------|
| Data File              | PKM-221A.d   | Sample Name   | PKM-221A            |
| Sample Type            | Sample       | Position      | P1-A3               |
| Instrument Name        | Instrument 1 | User Name     |                     |
| Acq Method             | Damo JK.m    | Acquired Time | 24-08-2018 13:18:34 |
| IRM Calibration Status | Success      | DA Method     | Default.m           |
| Comment                |              |               |                     |

|                |                             |       |
|----------------|-----------------------------|-------|
| Sample Group   |                             | Info. |
| Acquisition SW | 6200 series TOF/6500 series |       |
| Version        | Q-TOF B.05.01 (B5125.1)     |       |

## Compound Table

| Compound Label     | RT    | Mass     | Formula     | MFG Formula | MFG Diff (ppm) | DB Formula  |
|--------------------|-------|----------|-------------|-------------|----------------|-------------|
| Cpd 1: C21 H14 I N | 0.148 | 407.0184 | C21 H14 I N | C21 H14 I N | -3.16          | C21 H14 I N |

| Compound Label     | m/z      | RT    | Algorithm                 | Mass     |
|--------------------|----------|-------|---------------------------|----------|
| Cpd 1: C21 H14 I N | 408.0256 | 0.148 | Find by Molecular Feature | 407.0184 |

## MFE MS Spectrum



## MFE MS Zoomed Spectrum



## MS Spectrum Peak List

| m/z      | z | Abund      | Formula     | Ion    |
|----------|---|------------|-------------|--------|
| 408.0256 | 1 | 5415848.5  | C21 H14 I N | (M+H)+ |
| 409.0292 | 1 | 1260102.04 | C21 H14 I N | (M+H)+ |
| 410.032  | 1 | 141179.27  | C21 H14 I N | (M+H)+ |
| 411.0357 | 1 | 9069.11    | C21 H14 I N | (M+H)+ |
| 412.0384 | 1 | 505.3      | C21 H14 I N | (M+H)+ |

— End Of Report —

# <sup>1</sup>H NMR



5,7-Dichloro-3,4-diphenylisoquinoline (3k)



<sup>13</sup>C NMR



5,7-Dichloro-3,4-diphenylisoquinoline (3k)



# HRMS



**5,7-Dichloro-3,4-diphenylisoquinoline (3k)**



# <sup>1</sup>H NMR



Ethyl 3,4-diphenylisoquinoline-7-carboxylate (3l)



<sup>13</sup>C NMR



Ethyl 3,4-diphenylisoquinoline-7-carboxylate (3l)



# HRMS



**Ethyl 3,4-diphenylisoquinoline-7-carboxylate (3l)**



# <sup>1</sup>H NMR



3,4-Bis(4-fluorophenyl)isoquinoline ( 3m)



# <sup>13</sup>C NMR



3,4-Bis(4-fluorophenyl)isoquinoline ( 3m)



# HRMS



## 3,4-Bis(4-fluorophenyl)isoquinoline ( 3m)

### Qualitative Compound Report

Data File: PKM-SV-97.d  
Sample Type: Sample  
Instrument Name: Instrument 1  
Acq Method: Demo JK.m  
IRM Calibration Status: Success  
Comment:   
Sample Name: PKM-SV-97  
Position: P1-D4  
User Name:   
Acquired Time: 24-09-2018 15:43:37  
DA Method: Default.m

Sample Group: Info.  
Acquisition SW: 6200 series 1.01 / 6500 series  
Version: Q-TOF B.05.01 (B5125.1)

#### Compound Table

| Compound Label                                          | RT    | Mass     | Formula                                          | MFG Formula                                      | MFG Diff (ppm) | DB Formula                                       |
|---------------------------------------------------------|-------|----------|--------------------------------------------------|--------------------------------------------------|----------------|--------------------------------------------------|
| Cpd 1: C <sub>21</sub> H <sub>13</sub> F <sub>2</sub> N | 0.098 | 317.1024 | C <sub>21</sub> H <sub>13</sub> F <sub>2</sub> N | C <sub>21</sub> H <sub>13</sub> F <sub>2</sub> N | -2.58          | C <sub>21</sub> H <sub>13</sub> F <sub>2</sub> N |

| Compound Label                                          | m/z      | RT    | Algorithm                 | Mass     |
|---------------------------------------------------------|----------|-------|---------------------------|----------|
| Cpd 1: C <sub>21</sub> H <sub>13</sub> F <sub>2</sub> N | 318.1097 | 0.098 | Find by Molecular Feature | 317.1024 |

#### MFE MS Spectrum



#### MFE MS Zoomed Spectrum



#### MS Spectrum Peak List

| m/z      | z | Abund      | Formula                                          | Ion      |
|----------|---|------------|--------------------------------------------------|----------|
| 318.1097 | 1 | 31312122   | C <sub>21</sub> H <sub>13</sub> F <sub>2</sub> N | (M+H)+   |
| 319.1132 | 1 | 6783003.01 | C <sub>21</sub> H <sub>13</sub> F <sub>2</sub> N | (M+H)+   |
| 320.1163 | 1 | 767361.16  | C <sub>21</sub> H <sub>13</sub> F <sub>2</sub> N | (M+H)+   |
| 321.1198 | 1 | 53927.4    | C <sub>21</sub> H <sub>13</sub> F <sub>2</sub> N | (M+H)+   |
| 322.1281 | 1 | 9572.68    | C <sub>21</sub> H <sub>13</sub> F <sub>2</sub> N | (M+H)+   |
| 340.0915 | 1 | 25724.35   | C <sub>21</sub> H <sub>13</sub> F <sub>2</sub> N | (M+Na)+  |
| 341.0961 | 1 | 6793.12    | C <sub>21</sub> H <sub>13</sub> F <sub>2</sub> N | (M+Na)+  |
| 657.1933 | 1 | 9987.42    | C <sub>21</sub> H <sub>13</sub> F <sub>2</sub> N | (2M+Na)+ |
| 658.1974 | 1 | 4814.14    | C <sub>21</sub> H <sub>13</sub> F <sub>2</sub> N | (2M+Na)+ |

End of Report

# <sup>1</sup>H NMR



3,4-Di(thiophen-2-yl)isoquinoline (3n)



<sup>13</sup>C NMR



**3,4-Di(thiophen-2-yl)isoquinoline (3n)**



# HRMS



**3,4-Di(thiophen-2-yl)isoquinoline (3n)**



# <sup>1</sup>H NMR



3,4-Di(pyridin-4-yl)isoquinoline (3o)



<sup>13</sup>C NMR



3,4-Di(pyridin-4-yl)isoquinoline (3o)



# HRMS



## 3,4-Di(pyridin-4-yl)isoquinoline (3o)

### Qualitative Compound Report

Data File: PKM-220A.d  
Sample Type: Sample  
Instrument Name: Instrument 1  
Acq Method: Demo JK.m  
IRM Calibration Status: Success  
Comment:  
Sample Group: Info.  
Acquisition SW: 6700 series TOF/6500 series  
Version: Q-TOF B.05.01 (B5175.1)

Sample Name: PKM-220A  
Position: P1-A4  
User Name:  
Acquired Time: 24-08-2018 11:38:48  
DA Method: Default.m

#### Compound Table

| Compound Label    | RT    | Mass     | Formula    | MFG Formula | MFG Diff (ppm) | DB Formula |
|-------------------|-------|----------|------------|-------------|----------------|------------|
| Cpd 3: C19 H13 N3 | 0.095 | 283.1113 | C19 H13 N3 | C19 H13 N3  | -1.14          | C19 H13 N3 |

| Compound Label    | m/z      | RT    | Algorithm                 | Mass     |
|-------------------|----------|-------|---------------------------|----------|
| Cpd 3: C19 H13 N3 | 284.1186 | 0.095 | Find by Molecular Feature | 283.1113 |

#### MFE MS Spectrum



#### MFE MS Zoomed Spectrum



#### MS Spectrum Peak List

| m/z      | z | Abund      | Formula    | Ion      |
|----------|---|------------|------------|----------|
| 142.5629 | 2 | 3618292    | C19 H13 N3 | (M+2H)+2 |
| 143.0645 | 2 | 805817.42  | C19 H13 N3 | (M+2H)+2 |
| 143.5659 | 2 | 86977.48   | C19 H13 N3 | (M+2H)+2 |
| 284.1186 | 1 | 29/34028   | C19 H13 N3 | (M+H)+   |
| 285.4218 | 1 | 641/649.09 | C19 H13 N3 | (M+H)+   |
| 286.4252 | 1 | 632571.39  | C19 H13 N3 | (M+H)+   |
| 287.1279 | 1 | 46335.14   | C19 H13 N3 | (M+H)+   |
| 306.1007 | 1 | 508859.66  | C19 H13 N3 | (M+Na)+  |
| 307.1037 | 1 | 104311.18  | C19 H13 N3 | (M+Na)+  |
| 308.1065 | 1 | 11190.06   | C19 H13 N3 | (M+Na)+  |

— End of Report —

# <sup>1</sup>H NMR



**3-(4-Methoxyphenyl)-4-phenylisoquinoline (4a)**



<sup>13</sup>C NMR



3-(4-Methoxyphenyl)-4-phenylisoquinoline (4a)



# HRMS



## 3-(4-Methoxyphenyl)-4-phenylisoquinoline (4a)

### Qualitative Compound Report

Data File: PKM-768.d  
Sample Type: Sample  
Instrument Name: Instrument 1  
Acq Method: Demo JK.m  
IRM Calibration Status: Success  
Comment:   
Sample Name: PKM-768  
Position: P1-D2  
User Name:   
Acquired Time: 24-09-2018 17:34:36  
DA Method: Default.m

Sample Group:   
Acquisition SW: 6200 series TOF/6500 series  
Version: Q-TOF B.05.01 (B5125.1)  
Info:

#### Compound Table

| Compound Label     | RT    | Mass    | Formula     | MFG Formula | MFG Diff (ppm) | DB Formula  |
|--------------------|-------|---------|-------------|-------------|----------------|-------------|
| Cpd 2: C22 H17 N O | 0.115 | 311.131 | C22 H17 N O | C22 H17 N O | -0.02          | C22 H17 N O |

| Compound Label     | m/z      | RT    | Algorithm                 | Mass    |
|--------------------|----------|-------|---------------------------|---------|
| Cpd 2: C22 H17 N O | 312.1383 | 0.115 | Find by Molecular Feature | 311.131 |

#### MFE MS Spectrum



#### MFE MS Zoomed Spectrum



#### MS Spectrum Peak List

| m/z      | z | Abund      | Formula     | Ion    |
|----------|---|------------|-------------|--------|
| 312.1383 | 1 | 31018342   | C22 H17 N O | (M+H)+ |
| 313.1416 | 1 | 7200313.65 | C22 H17 N O | (M+H)+ |
| 314.1449 | 1 | 937504.53  | C22 H17 N O | (M+H)+ |
| 315.1481 | 1 | 79090.12   | C22 H17 N O | (M+H)+ |
| 316.1532 | 1 | 1472.38    | C22 H17 N O | (M+H)+ |

--- End Of Report ---

# <sup>1</sup>H NMR



4-(4-Phenylisoquinolin-3-yl)aniline (4b)



<sup>13</sup>C NMR



4-(4-Phenylisoquinolin-3-yl)aniline (4b)



# HRMS



## 4-(4-Phenylisoquinolin-3-yl)aniline (4b)

### Qualitative Compound Report

|                        |              |               |                     |
|------------------------|--------------|---------------|---------------------|
| Data File              | PKM-312.d    | Sample Name   | PKM-312             |
| Sample Type            | Sample       | Position      | P1-D1               |
| Instrument Name        | Instrument 1 | User Name     |                     |
| Acq Method             | Damo JK.m    | Acquired Time | 16-10-2018 11:56:11 |
| IRM Calibration Status | Success      | DA Method     | Default.m           |
| Comment                |              |               |                     |

|                |                             |
|----------------|-----------------------------|
| Sample Group   | Info.                       |
| Acquisition SW | 6200 series TOF/6500 series |
| Version        | Q-TOF B.05.01 (B5125.1)     |

#### Compound Table

| Compound Label    | RT  | Mass     | Formula    | MFG Formula | MFG Diff (ppm) | DB Formula |
|-------------------|-----|----------|------------|-------------|----------------|------------|
| Cpd 3: C21 H16 N2 | 0.1 | 296.1324 | C21 H16 N2 | C21 H16 N2  | -3.39          | C21 H16 N2 |

| Compound Label    | m/z      | RT  | Algorithm                 | Mass     |
|-------------------|----------|-----|---------------------------|----------|
| Cpd 3: C21 H16 N2 | 297.1396 | 0.1 | Find by Molecular Feature | 296.1324 |

#### MFE MS Spectrum



#### MFE MS Zoomed Spectrum



#### MS Spectrum Peak List

| m/z      | z | Abund      | Formula    | Ion     |
|----------|---|------------|------------|---------|
| 297.1396 | 1 | 30401246   | C21 H16 N2 | (M+H)+  |
| 298.1429 | 1 | 6969037.87 | C21 H16 N2 | (M+H)+  |
| 299.1462 | 1 | 825918.58  | C21 H16 N2 | (M+H)+  |
| 319.1219 | 1 | 63489.79   | C21 H16 N2 | (M+Na)+ |
| 320.1254 | 1 | 16798.34   | C21 H16 N2 | (M+Na)+ |

--- End Of Report ---

# <sup>1</sup>H NMR



**3-(3,4-Dimethoxyphenyl)-4-phenylisoquinoline ( 4c)**



<sup>13</sup>CNMR



**3-(3,4-Dimethoxyphenyl)-4-phenylisoquinoline (4c)**



# HRMS



## 3-(3,4-Dimethoxyphenyl)-4-phenylisoquinoline (4c)

|                               |              |                      |                     |
|-------------------------------|--------------|----------------------|---------------------|
| <b>Data File</b>              | SV-62.d      | <b>Sample Name</b>   | SV-62               |
| <b>Sample Type</b>            | Sample       | <b>Position</b>      | P1-D4               |
| <b>Instrument Name</b>        | Instrument 1 | <b>User Name</b>     |                     |
| <b>Acq Method</b>             | 29.10.2014.m | <b>Acquired Time</b> | 08-11-2016 13:07:39 |
| <b>IRM Calibration Status</b> | Success      | <b>DA Method</b>     | Default.m           |
| <b>Comment</b>                |              |                      |                     |

|                       |                             |              |
|-----------------------|-----------------------------|--------------|
| <b>Sample Group</b>   |                             | <b>Info.</b> |
| <b>Acquisition SW</b> | 6200 series TOF/6500 series |              |
| <b>Version</b>        | Q-TOF B.05.01 (B5125)       |              |

### Compound Table

| Compound Label      | RT | Mass     | Formula      | MFG Formula  | MFG Diff (ppm) | DB Formula   |
|---------------------|----|----------|--------------|--------------|----------------|--------------|
| Cpd 1: C23 H19 N O2 | 10 | 341.1414 | C23 H19 N O2 | C23 H19 N O2 | 0.58           | C23 H19 N O2 |

| Compound Label      | m/z      | RT | Algorithm                 | Mass     |
|---------------------|----------|----|---------------------------|----------|
| Cpd 1: C23 H19 N O2 | 342.1486 | 10 | Find by Molecular Feature | 341.1414 |

### MFE MS Spectrum



### MFE MS Zoomed Spectrum



### MS Spectrum Peak List

| m/z      | z | Abund     | Formula      | Ion     |
|----------|---|-----------|--------------|---------|
| 342.1486 | 1 | 4516414   | C23 H19 N O2 | (M+H)+  |
| 343.1521 | 1 | 1152703.1 | C23 H19 N O2 | (M+H)+  |
| 344.1546 | 1 | 151453.22 | C23 H19 N O2 | (M+H)+  |
| 345.1573 | 1 | 15492.53  | C23 H19 N O2 | (M+H)+  |
| 346.1622 | 1 | 1206.81   | C23 H19 N O2 | (M+H)+  |
| 364.1305 | 1 | 1443.25   | C23 H19 N O2 | (M+Na)+ |

--- End Of Report ---

# <sup>1</sup>H NMR



4-Phenyl-3-(4-(trifluoromethyl)phenyl)isoquinoline (4d)



# <sup>13</sup>C NMR



4-Phenyl-3-(4-(trifluoromethyl)phenyl)isoquinoline (4d)



# HRMS



**4-Phenyl-3-(4-(trifluoromethyl)phenyl)isoquinoline (4d)**



<sup>1</sup>H NMR



3-(4-fluorophenyl)-4-phenylisoquinoline (4e)



<sup>13</sup>C NMR



3-(4-fluorophenyl)-4-phenylisoquinoline (4e)



# HRMS



## 3-(4-fluorophenyl)-4-phenylisoquinoline (4e)

### Qualitative Compound Report

|                               |              |                      |                     |
|-------------------------------|--------------|----------------------|---------------------|
| <b>Data File</b>              | PKM-IQ-43.d  | <b>Sample Name</b>   | PKM-IQ-43           |
| <b>Sample Type</b>            | Sample       | <b>Position</b>      | P1-B6               |
| <b>Instrument Name</b>        | Instrument 1 | <b>User Name</b>     |                     |
| <b>Acq Method</b>             | 29.10.2014.m | <b>Acquired Time</b> | 28-07-2016 15:01:50 |
| <b>IRM Calibration Status</b> | Success      | <b>DA Method</b>     | Default.m           |
| <b>Comment</b>                |              |                      |                     |

|                       |                             |              |
|-----------------------|-----------------------------|--------------|
| <b>Sample Group</b>   |                             | <b>Info.</b> |
| <b>Acquisition SW</b> | 6200 series TOF/6500 series |              |
| <b>Version</b>        | Q-TOF B.05.01 (B5125)       |              |

#### Compound Table

| Compound Label     | RT | Mass     | Formula     | MFG Formula | MFG Diff (ppm) | DB Formula  |
|--------------------|----|----------|-------------|-------------|----------------|-------------|
| Cpd 1: C21 H14 F N | 10 | 299.1126 | C21 H14 F N | C21 H14 F N | -5.18          | C21 H14 F N |

| Compound Label     | m/z      | RT | Algorithm                 | Mass     |
|--------------------|----------|----|---------------------------|----------|
| Cpd 1: C21 H14 F N | 300.1198 | 10 | Find by Molecular Feature | 299.1126 |

#### MFE MS Spectrum



#### MFE MS Zoomed Spectrum



#### MS Spectrum Peak List

| m/z      | z | Abund      | Formula     | Ion    |
|----------|---|------------|-------------|--------|
| 300.1198 | 1 | 7511005    | C21 H14 F N | (M+H)+ |
| 301.1233 | 1 | 1759292.74 | C21 H14 F N | (M+H)+ |
| 302.1264 | 1 | 186426.43  | C21 H14 F N | (M+H)+ |
| 303.1296 | 1 | 13884.88   | C21 H14 F N | (M+H)+ |

--- End Of Report ---

# <sup>1</sup>H NMR



**3-(3,5-Bis(trifluoromethyl)phenyl)-4-phenylisoquinoline (4f)**



Cc1ccc(cc1)-c2c3ccccc3nc2-c4cc(C(F)(F)F)cc(C(F)(F)F)c4

# HRMS



## 3-(3,5-Bis(trifluoromethyl)phenyl)-4-phenylisoquinoline (4f)



|                               |              |                      |                     |
|-------------------------------|--------------|----------------------|---------------------|
| <b>Data File</b>              | SV-59.d      | <b>Sample Name</b>   | SV-59               |
| <b>Sample Type</b>            | Sample       | <b>Position</b>      | P1-A4               |
| <b>Instrument Name</b>        | Instrument 1 | <b>User Name</b>     |                     |
| <b>Acq Method</b>             | 29.10.2014.m | <b>Acquired Time</b> | 03-11-2016 13:00:01 |
| <b>IRM Calibration Status</b> | Success      | <b>DA Method</b>     | Default.m           |
| <b>Comment</b>                |              |                      |                     |

|                       |                             |              |
|-----------------------|-----------------------------|--------------|
| <b>Sample Group</b>   |                             | <b>Info.</b> |
| <b>Acquisition SW</b> | 6200 series TOF/6500 series |              |
| <b>Version</b>        | Q-TOF B.05.01 (B5125)       |              |

### Compound Table

| Compound Label      | RT | Mass    | Formula      | MFG Formula  | MFG Diff (ppm) | DB Formula   |
|---------------------|----|---------|--------------|--------------|----------------|--------------|
| Cpd 1: C23 H13 F6 N | 10 | 417.095 | C23 H13 F6 N | C23 H13 F6 N | 0.45           | C23 H13 F6 N |

| Compound Label      | m/z      | RT | Algorithm                 | Mass    |
|---------------------|----------|----|---------------------------|---------|
| Cpd 1: C23 H13 F6 N | 418.1023 | 10 | Find by Molecular Feature | 417.095 |

### MFE MS Spectrum



### MFE MS Zoomed Spectrum



### MS Spectrum Peak List

| m/z      | z | Abund      | Formula      | Ion    |
|----------|---|------------|--------------|--------|
| 418.1023 | 1 | 4226486    | C23 H13 F6 N | (M+H)+ |
| 419.1057 | 1 | 1072548.48 | C23 H13 F6 N | (M+H)+ |
| 420.1085 | 1 | 124378.42  | C23 H13 F6 N | (M+H)+ |
| 421.1124 | 1 | 8710.26    | C23 H13 F6 N | (M+H)+ |
| 422.1151 | 1 | 681.85     | C23 H13 F6 N | (M+H)+ |

--- End Of Report ---

CC1=CC=C(C=C1)C2=CC=CC=C2N=C3C=CC(=C3)C(=C4C=CC(=C4)C(F)=CC(F)=C4C(F)(F)F)C5=CC=CC=C5

<sup>13</sup>C NMR



**3-(3-Fluoro-5-(trifluoromethyl)phenyl)-4-phenylisoquinoline (4g)**



# HRMS



## 3-(3-Fluoro-5-(trifluoromethyl)phenyl)-4-phenylisoquinoline (4g)

### Qualitative Compound Report

|                        |              |               |                     |
|------------------------|--------------|---------------|---------------------|
| Data File              | SV-60.d      | Sample Name   | SV-60               |
| Sample Type            | Sample       | Position      | P1-C7               |
| Instrument Name        | Instrument 1 | User Name     |                     |
| Acq Method             | 29.10.2014.m | Acquired Time | 03-11-2016 13:02:55 |
| IRM Calibration Status | Success      | DA Method     | Default.m           |
| Comment                |              |               |                     |

|                |                             |
|----------------|-----------------------------|
| Sample Group   | Info.                       |
| Acquisition SW | 6200 series TOF/6500 series |
| Version        | Q-TOF B.05.01 (B5125)       |

#### Compound Table

| Compound Label      | RT | Mass     | Formula      | MFG Formula  | MFG Diff (ppm) | DB Formula   |
|---------------------|----|----------|--------------|--------------|----------------|--------------|
| Cpd 1: C22 H13 F4 N | 10 | 367.0984 | C22 H13 F4 N | C22 H13 F4 N | 0              | C22 H13 F4 N |

| Compound Label      | m/z      | RT | Algorithm                 | Mass     |
|---------------------|----------|----|---------------------------|----------|
| Cpd 1: C22 H13 F4 N | 368.1056 | 10 | Find by Molecular Feature | 367.0984 |

#### MFE MS Spectrum



#### MFE MS Zoomed Spectrum



#### MS Spectrum Peak List

| m/z      | z | Abund      | Formula      | Ion    |
|----------|---|------------|--------------|--------|
| 368.1056 | 1 | 10286094   | C22 H13 F4 N | (M+H)+ |
| 369.1092 | 1 | 2506624.08 | C22 H13 F4 N | (M+H)+ |
| 370.1128 | 1 | 278322.4   | C22 H13 F4 N | (M+H)+ |
| 371.1164 | 1 | 22835.16   | C22 H13 F4 N | (M+H)+ |
| 372.1178 | 1 | 1557.23    | C22 H13 F4 N | (M+H)+ |

--- End Of Report ---

# <sup>1</sup>H NMR



3-(Benzo[d][1,3]dioxol-5-yl)-7-bromo-4-phenylisoquinoline (4h)



# <sup>13</sup>C NMR



3-(Benzo[d][1,3]dioxol-5-yl)-7-bromo-4-phenylisoquinoline (4h)



# HRMS



## 3-(Benzo[d][1,3]dioxol-5-yl)-7-bromo-4-phenylisoquinoline (4h)

### Qualitative Compound Report

|                               |              |                      |                     |
|-------------------------------|--------------|----------------------|---------------------|
| <b>Data File</b>              | SV-116.d     | <b>Sample Name</b>   | SV-116              |
| <b>Sample Type</b>            | Sample       | <b>Position</b>      | P1-A1               |
| <b>Instrument Name</b>        | Instrument 1 | <b>User Name</b>     |                     |
| <b>Acq Method</b>             | 29.10.2014.m | <b>Acquired Time</b> | 26-09-2016 13:21:54 |
| <b>IRM Calibration Status</b> | Success      | <b>DA Method</b>     | Default.m           |
| <b>Comment</b>                |              |                      |                     |

|                       |                             |              |
|-----------------------|-----------------------------|--------------|
| <b>Sample Group</b>   |                             | <b>Info.</b> |
| <b>Acquisition SW</b> | 6200 series TOF/6500 series |              |
| <b>Version</b>        | Q-TOF B.05.01 (B5125)       |              |

#### Compound Table

| Compound Label         | RT | Mass     | Formula         | MFG Formula     | MFG Diff (ppm) | DB Formula      |
|------------------------|----|----------|-----------------|-----------------|----------------|-----------------|
| Cpd 2: C22 H14 Br N O2 | 11 | 403.0194 | C22 H14 Br N O2 | C22 H14 Br N O2 | 3.43           | C22 H14 Br N O2 |

| Compound Label         | m/z      | RT | Algorithm                 | Mass     |
|------------------------|----------|----|---------------------------|----------|
| Cpd 2: C22 H14 Br N O2 | 404.0267 | 11 | Find by Molecular Feature | 403.0194 |

#### MFE MS Spectrum



#### MFE MS Zoomed Spectrum



#### MS Spectrum Peak List

| m/z      | z | Abund      | Formula         | Ion    |
|----------|---|------------|-----------------|--------|
| 404.0267 | 1 | 1271280.63 | C22 H14 Br N O2 | (M+H)+ |
| 405.0297 | 1 | 304592.41  | C22 H14 Br N O2 | (M+H)+ |
| 406.025  | 1 | 1258739.73 | C22 H14 Br N O2 | (M+H)+ |
| 407.0279 | 1 | 299227.85  | C22 H14 Br N O2 | (M+H)+ |
| 408.0304 | 1 | 38359.24   | C22 H14 Br N O2 | (M+H)+ |
| 409.0328 | 1 | 3403.24    | C22 H14 Br N O2 | (M+H)+ |
| 410.0407 | 1 | 236.63     | C22 H14 Br N O2 | (M+H)+ |

--- End Of Report ---

# <sup>1</sup>H NMR



7-Chloro-4-phenyl-3-(3,4,5-trimethoxyphenyl)isoquinoline (4i)



# <sup>13</sup>C NMR



7-Chloro-4-phenyl-3-(3,4,5-trimethoxyphenyl)isoquinoline (4i)



# HRMS



7-Chloro-4-phenyl-3-(3,4,5-trimethoxyphenyl)isoquinoline (4i)

## Qualitative Compound Report

|                        |              |               |                     |
|------------------------|--------------|---------------|---------------------|
| Data File              | SV-26.d      | Sample Name   | SV-26               |
| Sample Type            | Sample       | Position      | P1-A8               |
| Instrument Name        | Instrument 1 | User Name     |                     |
| Acq Method             | 29.10.2014.m | Acquired Time | 07-11-2016 12:55:15 |
| IRM Calibration Status | Success      | DA Method     | Default.m           |
| Comment                |              |               |                     |

|                |                             |
|----------------|-----------------------------|
| Sample Group   | Info.                       |
| Acquisition SW | 6200 series TOF/6500 series |
| Version        | Q-TOF B.05.01 (B5125)       |

### Compound Table

| Compound Label                                            | RT | Mass     | Formula                                            | MFG Formula                                        | MFG Diff (ppm) | DB Formula                                         |
|-----------------------------------------------------------|----|----------|----------------------------------------------------|----------------------------------------------------|----------------|----------------------------------------------------|
| Cpd 1: C <sub>24</sub> H <sub>20</sub> ClN O <sub>3</sub> | 10 | 405.1136 | C <sub>24</sub> H <sub>20</sub> ClN O <sub>3</sub> | C <sub>24</sub> H <sub>20</sub> ClN O <sub>3</sub> | -1.09          | C <sub>24</sub> H <sub>20</sub> ClN O <sub>3</sub> |

| Compound Label                                            | m/z      | RT | Algorithm                 | Mass     |
|-----------------------------------------------------------|----------|----|---------------------------|----------|
| Cpd 1: C <sub>24</sub> H <sub>20</sub> ClN O <sub>3</sub> | 406.1208 | 10 | Find by Molecular Feature | 405.1136 |

### MFE MS Spectrum



### MFE MS Zoomed Spectrum



### MS Spectrum Peak List

| m/z      | z | Abund      | Formula                                            | Ion    |
|----------|---|------------|----------------------------------------------------|--------|
| 406.1208 | 1 | 3880098.75 | C <sub>24</sub> H <sub>20</sub> ClN O <sub>3</sub> | (M+H)+ |
| 407.1244 | 1 | 1021522.64 | C <sub>24</sub> H <sub>20</sub> ClN O <sub>3</sub> | (M+H)+ |
| 408.119  | 1 | 1367625.94 | C <sub>24</sub> H <sub>20</sub> ClN O <sub>3</sub> | (M+H)+ |
| 409.1215 | 1 | 334634.97  | C <sub>24</sub> H <sub>20</sub> ClN O <sub>3</sub> | (M+H)+ |
| 410.1241 | 1 | 47794.13   | C <sub>24</sub> H <sub>20</sub> ClN O <sub>3</sub> | (M+H)+ |
| 411.1257 | 1 | 5429.73    | C <sub>24</sub> H <sub>20</sub> ClN O <sub>3</sub> | (M+H)+ |
| 412.1244 | 1 | 411.71     | C <sub>24</sub> H <sub>20</sub> ClN O <sub>3</sub> | (M+H)+ |

--- End Of Report ---

# <sup>1</sup>H NMR



Methyl 4-(7-chloro-4-phenylisoquinolin-3-yl)benzoate (4j)



# <sup>13</sup>C NMR



Methyl 4-(7-chloro-4-phenylisoquinolin-3-yl)benzoate ( 4j)



# HRMS



## Methyl 4-(7-chloro-4-phenylisoquinolin-3-yl)benzoate ( 4j)

### Qualitative Compound Report

|                               |              |                      |                     |
|-------------------------------|--------------|----------------------|---------------------|
| <b>Data File</b>              | PKM-325.d    | <b>Sample Name</b>   | PKM-325             |
| <b>Sample Type</b>            | Sample       | <b>Position</b>      | P1-D2               |
| <b>Instrument Name</b>        | Instrument 1 | <b>User Name</b>     |                     |
| <b>Acq Method</b>             | 29.10.2014.m | <b>Acquired Time</b> | 18-10-2016 15:05:03 |
| <b>IRM Calibration Status</b> | Success      | <b>DA Method</b>     | Default.m           |
| <b>Comment</b>                |              |                      |                     |

|                       |                             |              |
|-----------------------|-----------------------------|--------------|
| <b>Sample Group</b>   |                             | <b>Info.</b> |
| <b>Acquisition SW</b> | 6200 series TOF/6500 series |              |
| <b>Version</b>        | Q-TOF B.05.01 (B5125)       |              |

#### Compound Table

| Compound Label         | RT | Mass     | Formula         | MFG Formula     | MFG Diff (ppm) | DB Formula      |
|------------------------|----|----------|-----------------|-----------------|----------------|-----------------|
| Cpd 3: C23 H16 Cl N O2 | 12 | 373.0871 | C23 H16 Cl N O2 | C23 H16 Cl N O2 | -0.38          | C23 H16 Cl N O2 |

| Compound Label         | m/z      | RT | Algorithm                 | Mass     |
|------------------------|----------|----|---------------------------|----------|
| Cpd 3: C23 H16 Cl N O2 | 374.0944 | 12 | Find by Molecular Feature | 373.0871 |

#### MFE MS Spectrum



#### MFE MS Zoomed Spectrum



#### MS Spectrum Peak List

| m/z      | z | Abund      | Formula         | Ion    |
|----------|---|------------|-----------------|--------|
| 374.0944 | 1 | 1860711.13 | C23 H16 Cl N O2 | (M+H)+ |
| 375.0976 | 1 | 474475.62  | C23 H16 Cl N O2 | (M+H)+ |
| 376.0924 | 1 | 651195.55  | C23 H16 Cl N O2 | (M+H)+ |
| 377.0949 | 1 | 148055.49  | C23 H16 Cl N O2 | (M+H)+ |
| 378.0975 | 1 | 19214.4    | C23 H16 Cl N O2 | (M+H)+ |

--- End Of Report ---

# <sup>1</sup>H NMR



4-(7-Chloro-4-phenylisoquinolin-3-yl)benzonitrile (4k)



**$^{13}\text{C}$  NMR**



**4-(7-Chloro-4-phenylisoquinolin-3-yl)benzonitrile ( 4k)**



# HRMS



## 4-(7-Chloro-4-phenylisoquinolin-3-yl)benzonitrile ( 4k)

### Qualitative Compound Report

|                               |              |                      |                     |
|-------------------------------|--------------|----------------------|---------------------|
| <b>Data File</b>              | PKM-320.d    | <b>Sample Name</b>   | PKM-320             |
| <b>Sample Type</b>            | Sample       | <b>Position</b>      | P1-C2               |
| <b>Instrument Name</b>        | Instrument 1 | <b>User Name</b>     |                     |
| <b>Acq Method</b>             | 29.10.2014.m | <b>Acquired Time</b> | 19-10-2016 13:22:06 |
| <b>IRM Calibration Status</b> | Success      | <b>DA Method</b>     | Default.m           |
| <b>Comment</b>                |              |                      |                     |

|                       |                             |              |
|-----------------------|-----------------------------|--------------|
| <b>Sample Group</b>   |                             | <b>Info.</b> |
| <b>Acquisition SW</b> | 6200 series TOF/6500 series |              |
| <b>Version</b>        | Q-TOF B.05.01 (B5125)       |              |

#### Compound Table

| Compound Label       | RT | Mass     | Formula       | MFG Formula   | MFG Diff (ppm) | DB Formula    |
|----------------------|----|----------|---------------|---------------|----------------|---------------|
| Cpd 4: C22 H13 Cl N2 | 11 | 340.0766 | C22 H13 Cl N2 | C22 H13 Cl N2 | 0.43           | C22 H13 Cl N2 |

| Compound Label       | m/z      | RT | Algorithm                 | Mass     |
|----------------------|----------|----|---------------------------|----------|
| Cpd 4: C22 H13 Cl N2 | 341.0839 | 11 | Find by Molecular Feature | 340.0766 |

#### MFE MS Spectrum



#### MFE MS Zoomed Spectrum



#### MS Spectrum Peak List

| m/z      | z | Abund     | Formula       | Ion    |
|----------|---|-----------|---------------|--------|
| 341.0839 | 1 | 725500.94 | C22 H13 Cl N2 | (M+H)+ |
| 342.0868 | 1 | 168264.21 | C22 H13 Cl N2 | (M+H)+ |
| 343.0817 | 1 | 232616.72 | C22 H13 Cl N2 | (M+H)+ |
| 344.0843 | 1 | 52519.69  | C22 H13 Cl N2 | (M+H)+ |
| 345.087  | 1 | 6343.28   | C22 H13 Cl N2 | (M+H)+ |
| 346.0929 | 1 | 440.22    | C22 H13 Cl N2 | (M+H)+ |

--- End Of Report ---

# <sup>1</sup>H NMR



4-Phenyl-3-(thiophen-2-yl)isoquinoline (4l)



**$^{13}\text{C}$  NMR**



**4-Phenyl-3-(thiophen-2-yl)isoquinoline ( 4l)**



# HRMS



## 4-Phenyl-3-(thiophen-2-yl)isoquinoline ( 4l)

| Compound Table     |    |          |             |             |                |             |
|--------------------|----|----------|-------------|-------------|----------------|-------------|
| Compound Label     | RT | Mass     | Formula     | MFG Formula | MFG Diff (ppm) | DB Formula  |
| Cpd 2: C19 H13 N S | 11 | 287.0778 | C19 H13 N S | C19 H13 N S | -3.3           | C19 H13 N S |

| Compound Label     | m/z      | RT | Algorithm                 | Mass     |
|--------------------|----------|----|---------------------------|----------|
| Cpd 2: C19 H13 N S | 288.0851 | 11 | Find by Molecular Feature | 287.0778 |

MFE MS Spectrum



MFE MS Zoomed Spectrum



MS Spectrum Peak List

| m/z      | z | Abund      | Formula     | Ion    |
|----------|---|------------|-------------|--------|
| 288.0851 | 1 | 10745910   | C19 H13 N S | (M+H)+ |
| 289.0883 | 1 | 2386284.26 | C19 H13 N S | (M+H)+ |
| 290.0848 | 1 | 656845.03  | C19 H13 N S | (M+H)+ |
| 291.0857 | 1 | 106192.44  | C19 H13 N S | (M+H)+ |
| 292.088  | 1 | 13843.11   | C19 H13 N S | (M+H)+ |

--- End Of Report ---

# <sup>1</sup>H NMR



7-Chloro-4-phenyl-3-(thiophen-2-yl)isoquinoline ( (4m)



# <sup>13</sup>C NMR



7-Chloro-4-phenyl-3-(thiophen-2-yl)isoquinoline ( (4m)



# HRMS



## 7-Chloro-4-phenyl-3-(thiophen-2-yl)isoquinoline ( (4m)

### Qualitative Compound Report

|                        |              |               |                     |
|------------------------|--------------|---------------|---------------------|
| Data File              | SV-25.d      | Sample Name   | SV-25               |
| Sample Type            | Sample       | Position      | P1-B2               |
| Instrument Name        | Instrument 1 | User Name     |                     |
| Acq Method             | 29.10.2014.m | Acquired Time | 07-11-2016 12:53:21 |
| IRM Calibration Status | Success      | DA Method     | Default.m           |
| Comment                |              |               |                     |

|                |                             |
|----------------|-----------------------------|
| Sample Group   | Info.                       |
| Acquisition SW | 6200 series TOF/6500 series |
| Version        | Q-TOF B.05.01 (B5125)       |

#### Compound Table

| Compound Label        | RT | Mass     | Formula        | MFG Formula    | MFG Diff (ppm) | DB Formula     |
|-----------------------|----|----------|----------------|----------------|----------------|----------------|
| Cpd 5: C19 H12 Cl N S | 12 | 321.0381 | C19 H12 Cl N S | C19 H12 Cl N S | -0.55          | C19 H12 Cl N S |

| Compound Label        | m/z      | RT | Algorithm                 | Mass     |
|-----------------------|----------|----|---------------------------|----------|
| Cpd 5: C19 H12 Cl N S | 322.0455 | 12 | Find by Molecular Feature | 321.0381 |

#### MFE MS Spectrum



#### MFE MS Zoomed Spectrum



#### MS Spectrum Peak List

| m/z      | z | Abund     | Formula        | Ion    |
|----------|---|-----------|----------------|--------|
| 322.0455 | 1 | 831243.63 | C19 H12 Cl N S | (M+H)+ |
| 323.0482 | 1 | 172612.79 | C19 H12 Cl N S | (M+H)+ |
| 324.0427 | 1 | 302523.35 | C19 H12 Cl N S | (M+H)+ |
| 325.0453 | 1 | 61718.91  | C19 H12 Cl N S | (M+H)+ |
| 326.042  | 1 | 15988.63  | C19 H12 Cl N S | (M+H)+ |

--- End Of Report ---

# <sup>1</sup>H NMR



7-Bromo-4-phenyl-3-(thiophen-2-yl)isoquinoline ( (4n)



**<sup>13</sup>C NMR**



**7-Bromo-4-phenyl-3-(thiophen-2-yl)isoquinoline ( (4n)**



# HRMS



## 7-Bromo-4-phenyl-3-(thiophen-2-yl)isoquinoline ( (4n)

### Qualitative Compound Report

|                        |              |               |                     |
|------------------------|--------------|---------------|---------------------|
| Data File              | SV-19.d      | Sample Name   | SV-19               |
| Sample Type            | Sample       | Position      | P1-F2               |
| Instrument Name        | Instrument 1 | User Name     |                     |
| Acq Method             | 29.10.2014.m | Acquired Time | 08-11-2016 13:10:32 |
| IRM Calibration Status | Success      | DA Method     | Default.m           |
| Comment                |              |               |                     |

|                |                             |
|----------------|-----------------------------|
| Sample Group   | Info.                       |
| Acquisition SW | 6200 series TOF/6500 series |
| Version        | Q-TOF B.05.01 (B5125)       |

#### Compound Table

| Compound Label        | RT | Mass     | Formula        | MFG Formula    | MFG Diff (ppm) | DB Formula     |
|-----------------------|----|----------|----------------|----------------|----------------|----------------|
| Cpd 1: C19 H12 Br N S | 10 | 364.9874 | C19 H12 Br N S | C19 H12 Br N S | -0.06          | C19 H12 Br N S |

| Compound Label        | m/z      | RT | Algorithm                 | Mass     |
|-----------------------|----------|----|---------------------------|----------|
| Cpd 1: C19 H12 Br N S | 365.9947 | 10 | Find by Molecular Feature | 364.9874 |

#### MFE MS Spectrum



#### MFE MS Zoomed Spectrum



#### MS Spectrum Peak List

| m/z      | z | Abund      | Formula        | Ion    |
|----------|---|------------|----------------|--------|
| 365.9947 | 1 | 1231514.62 | C19 H12 Br N S | (M+H)+ |
| 366.9976 | 1 | 259836.98  | C19 H12 Br N S | (M+H)+ |
| 367.9928 | 1 | 1285369.5  | C19 H12 Br N S | (M+H)+ |
| 368.9954 | 1 | 263308.03  | C19 H12 Br N S | (M+H)+ |
| 369.9916 | 1 | 70674.96   | C19 H12 Br N S | (M+H)+ |
| 370.9922 | 1 | 11416.74   | C19 H12 Br N S | (M+H)+ |
| 371.9941 | 1 | 1376.38    | C19 H12 Br N S | (M+H)+ |

--- End Of Report ---

<sup>1</sup>H NMR



3-(Pyridin-4-yl)-4-(thiophen-2-yl)isoquinoline (4o)



<sup>13</sup>C NMR



**3-(Pyridin-4-yl)-4-(thiophen-2-yl)isoquinoline (4o)**



# HRMS



## 3-(Pyridin-4-yl)-4-(thiophen-2-yl)isoquinoline (4o)

### Qualitative Compound Report

|                               |              |                      |                     |
|-------------------------------|--------------|----------------------|---------------------|
| <b>Data File</b>              | AB 623B.d    | <b>Sample Name</b>   | AB 623B             |
| <b>Sample Type</b>            | Sample       | <b>Position</b>      | P2-B6               |
| <b>Instrument Name</b>        | Instrument 1 | <b>User Name</b>     | SMILY               |
| <b>Acq Method</b>             | 29.10.2014.m | <b>Acquired Time</b> | 26-08-2015 15:23:43 |
| <b>IRM Calibration Status</b> |              | <b>DA Method</b>     | Default.m           |
| <b>Comment</b>                |              |                      |                     |

|                       |                             |              |
|-----------------------|-----------------------------|--------------|
| <b>Sample Group</b>   |                             | <b>Info.</b> |
| <b>Acquisition SW</b> | 6200 series TOF/6500 series |              |
| <b>Version</b>        | Q-TOF B.05.01 (B5125)       |              |

#### Compound Table

| Compound Label      | RT | Mass     | Formula      | MFG Formula  | MFG Diff (ppm) | DB Formula   |
|---------------------|----|----------|--------------|--------------|----------------|--------------|
| Cpd 2: C18 H12 N2 S | 11 | 288.0726 | C18 H12 N2 S | C18 H12 N2 S | -1.79          | C18 H12 N2 S |

| Compound Label      | m/z      | RT | Algorithm                 | Mass     |
|---------------------|----------|----|---------------------------|----------|
| Cpd 2: C18 H12 N2 S | 289.0799 | 11 | Find by Molecular Feature | 288.0726 |

#### MFE MS Spectrum



#### MFE MS Zoomed Spectrum



#### MS Spectrum Peak List

| m/z      | z | Abund     | Formula      | Ion    |
|----------|---|-----------|--------------|--------|
| 289.0799 | 1 | 872568.75 | C18 H12 N2 S | (M+H)+ |
| 290.0828 | 1 | 174718.74 | C18 H12 N2 S | (M+H)+ |

--- End Of Report ---

# <sup>1</sup>H NMR



3-(1-Methyl-1*H*-indol-3-yl)-4-phenylisoquinoline (4p)



**<sup>13</sup>C NMR**



**3-(1-Methyl-1*H*-indol-3-yl)-4-phenylisoquinoline (4p)**



# HRMS



## 3-(1-Methyl-1H-indol-3-yl)-4-phenylisoquinoline (4p)

### Qualitative Compound Report

|                               |              |                      |                     |
|-------------------------------|--------------|----------------------|---------------------|
| <b>Data File</b>              | PKM-351.d    | <b>Sample Name</b>   | PKM-351             |
| <b>Sample Type</b>            | Sample       | <b>Position</b>      | P1-A7               |
| <b>Instrument Name</b>        | Instrument 1 | <b>User Name</b>     |                     |
| <b>Acq Method</b>             | 29.10.2014.m | <b>Acquired Time</b> | 11-01-2017 13:49:33 |
| <b>IRM Calibration Status</b> | Success      | <b>DA Method</b>     | Default.m           |
| <b>Comment</b>                |              |                      |                     |

|                       |                             |              |
|-----------------------|-----------------------------|--------------|
| <b>Sample Group</b>   |                             | <b>Info.</b> |
| <b>Acquisition SW</b> | 6200 series TOF/6500 series |              |
| <b>Version</b>        | Q-TOF B.05.01 (B5125)       |              |

#### Compound Table

| Compound Label    | RT | Mass     | Formula    | MFG Formula | MFG Diff (ppm) | DB Formula |
|-------------------|----|----------|------------|-------------|----------------|------------|
| Cpd 1: C24 H18 N2 | 12 | 334.1479 | C24 H18 N2 | C24 H18 N2  | -2.8           | C24 H18 N2 |

| Compound Label    | m/z      | RT | Algorithm                 | Mass     |
|-------------------|----------|----|---------------------------|----------|
| Cpd 1: C24 H18 N2 | 335.1552 | 12 | Find by Molecular Feature | 334.1479 |

#### MFE MS Spectrum



#### MFE MS Zoomed Spectrum



#### MS Spectrum Peak List

| m/z      | z | Abund      | Formula    | Ion     |
|----------|---|------------|------------|---------|
| 335.1552 | 1 | 4038209.75 | C24 H18 N2 | (M+H)+  |
| 336.1585 | 1 | 1088474.16 | C24 H18 N2 | (M+H)+  |
| 337.1613 | 1 | 129595.82  | C24 H18 N2 | (M+H)+  |
| 338.1643 | 1 | 11073.37   | C24 H18 N2 | (M+H)+  |
| 339.1573 | 1 | 907.8      | C24 H18 N2 | (M+H)+  |
| 357.1372 | 1 | 11058.17   | C24 H18 N2 | (M+Na)+ |
| 358.1407 | 1 | 2148.62    | C24 H18 N2 | (M+Na)+ |
| 373.1126 | 1 | 1996.75    | C24 H18 N2 | (M+K)+  |
| 669.3002 | 1 | 4445.59    | C24 H18 N2 | (2M+H)+ |
| 670.3059 | 1 | 2430.72    | C24 H18 N2 | (2M+H)+ |

--- End Of Report ---

# <sup>1</sup>H NMR



4-Phenyl-3-(pyridin-4-yl)isoquinoline ( 4q)



**$^{13}\text{C}$  NMR**



**4-Phenyl-3-(pyridin-4-yl)isoquinoline (4q)**



# HRMS



**4-Phenyl-3-(pyridin-4-yl)isoquinoline ( 4q)**

|               |            |             |              |                 |              |                        |                     |
|---------------|------------|-------------|--------------|-----------------|--------------|------------------------|---------------------|
| Sample Name   | AB 618BR   | Position    | P2-E5        | Instrument Name | Instrument 1 | User Name              | SMILY               |
| Inj Vol       | 1          | InjPosition |              | SampleType      | Sample       | IRM Calibration Status | Success             |
| Data Filename | AB 618BR.d | ACQ Method  | 29.10.2014.m | Comment         |              | Acquired Time          | 02-09-2015 12:45:15 |



# <sup>1</sup>H NMR



4-(4-*tert*-Butyl)phenyl)-3-phenylisoquinoline (4r)



<sup>13</sup>C NMR



4-(4-(*tert*-Butyl)phenyl)-3-phenylisoquinoline (4r)



# HRMS



## 4-(4-(*tert*-Butyl)phenyl)-3-phenylisoquinoline (4r)

### Qualitative Compound Report

Data File SV-79.d Sample Name SV-79  
Sample Type Sample Position P1-A8  
Instrument Name Instrument 1 User Name  
Acq Method 29.10.2014.m Acquired Time 27-10-2016 14:29:00  
IRM Calibration Status Success DA Method Default.m  
Comment

Sample Group Info.  
Acquisition SW 6200 series TOF/6500 series  
Version Q-TOF B.05.01 (B5125)

#### Compound Table

| Compound Label   | RT | Mass     | Formula   | MFG Formula | MFG Diff (ppm) | DB Formula |
|------------------|----|----------|-----------|-------------|----------------|------------|
| Cpd 1: C25 H23 N | 16 | 337.1824 | C25 H23 N | C25 H23 N   | 1.92           | C25 H23 N  |

| Compound Label   | m/z      | RT | Algorithm                 | Mass     |
|------------------|----------|----|---------------------------|----------|
| Cpd 1: C25 H23 N | 338.1896 | 16 | Find by Molecular Feature | 337.1824 |

#### MFE MS Spectrum



#### MFE MS Zoomed Spectrum



#### MS Spectrum Peak List

| m/z      | z | Abund      | Formula   | Ion    |
|----------|---|------------|-----------|--------|
| 338.1896 | 1 | 7648923    | C25 H23 N | (M+H)+ |
| 339.1932 | 1 | 2080001.37 | C25 H23 N | (M+H)+ |
| 340.1963 | 1 | 267459.2   | C25 H23 N | (M+H)+ |
| 341.1995 | 1 | 21559.01   | C25 H23 N | (M+H)+ |
| 342.2017 | 1 | 1750.4     | C25 H23 N | (M+H)+ |

--- End Of Report ---

# <sup>1</sup>H NMR



3,4-Diphenylbenzo[*h*]isoquinoline (5a)



<sup>13</sup>C NMR



3,4-Diphenylbenzo[*h*]isoquinoline (5a)



# HRMS



## 3,4-Diphenylbenzo[h]isoquinoline (5a)

### Qualitative Compound Report

|                               |              |                      |                     |
|-------------------------------|--------------|----------------------|---------------------|
| <b>Data File</b>              | PKM-353.d    | <b>Sample Name</b>   | PKM-353             |
| <b>Sample Type</b>            | Sample       | <b>Position</b>      | P1-E7               |
| <b>Instrument Name</b>        | Instrument 1 | <b>User Name</b>     |                     |
| <b>Acq Method</b>             | 29.10.2014.m | <b>Acquired Time</b> | 09-01-2017 12:10:21 |
| <b>IRM Calibration Status</b> | Success      | <b>DA Method</b>     | Default.m           |
| <b>Comment</b>                |              |                      |                     |

|                       |                             |              |
|-----------------------|-----------------------------|--------------|
| <b>Sample Group</b>   |                             | <b>Info.</b> |
| <b>Acquisition SW</b> | 6200 series TOF/6500 series |              |
| <b>Version</b>        | Q-TOF B.05.01 (B5125)       |              |

#### Compound Table

| Compound Label                           | RT | Mass     | Formula                           | MFG Formula                       | MFG Diff (ppm) | DB Formula                        |
|------------------------------------------|----|----------|-----------------------------------|-----------------------------------|----------------|-----------------------------------|
| Cpd 4: C <sub>25</sub> H <sub>17</sub> N | 11 | 331.1333 | C <sub>25</sub> H <sub>17</sub> N | C <sub>25</sub> H <sub>17</sub> N | 8.41           | C <sub>25</sub> H <sub>17</sub> N |

| Compound Label                           | m/z      | RT | Algorithm                 | Mass     |
|------------------------------------------|----------|----|---------------------------|----------|
| Cpd 4: C <sub>25</sub> H <sub>17</sub> N | 332.1406 | 11 | Find by Molecular Feature | 331.1333 |

#### MFE MS Spectrum



#### MFE MS Zoomed Spectrum



#### MS Spectrum Peak List

| m/z      | z | Abund     | Formula                           | Ion                |
|----------|---|-----------|-----------------------------------|--------------------|
| 332.1406 | 1 | 334023.41 | C <sub>25</sub> H <sub>17</sub> N | (M+H) <sup>+</sup> |
| 333.1438 | 1 | 89912.26  | C <sub>25</sub> H <sub>17</sub> N | (M+H) <sup>+</sup> |
| 334.1468 | 1 | 12194.34  | C <sub>25</sub> H <sub>17</sub> N | (M+H) <sup>+</sup> |

--- End Of Report ---

# <sup>1</sup>H NMR



**3-(4-Methoxyphenyl)-4-phenylbenzo[*h*]isoquinoline (5b)**



**<sup>13</sup>C NMR**



**3-(4-Methoxyphenyl)-4-phenylbenzo[*h*]isoquinoline (5b)**



# HRMS



## 3-(4-Methoxyphenyl)-4-phenylbenzo[h]isoquinoline (5b)

### Qualitative Compound Report

|                               |              |                      |                     |
|-------------------------------|--------------|----------------------|---------------------|
| <b>Data File</b>              | PKM-354.d    | <b>Sample Name</b>   | PKM-354             |
| <b>Sample Type</b>            | Sample       | <b>Position</b>      | P1-C4               |
| <b>Instrument Name</b>        | Instrument 1 | <b>User Name</b>     |                     |
| <b>Acq Method</b>             | 29.10.2014.m | <b>Acquired Time</b> | 11-01-2017 16:12:11 |
| <b>IRM Calibration Status</b> | Success      | <b>DA Method</b>     | Default.m           |
| <b>Comment</b>                |              |                      |                     |

|                       |                             |              |
|-----------------------|-----------------------------|--------------|
| <b>Sample Group</b>   |                             | <b>Info.</b> |
| <b>Acquisition SW</b> | 6200 series TOF/6500 series |              |
| <b>Version</b>        | Q-TOF B.05.01 (B5125)       |              |

#### Compound Table

| Compound Label                              | RT | Mass     | Formula                             | MFG Formula                         | MFG Diff (ppm) | DB Formula                          |
|---------------------------------------------|----|----------|-------------------------------------|-------------------------------------|----------------|-------------------------------------|
| Cpd 30: C <sub>26</sub> H <sub>19</sub> N O | 11 | 361.1472 | C <sub>26</sub> H <sub>19</sub> N O | C <sub>26</sub> H <sub>19</sub> N O | -1.59          | C <sub>26</sub> H <sub>19</sub> N O |

| Compound Label                              | m/z      | RT | Algorithm                 | Mass     |
|---------------------------------------------|----------|----|---------------------------|----------|
| Cpd 30: C <sub>26</sub> H <sub>19</sub> N O | 362.1548 | 11 | Find by Molecular Feature | 361.1472 |

#### MFE MS Spectrum



#### MFE MS Zoomed Spectrum



#### MS Spectrum Peak List

| m/z      | z | Abund    | Formula                             | Ion    |
|----------|---|----------|-------------------------------------|--------|
| 362.1548 | 1 | 119343.2 | C <sub>26</sub> H <sub>19</sub> N O | (M+H)+ |
| 363.157  | 1 | 39455.02 | C <sub>26</sub> H <sub>19</sub> N O | (M+H)+ |
| 364.1601 | 1 | 7842.9   | C <sub>26</sub> H <sub>19</sub> N O | (M+H)+ |

--- End Of Report ---

# <sup>1</sup>H NMR



**3-(4-Fluorophenyl)-4-phenylbenzo[*h*]isoquinoline (5c)**



<sup>13</sup>CNMR



3-(4-Fluorophenyl)-4-phenylbenzo[*h*]isoquinoline (5c)



# HRMS



## 3-(4-Fluorophenyl)-4-phenylbenzo[h]isoquinoline (5c)

### Qualitative Compound Report

|                        |              |               |                     |
|------------------------|--------------|---------------|---------------------|
| Data File              | PKM-366.d    | Sample Name   | PKM-366             |
| Sample Type            | Sample       | Position      | P1-B4               |
| Instrument Name        | Instrument 1 | User Name     |                     |
| Acq Method             | Damo JK.m    | Acquired Time | 24-01-2019 15:12:26 |
| IRM Calibration Status | Success      | DA Method     | Default.m           |
| Comment                |              |               |                     |

|                |                             |       |
|----------------|-----------------------------|-------|
| Sample Group   |                             | Info. |
| Acquisition SW | 6200 series TOF/6500 series |       |
| Version        | Q-TOF B.05.01 (B5125.1)     |       |

#### Compound Table

| Compound Label                             | RT    | Mass     | Formula                             | MFG Formula                         | MFG Diff (ppm) | DB Formula                          |
|--------------------------------------------|-------|----------|-------------------------------------|-------------------------------------|----------------|-------------------------------------|
| Cpd 1: C <sub>25</sub> H <sub>16</sub> F N | 0.105 | 349.1276 | C <sub>25</sub> H <sub>16</sub> F N | C <sub>25</sub> H <sub>16</sub> F N | -2.56          | C <sub>25</sub> H <sub>16</sub> F N |

| Compound Label                             | m/z      | RT    | Algorithm                 | Mass     |
|--------------------------------------------|----------|-------|---------------------------|----------|
| Cpd 1: C <sub>25</sub> H <sub>16</sub> F N | 350.1348 | 0.105 | Find by Molecular Feature | 349.1276 |

#### MFE MS Spectrum



#### MFE MS Zoomed Spectrum



#### MS Spectrum Peak List

| m/z      | z | Abund      | Formula                             | Ion    |
|----------|---|------------|-------------------------------------|--------|
| 350.1348 | 1 | 28062752   | C <sub>25</sub> H <sub>16</sub> F N | (M+H)+ |
| 351.1381 | 1 | 7574256.75 | C <sub>25</sub> H <sub>16</sub> F N | (M+H)+ |
| 352.1418 | 1 | 993362.52  | C <sub>25</sub> H <sub>16</sub> F N | (M+H)+ |
| 353.1451 | 1 | 70826.82   | C <sub>25</sub> H <sub>16</sub> F N | (M+H)+ |
| 354.1454 | 1 | 3676.59    | C <sub>25</sub> H <sub>16</sub> F N | (M+H)+ |

— End Of Report —

# <sup>1</sup>H NMR



4-(4-Chlorophenyl)-3-phenylbenzo[*h*]isoquinoline (5d)



<sup>13</sup>C NMR



4-(4-Chlorophenyl)-3-phenylbenzo[*h*]isoquinoline (5d)



# HRMS



## 4-(4-Chlorophenyl)-3-phenylbenzo[h]isoquinoline (5d)

### Qualitative Compound Report

Data File: PKM-364.d  
Sample Type: Sample  
Instrument Name: Instrument 1  
Acq Method: Demo JK.m  
IRM Calibration Status: Success  
Comment:   
Sample Name: PKM-364  
Position: P1-D3  
User Name:   
Acquired Time: 16-10-2018 11:59:37  
DA Method: Default.m

Sample Group: Info.  
Acquisition SW: 6200 series TOF/6500 series  
Version: Q-TOF B.05.01 (B5125.1)

#### Compound Table

| Compound Label                             | RT    | Mass     | Formula                             | MFG Formula                         | MFG Diff (ppm) | DB Formula                          |
|--------------------------------------------|-------|----------|-------------------------------------|-------------------------------------|----------------|-------------------------------------|
| Cpd 3: C <sub>25</sub> H <sub>16</sub> ClN | 0.113 | 365.0983 | C <sub>25</sub> H <sub>16</sub> ClN | C <sub>25</sub> H <sub>16</sub> ClN | -3.31          | C <sub>25</sub> H <sub>16</sub> ClN |

| Compound Label                             | m/z      | RT    | Algorithm                 | Mass     |
|--------------------------------------------|----------|-------|---------------------------|----------|
| Cpd 3: C <sub>25</sub> H <sub>16</sub> ClN | 366.1055 | 0.113 | Find by Molecular Feature | 365.0983 |

#### MFE MS Spectrum



#### MFE MS Zoomed Spectrum



#### MS Spectrum Peak List

| m/z      | z | Abund      | Formula                             | Ion      |
|----------|---|------------|-------------------------------------|----------|
| 366.1055 | 1 | 18108710   | C <sub>25</sub> H <sub>16</sub> ClN | (M+H)+   |
| 367.109  | 1 | 5029462.97 | C <sub>25</sub> H <sub>16</sub> ClN | (M+H)+   |
| 368.1038 | 1 | 6264055.24 | C <sub>25</sub> H <sub>16</sub> ClN | (M+H)+   |
| 369.1067 | 1 | 1699529.02 | C <sub>25</sub> H <sub>16</sub> ClN | (M+H)+   |
| 370.1095 | 1 | 208536.14  | C <sub>25</sub> H <sub>16</sub> ClN | (M+H)+   |
| 371.1119 | 1 | 17859.78   | C <sub>25</sub> H <sub>16</sub> ClN | (M+H)+   |
| 388.0884 | 1 | 22993.06   | C <sub>25</sub> H <sub>16</sub> ClN | (M+Na)+  |
| 389.0939 | 1 | 7054.56    | C <sub>25</sub> H <sub>16</sub> ClN | (M+Na)+  |
| 753.1852 | 1 | 11089.61   |                                     | (2M+Na)+ |
| 755.183  | 1 | 8609.71    |                                     | (2M+Na)+ |

--- End Of Report ---

# <sup>1</sup>H NMR



3-(2-Chlorophenyl)-4-(4-chlorophenyl)benzo[*h*]isoquinoline (5e)



<sup>13</sup>C NMR



**3-(2-Chlorophenyl)-4-(4-chlorophenyl)benzo[*h*]isoquinoline (5e)**



# HRMS



**3-(2-Chlorophenyl)-4-(4-chlorophenyl)benzo[*h*]isoquinoline (5e)**

|               |           |             |           |                 |              |                        |                     |
|---------------|-----------|-------------|-----------|-----------------|--------------|------------------------|---------------------|
| Sample Name   | PKM-365   | Position    | P1-D2     | Instrument Name | Instrument 1 | User Name              |                     |
| Inj Vol       | 1         | InjPosition |           | SampleType      | Sample       | IRM Calibration Status | Success             |
| Data Filename | PKM-365.d | ACQ Method  | Damo JK.m | Comment         |              | Acquired Time          | 16-10-2018 11:57:53 |



# <sup>1</sup>H NMR



4-(4-Chlorophenyl)-3-(3,4,5-trimethoxyphenyl)benzo[*h*]isoquinoline (5f)



# <sup>13</sup>C NMR



**4-(4-Chlorophenyl)-3-(3,4,5-trimethoxyphenyl)benzo[*h*]isoquinoline (5f)**



# HRMS



## 4-(4-Chlorophenyl)-3-(3,4,5-trimethoxyphenyl)benzo[h]isoquinoline (5f)

### Qualitative Compound Report

|                               |              |                      |                     |
|-------------------------------|--------------|----------------------|---------------------|
| <b>Data File</b>              | PKM-373.d    | <b>Sample Name</b>   | PKM-373             |
| <b>Sample Type</b>            | Sample       | <b>Position</b>      | P1-D3               |
| <b>Instrument Name</b>        | Instrument 1 | <b>User Name</b>     |                     |
| <b>Acq Method</b>             | 29.10.2014.m | <b>Acquired Time</b> | 21-03-2017 13:37:48 |
| <b>IRM Calibration Status</b> | Success      | <b>DA Method</b>     | Default.m           |
| <b>Comment</b>                |              |                      |                     |

|                       |                             |              |
|-----------------------|-----------------------------|--------------|
| <b>Sample Group</b>   |                             | <b>Info.</b> |
| <b>Acquisition SW</b> | 6200 series TOF/6500 series |              |
| <b>Version</b>        | Q-TOF B.05.01 (B5125)       |              |

#### Compound Table

| Compound Label         | RT | Mass     | Formula         | MFG Formula     | MFG Diff (ppm) | DB Formula      |
|------------------------|----|----------|-----------------|-----------------|----------------|-----------------|
| Cpd 1: C28 H22 Cl N O3 | 11 | 455.1286 | C28 H22 Cl N O3 | C28 H22 Cl N O3 | 0.58           | C28 H22 Cl N O3 |

| Compound Label         | m/z      | RT | Algorithm                 | Mass     |
|------------------------|----------|----|---------------------------|----------|
| Cpd 1: C28 H22 Cl N O3 | 456.1358 | 11 | Find by Molecular Feature | 455.1286 |

#### MFE MS Spectrum



#### MFE MS Zoomed Spectrum



#### MS Spectrum Peak List

| m/z      | z | Abund      | Formula         | Ion    |
|----------|---|------------|-----------------|--------|
| 456.1358 | 1 | 3424650    | C28 H22 Cl N O3 | (M+H)+ |
| 457.1392 | 1 | 1067413.53 | C28 H22 Cl N O3 | (M+H)+ |
| 458.1343 | 1 | 1244925.13 | C28 H22 Cl N O3 | (M+H)+ |
| 459.1366 | 1 | 349523.75  | C28 H22 Cl N O3 | (M+H)+ |
| 460.139  | 1 | 56482.09   | C28 H22 Cl N O3 | (M+H)+ |
| 461.1416 | 1 | 6401.78    | C28 H22 Cl N O3 | (M+H)+ |
| 462.1454 | 1 | 979.98     | C28 H22 Cl N O3 | (M+H)+ |

--- End Of Report ---

# <sup>1</sup>H NMR



3-Phenyl-4-(thiophen-2-yl)benzo[h]isoquinoline (5g)



<sup>13</sup>C NMR



**3-Phenyl-4-(thiophen-2-yl)benzo[*h*]isoquinoline (5g)**



# HRMS



## 3-Phenyl-4-(thiophen-2-yl)benzo[h]isoquinoline (5g)

Data File PKM-358.d Sample Name PKM-358  
Sample Type Sample Position P1-A5  
Instrument Name Instrument 1 User Name  
Acq Method 29.10.2014.m Acquired Time 12-01-2017 13:59:41  
IRM Calibration Status Success DA Method Default.m  
Comment

Sample Group Info.  
Acquisition SW 6200 series TOF/6500 series  
Version Q-TOF B.05.01 (B5125)

### Compound Table

| Compound Label     | RT | Mass     | Formula     | MFG Formula | MFG Diff (ppm) | DB Formula  |
|--------------------|----|----------|-------------|-------------|----------------|-------------|
| Cpd 1: C23 H15 N S | 11 | 337.0924 | C23 H15 N S | C23 H15 N S | 0.34           | C23 H15 N S |

| Compound Label     | m/z      | RT | Algorithm                 | Mass     |
|--------------------|----------|----|---------------------------|----------|
| Cpd 1: C23 H15 N S | 338.0997 | 11 | Find by Molecular Feature | 337.0924 |

### MFE MS Spectrum



### MFE MS Zoomed Spectrum



### MS Spectrum Peak List

| m/z      | z | Abund      | Formula     | Ion     |
|----------|---|------------|-------------|---------|
| 338.0997 | 1 | 2926790.75 | C23 H15 N S | (M+H)+  |
| 339.1029 | 1 | 769040.64  | C23 H15 N S | (M+H)+  |
| 340.1001 | 1 | 204844.7   | C23 H15 N S | (M+H)+  |
| 341.1004 | 1 | 36677.61   | C23 H15 N S | (M+H)+  |
| 342.1022 | 1 | 4687.63    | C23 H15 N S | (M+H)+  |
| 343.1055 | 1 | 188.79     | C23 H15 N S | (M+H)+  |
| 360.0809 | 1 | 1888.9     | C23 H15 N S | (M+Na)+ |
| 361.0831 | 1 | 614.03     | C23 H15 N S | (M+Na)+ |

--- End Of Report ---

# <sup>1</sup>H NMR



3-(Pyridin-3-yl)-4-(thiophen-2-yl)benzo[h]isoquinoline (5h)



<sup>13</sup>C NMR



**3-(Pyridin-3-yl)-4-(thiophen-2-yl)benzo[*h*]isoquinoline (5h)**



# HRMS



## 3-(Pyridin-3-yl)-4-(thiophen-2-yl)benzo[h]isoquinoline (5h)

### Qualitative Compound Report

|                               |              |                      |                     |
|-------------------------------|--------------|----------------------|---------------------|
| <b>Data File</b>              | PKM-361.d    | <b>Sample Name</b>   | PKM-361             |
| <b>Sample Type</b>            | Sample       | <b>Position</b>      | P1-F2               |
| <b>Instrument Name</b>        | Instrument 1 | <b>User Name</b>     |                     |
| <b>Acq Method</b>             | 29.10.2014.m | <b>Acquired Time</b> | 16-01-2017 12:28:36 |
| <b>IRM Calibration Status</b> | Success      | <b>DA Method</b>     | Default.m           |
| <b>Comment</b>                |              |                      |                     |

|                       |                             |              |
|-----------------------|-----------------------------|--------------|
| <b>Sample Group</b>   |                             | <b>Info.</b> |
| <b>Acquisition SW</b> | 6200 series TOF/6500 series |              |
| <b>Version</b>        | Q-TOF B.05.01 (B5125)       |              |

#### Compound Table

| Compound Label      | RT | Mass     | Formula      | MFG Formula  | MFG Diff (ppm) | DB Formula   |
|---------------------|----|----------|--------------|--------------|----------------|--------------|
| Cpd 1: C22 H14 N2 S | 11 | 338.0874 | C22 H14 N2 S | C22 H14 N2 S | 1.03           | C22 H14 N2 S |

| Compound Label      | m/z      | RT | Algorithm                 | Mass     |
|---------------------|----------|----|---------------------------|----------|
| Cpd 1: C22 H14 N2 S | 339.0947 | 11 | Find by Molecular Feature | 338.0874 |

#### MFE MS Spectrum



#### MFE MS Zoomed Spectrum



#### MS Spectrum Peak List

| m/z      | z | Abund      | Formula      | Ion    |
|----------|---|------------|--------------|--------|
| 339.0947 | 1 | 3310876.75 | C22 H14 N2 S | (M+H)+ |
| 340.0979 | 1 | 833154.32  | C22 H14 N2 S | (M+H)+ |
| 341.0949 | 1 | 220500.78  | C22 H14 N2 S | (M+H)+ |
| 342.0952 | 1 | 38900.19   | C22 H14 N2 S | (M+H)+ |
| 343.0966 | 1 | 5277.47    | C22 H14 N2 S | (M+H)+ |
| 344.0938 | 1 | 809.38     | C22 H14 N2 S | (M+H)+ |

--- End Of Report ---

# <sup>1</sup>H NMR



**3-(Furan-2-yl)-4-(thiophen-2-yl)benzo[*h*]isoquinoline (5i)**



<sup>13</sup>C NMR



3-(Furan-2-yl)-4-(thiophen-2-yl)benzo[*h*]isoquinoline (5i)



# HRMS



## 3-(Furan-2-yl)-4-(thiophen-2-yl)benzo[h]isoquinoline (5i)

### Qualitative Compound Report

|                        |              |               |                     |
|------------------------|--------------|---------------|---------------------|
| Data File              | PKM-360.d    | Sample Name   | PKM-360             |
| Sample Type            | Sample       | Position      | P1-E3               |
| Instrument Name        | Instrument 1 | User Name     |                     |
| Acq Method             | 29.10.2014.m | Acquired Time | 16-01-2017 12:26:43 |
| IRM Calibration Status | Success      | DA Method     | Default.m           |
| Comment                |              |               |                     |

|                |                             |
|----------------|-----------------------------|
| Sample Group   | Info.                       |
| Acquisition SW | 6200 series TOF/6500 series |
| Version        | Q-TOF B.05.01 (B5125)       |

#### Compound Table

| Compound Label                               | RT | Mass     | Formula                               | MFG Formula                           | MFG Diff (ppm) | DB Formula                            |
|----------------------------------------------|----|----------|---------------------------------------|---------------------------------------|----------------|---------------------------------------|
| Cpd 1: C <sub>21</sub> H <sub>13</sub> N O S | 11 | 327.0717 | C <sub>21</sub> H <sub>13</sub> N O S | C <sub>21</sub> H <sub>13</sub> N O S | 0.19           | C <sub>21</sub> H <sub>13</sub> N O S |

| Compound Label                               | m/z     | RT | Algorithm                 | Mass     |
|----------------------------------------------|---------|----|---------------------------|----------|
| Cpd 1: C <sub>21</sub> H <sub>13</sub> N O S | 328.079 | 11 | Find by Molecular Feature | 327.0717 |

#### MFE MS Spectrum



#### MFE MS Zoomed Spectrum



#### MS Spectrum Peak List

| m/z      | z | Abund     | Formula                               | Ion     |
|----------|---|-----------|---------------------------------------|---------|
| 328.079  | 1 | 3502526   | C <sub>21</sub> H <sub>13</sub> N O S | (M+H)+  |
| 329.0823 | 1 | 840740.84 | C <sub>21</sub> H <sub>13</sub> N O S | (M+H)+  |
| 330.079  | 1 | 231453.04 | C <sub>21</sub> H <sub>13</sub> N O S | (M+H)+  |
| 331.0794 | 1 | 39227.71  | C <sub>21</sub> H <sub>13</sub> N O S | (M+H)+  |
| 332.0817 | 1 | 5328.02   | C <sub>21</sub> H <sub>13</sub> N O S | (M+H)+  |
| 333.0854 | 1 | 427.67    | C <sub>21</sub> H <sub>13</sub> N O S | (M+H)+  |
| 350.0607 | 1 | 11551.01  | C <sub>21</sub> H <sub>13</sub> N O S | (M+Na)+ |
| 351.0635 | 1 | 2923.2    | C <sub>21</sub> H <sub>13</sub> N O S | (M+Na)+ |
| 352.0655 | 1 | 892.46    | C <sub>21</sub> H <sub>13</sub> N O S | (M+Na)+ |
| 366.0348 | 1 | 794.54    | C <sub>21</sub> H <sub>13</sub> N O S | (M+K)+  |

--- End Of Report ---

# <sup>1</sup>H NMR



3,4-Di(thiophen-2-yl)benzo[*h*]isoquinoline (5j)



<sup>13</sup>C NMR



3,4-Di(thiophen-2-yl)benzo[*h*]isoquinoline (5j)



# HRMS



## 3,4-Di(thiophen-2-yl)benzo[h]isoquinoline (5j)

### Qualitative Compound Report

Data File: PKM-359.d  
Sample Type: Sample  
Instrument Name: Instrument 1  
Acq Method: 29.10.2014.m  
IRM Calibration Status: Success  
Comment:  
Sample Name: PKM-359  
Position: P1-F1  
User Name:  
Acquired Time: 16-01-2017 12:18:07  
DA Method: Default.m

Sample Group:  
Acquisition SW: 6200 series TOF/6500 series  
Version: Q-TOF B.05.01 (B5125)  
Info:

#### Compound Table

| Compound Label      | RT | Mass     | Formula      | MFG Formula  | MFG Diff (ppm) | DB Formula   |
|---------------------|----|----------|--------------|--------------|----------------|--------------|
| Cpd 2: C21 H13 N S2 | 10 | 343.0489 | C21 H13 N S2 | C21 H13 N S2 | 0.22           | C21 H13 N S2 |

| Compound Label      | m/z      | RT | Algorithm                 | Mass     |
|---------------------|----------|----|---------------------------|----------|
| Cpd 2: C21 H13 N S2 | 344.0562 | 10 | Find by Molecular Feature | 343.0489 |

#### MFE MS Spectrum



#### MFE MS Zoomed Spectrum



#### MS Spectrum Peak List

| m/z      | z | Abund      | Formula      | Ion    |
|----------|---|------------|--------------|--------|
| 344.0562 | 1 | 1726658.13 | C21 H13 N S2 | (M+H)+ |
| 345.0591 | 1 | 418254.05  | C21 H13 N S2 | (M+H)+ |
| 346.0543 | 1 | 183288.54  | C21 H13 N S2 | (M+H)+ |
| 347.0556 | 1 | 35951.46   | C21 H13 N S2 | (M+H)+ |
| 348.0535 | 1 | 7071.59    | C21 H13 N S2 | (M+H)+ |
| 349.0556 | 1 | 1351.78    | C21 H13 N S2 | (M+H)+ |

--- End Of Report ---

# **H NMR**



**3-Ethynyl-4-phenylisoquinoline (6a)**



**<sup>13</sup>C NMR**



**3-Ethynyl-4-phenylisoquinoline (6a)**



# HRMS



## 3-Ethynyl-4-phenylisoquinoline (6a)

### Qualitative Compound Report

|                               |              |                      |                     |
|-------------------------------|--------------|----------------------|---------------------|
| <b>Data File</b>              | PKM-378.d    | <b>Sample Name</b>   | PKM-378             |
| <b>Sample Type</b>            | Sample       | <b>Position</b>      | P1-F2               |
| <b>Instrument Name</b>        | Instrument 1 | <b>User Name</b>     |                     |
| <b>Acq Method</b>             | 29.10.2014.m | <b>Acquired Time</b> | 06-03-2017 14:23:33 |
| <b>IRM Calibration Status</b> | Success      | <b>DA Method</b>     | Default.m           |
| <b>Comment</b>                |              |                      |                     |

|                       |                             |              |
|-----------------------|-----------------------------|--------------|
| <b>Sample Group</b>   |                             | <b>Info.</b> |
| <b>Acquisition SW</b> | 6200 series TOF/6500 series |              |
| <b>Version</b>        | Q-TOF B.05.01 (B5125)       |              |

#### Compound Table

| Compound Label   | RT | Mass     | Formula   | MFG Formula | MFG Diff (ppm) | DB Formula |
|------------------|----|----------|-----------|-------------|----------------|------------|
| Cpd 5: C17 H11 N | 10 | 229.0905 | C17 H11 N | C17 H11 N   | -5.89          | C17 H11 N  |

| Compound Label   | m/z      | RT | Algorithm                 | Mass     |
|------------------|----------|----|---------------------------|----------|
| Cpd 5: C17 H11 N | 230.0978 | 10 | Find by Molecular Feature | 229.0905 |

#### MFE MS Spectrum



#### MFE MS Zoomed Spectrum



#### MS Spectrum Peak List

| m/z      | z | Abund     | Formula   | Ion     |
|----------|---|-----------|-----------|---------|
| 230.0978 | 1 | 2571670.5 | C17 H11 N | (M+H)+  |
| 231.101  | 1 | 475478.99 | C17 H11 N | (M+H)+  |
| 232.1042 | 1 | 40900.83  | C17 H11 N | (M+H)+  |
| 459.1924 | 1 | 1416.1    |           | (2M+H)+ |

--- End Of Report ---

# <sup>1</sup>H NMR



7-Bromo-3-ethynyl-4-phenylisoquinoline (6b)



# <sup>13</sup>C NMR



7-Bromo-3-ethynyl-4-phenylisoquinoline (6b)



# HRMS



## 7-Bromo-3-ethynyl-4-phenylisoquinoline (6b)

### Qualitative Compound Report

Data File: PKM-377BR.d  
Sample Type: Sample  
Instrument Name: Instrument 1  
Acq Method: Demo JK.m  
IRM Calibration Status: Successful  
Comment:  
Sample Name: PKM-377BR  
Position: P1-A8  
User Name:  
Acquired Time: 22-01-2019 15:11:10  
DA Method: Default.m

Sample Group:  
Acquisition SW: 6200 series TOF/6500 series  
Version: Q-TOF B.05.01 (B5125.1)  
Info:

#### Compound Table

| Compound Label      | RT    | Mass     | Formula      | MFG Formula  | MFG Diff (ppm) | DB Formula   |
|---------------------|-------|----------|--------------|--------------|----------------|--------------|
| Cpd 9: C17 H10 Br N | 0.139 | 307.0011 | C17 H10 Br N | C17 H10 Br N | -4.55          | C17 H10 Br N |

| Compound Label      | m/z      | RT    | Algorithm                 | Mass     |
|---------------------|----------|-------|---------------------------|----------|
| Cpd 9: C17 H10 Br N | 308.0083 | 0.139 | Find by Molecular Feature | 307.0011 |

#### MFE MS Spectrum



#### MFE MS Zoomed Spectrum



#### MS Spectrum Peak List

| m/z      | z | Abund       | Formula      | Ion    |
|----------|---|-------------|--------------|--------|
| 308.0083 | 1 | 19205201.68 | C17 H10 Br N | (M+H)+ |
| 309.0116 | 1 | 3771751.3   | C17 H10 Br N | (M+H)+ |
| 310.0065 | 1 | 19227242    | C17 H10 Br N | (M+H)+ |
| 311.0096 | 1 | 3694449.07  | C17 H10 Br N | (M+H)+ |
| 312.013  | 1 | 298592.62   | C17 H10 Br N | (M+H)+ |
| 313.0164 | 1 | 6025.36     | C17 H10 Br N | (M+H)+ |
| 314.018  | 1 | 2612.84     | C17 H10 Br N | (M+H)+ |

--- End Of Report ---

# <sup>1</sup>H NMR



4-phenyl-3-vinylisoquinoline (6c)



<sup>13</sup>C NMR



4-phenyl-3-vinylisoquinoline (6c).





## Qualitative Compound Report

|                       |                             |              |
|-----------------------|-----------------------------|--------------|
| <b>Sample Group</b>   |                             | <b>Info.</b> |
| <b>Acquisition SW</b> | 6200 series TOF/6500 series |              |
| <b>Version</b>        | Q-TOF B.05.01 (B5125.1)     |              |

| Compound Label   | RT    | Mass     | Formula   | MFG Formula | MFG Diff (ppm) | DB Formula |
|------------------|-------|----------|-----------|-------------|----------------|------------|
| Cpd 1: C17 H13 N | 0.098 | 231.1055 | C17 H13 N | C17 H13 N   | -3.2           | C17 H13 N  |

MFE MS Spectrum



--- End Of Report ---

# <sup>1</sup>H NMR



**1,4-Bis(4-phenylisoquinolin-3-yl)benzene (7a)**



**$^{13}\text{C}$  NMR**



**1,4-Bis(4-phenylisoquinolin-3-yl)benzene (7a)**



# HRMS



## 1,4-Bis(4-phenylisoquinolin-3-yl)benzene (7a)

### Qualitative Compound Report

Data File SV-93.d Sample Name SV-93  
Sample Type Sample Position P1-C1  
Instrument Name Instrument 1 User Name  
Acq Method 29.10.2014.m Acquired Time 05-09-2016 15:02:01  
IRM Calibration Status Success DA Method Default.m  
Comment

Sample Group Info.  
Acquisition SW 6200 series TOF/6500 series  
Version Q-TOF B.05.01 (B5125)

#### Compound Table

| Compound Label     | RT | Mass     | Formula    | MFG Formula | MFG Diff (ppm) | DB Formula |
|--------------------|----|----------|------------|-------------|----------------|------------|
| Cpd 10: C36 H24 N2 | 10 | 484.1906 | C36 H24 N2 | C36 H24 N2  | 6.95           | C36 H24 N2 |

| Compound Label     | m/z      | RT | Algorithm                 | Mass     |
|--------------------|----------|----|---------------------------|----------|
| Cpd 10: C36 H24 N2 | 485.1978 | 10 | Find by Molecular Feature | 484.1906 |

#### MFE MS Spectrum



#### MFE MS Zoomed Spectrum



#### MS Spectrum Peak List

| m/z      | z | Abund     | Formula    | Ion      |
|----------|---|-----------|------------|----------|
| 243.1025 | 2 | 98326.54  | C36 H24 N2 | (M+2H)+2 |
| 243.6042 | 2 | 39769.23  | C36 H24 N2 | (M+2H)+2 |
| 244.1063 | 2 | 8276.23   | C36 H24 N2 | (M+2H)+2 |
| 244.6091 | 2 | 875.29    | C36 H24 N2 | (M+2H)+2 |
| 485.1978 | 1 | 350431.31 | C36 H24 N2 | (M+H)+   |
| 486.2008 | 1 | 133710.46 | C36 H24 N2 | (M+H)+   |
| 487.2036 | 1 | 24997.71  | C36 H24 N2 | (M+H)+   |
| 488.2073 | 1 | 3579.07   | C36 H24 N2 | (M+H)+   |

--- End Of Report ---

# <sup>1</sup>H NMR



1,4-Bis(7-bromo-4-phenylisoquinolin-3-yl)benzene (7b)



# <sup>13</sup>C NMR



1,4-Bis(7-bromo-4-phenylisoquinolin-3-yl)benzene (7b)



# HRMS



**1,4-Bis(7-bromo-4-phenylisoquinolin-3-yl)benzene (7b)**



<sup>1</sup>H NMR



1,3-Bis(4-phenylisoquinolin-3-yl)benzene (7c)



<sup>13</sup>C NMR



**1,3-Bis(4-phenylisoquinolin-3-yl)benzene (7c)**



# HRMS



## 1,3-Bis(4-phenylisoquinolin-3-yl)benzene (7c)

### Qualitative Compound Report

|                        |              |               |                     |
|------------------------|--------------|---------------|---------------------|
| Data File              | SV-93.d      | Sample Name   | SV-93               |
| Sample Type            | Sample       | Position      | P1-C1               |
| Instrument Name        | Instrument 1 | User Name     |                     |
| Acq Method             | 29.10.2014.m | Acquired Time | 05-09-2016 15:02:01 |
| IRM Calibration Status | Success      | DA Method     | Default.m           |
| Comment                |              |               |                     |

|                |                             |       |
|----------------|-----------------------------|-------|
| Sample Group   |                             | Info. |
| Acquisition SW | 6200 series TOF/6500 series |       |
| Version        | Q-TOF 8.05.01 (B5125)       |       |

#### Compound Table

| Compound Label     | RT | Mass     | Formula    | MFG Formula | MFG Diff (ppm) | DB Formula |
|--------------------|----|----------|------------|-------------|----------------|------------|
| Cpd 10: C36 H24 N2 | 10 | 484.1906 | C36 H24 N2 | C36 H24 N2  | 6.95           | C36 H24 N2 |

| Compound Label     | m/z      | RT | Algorithm                 | Mass     |
|--------------------|----------|----|---------------------------|----------|
| Cpd 10: C36 H24 N2 | 485.1978 | 10 | Find by Molecular Feature | 484.1906 |

#### MFE MS Spectrum



#### MFE MS Zoomed Spectrum



#### MS Spectrum Peak List

| m/z      | z | Abund     | Formula    | Ion      |
|----------|---|-----------|------------|----------|
| 243.1025 | 2 | 98326.54  | C36 H24 N2 | (M+2H)+2 |
| 243.6042 | 2 | 39769.23  | C36 H24 N2 | (M+2H)+2 |
| 244.1063 | 2 | 8276.23   | C36 H24 N2 | (M+2H)+2 |
| 244.6091 | 2 | 875.29    | C36 H24 N2 | (M+2H)+2 |
| 485.1978 | 1 | 350431.31 | C36 H24 N2 | (M+H)+   |
| 486.2008 | 1 | 133710.46 | C36 H24 N2 | (M+H)+   |
| 487.2036 | 1 | 24997.71  | C36 H24 N2 | (M+H)+   |
| 488.2073 | 1 | 3579.07   | C36 H24 N2 | (M+H)+   |

--- End Of Report ---

# <sup>1</sup>H NMR



**1,3-Bis(7-chloro-4-phenylisoquinolin-3-yl)benzene (7d)**



<sup>13</sup>C NMR



**1,3-Bis(7-chloro-4-phenylisoquinolin-3-yl)benzene (7d)**



# HRMS



## 1,3-Bis(7-chloro-4-phenylisoquinolin-3-yl)benzene (7d)

### Qualitative Compound Report

|                        |              |               |                     |
|------------------------|--------------|---------------|---------------------|
| Data File              | PKM-315.d    | Sample Name   | PKM-315             |
| Sample Type            | Sample       | Position      | P1-C3               |
| Instrument Name        | Instrument 1 | User Name     |                     |
| Acq Method             | 29.10.2014.m | Acquired Time | 20-10-2016 14:36:41 |
| IRM Calibration Status | Success      | DA Method     | Default.m           |
| Comment                |              |               |                     |

|                |                             |
|----------------|-----------------------------|
| Sample Group   | Info.                       |
| Acquisition SW | 6200 series TOF/6500 series |
| Version        | Q-TOF B.05.01 (B5125)       |

#### Compound Table

| Compound Label                                                        | RT | Mass     | Formula                                                        | MFG Formula                                                    | MFG Diff (ppm) | DB Formula                                                     |
|-----------------------------------------------------------------------|----|----------|----------------------------------------------------------------|----------------------------------------------------------------|----------------|----------------------------------------------------------------|
| Cpd 5: C <sub>36</sub> H <sub>22</sub> Cl <sub>2</sub> N <sub>2</sub> | 12 | 552.1162 | C <sub>36</sub> H <sub>22</sub> Cl <sub>2</sub> N <sub>2</sub> | C <sub>36</sub> H <sub>22</sub> Cl <sub>2</sub> N <sub>2</sub> | -0.38          | C <sub>36</sub> H <sub>22</sub> Cl <sub>2</sub> N <sub>2</sub> |

| Compound Label                                                        | m/z      | RT | Algorithm                 | Mass     |
|-----------------------------------------------------------------------|----------|----|---------------------------|----------|
| Cpd 5: C <sub>36</sub> H <sub>22</sub> Cl <sub>2</sub> N <sub>2</sub> | 553.1244 | 12 | Find by Molecular Feature | 552.1162 |

#### MFE MS Spectrum



#### MFE MS Zoomed Spectrum



#### MS Spectrum Peak List

| m/z      | z | Abund     | Formula                                                        | Ion      |
|----------|---|-----------|----------------------------------------------------------------|----------|
| 277.0653 | 2 | 10583.38  | C <sub>36</sub> H <sub>22</sub> Cl <sub>2</sub> N <sub>2</sub> | (M+2H)+2 |
| 277.567  | 2 | 4197.9    | C <sub>36</sub> H <sub>22</sub> Cl <sub>2</sub> N <sub>2</sub> | (M+2H)+2 |
| 278.0641 | 2 | 7591.9    | C <sub>36</sub> H <sub>22</sub> Cl <sub>2</sub> N <sub>2</sub> | (M+2H)+2 |
| 553.1244 | 1 | 597217.38 | C <sub>36</sub> H <sub>22</sub> Cl <sub>2</sub> N <sub>2</sub> | (M+H)+   |
| 554.1276 | 1 | 226422.32 | C <sub>36</sub> H <sub>22</sub> Cl <sub>2</sub> N <sub>2</sub> | (M+H)+   |
| 555.1225 | 1 | 413063.39 | C <sub>36</sub> H <sub>22</sub> Cl <sub>2</sub> N <sub>2</sub> | (M+H)+   |
| 556.1248 | 1 | 146345.85 | C <sub>36</sub> H <sub>22</sub> Cl <sub>2</sub> N <sub>2</sub> | (M+H)+   |
| 557.1212 | 1 | 81107.79  | C <sub>36</sub> H <sub>22</sub> Cl <sub>2</sub> N <sub>2</sub> | (M+H)+   |
| 558.1224 | 1 | 24262.44  | C <sub>36</sub> H <sub>22</sub> Cl <sub>2</sub> N <sub>2</sub> | (M+H)+   |
| 559.1277 | 1 | 6864.73   | C <sub>36</sub> H <sub>22</sub> Cl <sub>2</sub> N <sub>2</sub> | (M+H)+   |

--- End Of Report ---

# <sup>1</sup>H NMR



1,3-Bis(4-(thiophen-2-yl)isoquinolin-3-yl)benzene (7e)



<sup>13</sup>C NMR



**1,3-Bis(4-(thiophen-2-yl)isoquinolin-3-yl)benzene (7e)**



# HRMS



**1,3-Bis(4-(thiophen-2-yl)isoquinolin-3-yl)benzene (7e)**



# <sup>1</sup>H NMR



(E)-3-(2-(1*H*-indol-1-yl)vinyl)-7-bromo-4-phenylisoquinoline (8a)



<sup>13</sup>C NMR



(E)-3-(2-(1*H*-indol-1-yl)vinyl)-7-bromo-4-phenylisoquinoline (8a)



# HRMS



## (E)-3-(2-(1H-indol-1-yl)vinyl)-7-bromo-4-phenylisoquinoline (8a)

|                               |              |                      |                     |
|-------------------------------|--------------|----------------------|---------------------|
| <b>Data File</b>              | PKM-380.d    | <b>Sample Name</b>   | PKM-380             |
| <b>Sample Type</b>            | Sample       | <b>Position</b>      | P1-B1               |
| <b>Instrument Name</b>        | Instrument 1 | <b>User Name</b>     |                     |
| <b>Acq Method</b>             | 29.10.2014.m | <b>Acquired Time</b> | 07-03-2017 14:11:05 |
| <b>IRM Calibration Status</b> | Success      | <b>DA Method</b>     | Default.m           |
| <b>Comment</b>                |              |                      |                     |

|                       |                             |              |
|-----------------------|-----------------------------|--------------|
| <b>Sample Group</b>   |                             | <b>Info.</b> |
| <b>Acquisition SW</b> | 6200 series TOF/6500 series |              |
| <b>Version</b>        | Q-TOF B.05.01 (B5125)       |              |

Compound Table

| Compound Label        | RT | Mass    | Formula       | MFG Formula   | MFG Diff (ppm) | DB Formula    |
|-----------------------|----|---------|---------------|---------------|----------------|---------------|
| Cpd 10: C25 H17 Br N2 | 11 | 424.059 | C25 H17 Br N2 | C25 H17 Br N2 | -3.63          | C25 H17 Br N2 |

| Compound Label        | m/z      | RT | Algorithm                 | Mass    |
|-----------------------|----------|----|---------------------------|---------|
| Cpd 10: C25 H17 Br N2 | 425.0664 | 11 | Find by Molecular Feature | 424.059 |

MFE MS Spectrum



MFE MS Zoomed Spectrum



MS Spectrum Peak List

| m/z      | z | Abund     | Formula       | Ion     |
|----------|---|-----------|---------------|---------|
| 425.0664 | 1 | 600523.34 | C25 H17 Br N2 | (M+H)+  |
| 426.0693 | 1 | 157933.2  | C25 H17 Br N2 | (M+H)+  |
| 427.0646 | 1 | 603545.81 | C25 H17 Br N2 | (M+H)+  |
| 428.0675 | 1 | 152509.61 | C25 H17 Br N2 | (M+H)+  |
| 429.0707 | 1 | 19908.03  | C25 H17 Br N2 | (M+H)+  |
| 430.073  | 1 | 2041.93   | C25 H17 Br N2 | (M+H)+  |
| 431.0778 | 1 | 235.77    | C25 H17 Br N2 | (M+H)+  |
| 849.1229 | 1 | 272.22    |               | (2M+H)+ |

--- End Of Report ---

<sup>1</sup>H NMR



4-Phenyl-3-(*m*-tolylethynyl)isoquinoline (8b)



<sup>13</sup>C NMR



**4-Phenyl-3-(*m*-tolylethynyl)isoquinoline (8b)**



# HRMS



## 4-Phenyl-3-(*m*-tolylethynyl)isoquinoline (8b)

### Qualitative Compound Report

|                               |              |                      |                     |
|-------------------------------|--------------|----------------------|---------------------|
| <b>Data File</b>              | SV-263.d     | <b>Sample Name</b>   | SV-263              |
| <b>Sample Type</b>            | Sample       | <b>Position</b>      | P1-A4               |
| <b>Instrument Name</b>        | Instrument 1 | <b>User Name</b>     |                     |
| <b>Acq Method</b>             | 29.10.2014.m | <b>Acquired Time</b> | 07-03-2017 14:08:13 |
| <b>IRM Calibration Status</b> | Success      | <b>DA Method</b>     | Default.m           |
| <b>Comment</b>                |              |                      |                     |

|                       |                             |              |
|-----------------------|-----------------------------|--------------|
| <b>Sample Group</b>   |                             | <b>Info.</b> |
| <b>Acquisition SW</b> | 6200 series TOF/6500 series |              |
| <b>Version</b>        | Q-TOF B.05.01 (B5125)       |              |

#### Compound Table

| Compound Label                           | RT | Mass     | Formula                           | MFG Formula                       | MFG Diff (ppm) | DB Formula                        |
|------------------------------------------|----|----------|-----------------------------------|-----------------------------------|----------------|-----------------------------------|
| Cpd 3: C <sub>24</sub> H <sub>17</sub> N | 11 | 319.1384 | C <sub>24</sub> H <sub>17</sub> N | C <sub>24</sub> H <sub>17</sub> N | -7.07          | C <sub>24</sub> H <sub>17</sub> N |

| Compound Label                           | <i>m/z</i> | RT | Algorithm                 | Mass     |
|------------------------------------------|------------|----|---------------------------|----------|
| Cpd 3: C <sub>24</sub> H <sub>17</sub> N | 320.1456   | 11 | Find by Molecular Feature | 319.1384 |

#### MFE MS Spectrum



#### MFE MS Zoomed Spectrum



#### MS Spectrum Peak List

| <i>m/z</i> | <i>z</i> | Abund      | Formula                           | Ion     |
|------------|----------|------------|-----------------------------------|---------|
| 320.1456   | 1        | 3288879.25 | C <sub>24</sub> H <sub>17</sub> N | (M+H)+  |
| 321.149    | 1        | 855663.23  | C <sub>24</sub> H <sub>17</sub> N | (M+H)+  |
| 322.1528   | 1        | 107965.53  | C <sub>24</sub> H <sub>17</sub> N | (M+H)+  |
| 323.1579   | 1        | 10492.78   | C <sub>24</sub> H <sub>17</sub> N | (M+H)+  |
| 342.1273   | 1        | 11094      | C <sub>24</sub> H <sub>17</sub> N | (M+Na)+ |
| 358.1015   | 1        | 12219.15   | C <sub>24</sub> H <sub>17</sub> N | (M+K)+  |
| 639.2819   | 1        | 153566.42  | C <sub>24</sub> H <sub>17</sub> N | (2M+H)+ |
| 640.2848   | 1        | 79404.07   | C <sub>24</sub> H <sub>17</sub> N | (2M+H)+ |
| 641.2881   | 1        | 20301.14   | C <sub>24</sub> H <sub>17</sub> N | (2M+H)+ |
| 642.2922   | 1        | 3554.56    | C <sub>24</sub> H <sub>17</sub> N | (2M+H)+ |

--- End Of Report ---

<sup>1</sup>H NMR



2-Butyl-3-phenylisoindolin-1-one (9)



<sup>13</sup>C NMR



2-Butyl-3-phenylisoindolin-1-one (9)



# HRMS



## 2-Butyl-3-phenylisoindolin-1-one (9)

### Qualitative Compound Report

Data File PKM-337.d Sample Name PKM-337  
Sample Type Sample Position P1-B4  
Instrument Name Instrument 1 User Name  
Acq Method Demo JK.m Acquired Time 22-01-2019 14:04:39  
IRM Calibration Status Success DA Method Default.m  
Comment

Sample Group Info.  
Acquisition SW 6200 series TOF/6500 series  
Version Q-TOF B.05.01 (B5125.1)

#### Compound Table

| Compound Label     | RT    | Mass     | Formula     | MFG Formula | MFG Diff (ppm) | DB Formula  |
|--------------------|-------|----------|-------------|-------------|----------------|-------------|
| Cpd 7: C18 H19 N O | 0.107 | 265.1479 | C18 H19 N O | C18 H19 N O | -4.74          | C18 H19 N O |

| Compound Label     | m/z      | RT    | Algorithm                 | Mass     |
|--------------------|----------|-------|---------------------------|----------|
| Cpd 7: C18 H19 N O | 531.3019 | 0.107 | Find by Molecular Feature | 265.1479 |

#### MFE MS Spectrum



#### MFE MS Zoomed Spectrum



#### MS Spectrum Peak List

| m/z      | z | Abund      | Formula     | Ion      |
|----------|---|------------|-------------|----------|
| 266.1551 | 1 | 23028038   | C18 H19 N O | (M+H)+   |
| 267.1585 | 1 | 4610547.82 | C18 H19 N O | (M+H)+   |
| 268.1618 | 1 | 487877.94  | C18 H19 N O | (M+H)+   |
| 531.3019 | 1 | 23935440   | C18 H19 N O | (2M+H)+  |
| 532.305  | 1 | 9877096.54 | C18 H19 N O | (2M+H)+  |
| 533.3085 | 1 | 2000143.68 | C18 H19 N O | (2M+H)+  |
| 534.3117 | 1 | 282544.01  | C18 H19 N O | (2M+H)+  |
| 553.284  | 1 | 4420777    | C18 H19 N O | (2M+Na)+ |
| 554.2875 | 1 | 1795678.3  | C18 H19 N O | (2M+Na)+ |
| 555.2913 | 1 | 382005.38  | C18 H19 N O | (2M+Na)+ |

--- End Of Report ---

Cc1c(=O)n(Cc2ccccc2)c3ccccc13

<sup>13</sup>C NMR



2-Benzyl-3-methylisoindolin-1-one (10)



# HRMS



## 2-Benzyl-3-methylisoindolin-1-one (10)

### Qualitative Compound Report

|                        |                                   |               |             |
|------------------------|-----------------------------------|---------------|-------------|
| Data File              | PKM-265A.d                        | Sample Name   | Unavailable |
| Sample Type            | Unavailable                       | Position      | Unavailable |
| Instrument Name        | Unavailable                       | User Name     | Unavailable |
| Acq Method             |                                   | Acquired Time | Unavailable |
| IRM Calibration Status | Success                           | DA Method     | Default.m   |
| Comment                | Sample information is unavailable |               |             |

#### Compound Table

| Compound Label | RT    | Mass     | MFG Formula |
|----------------|-------|----------|-------------|
| Cpd 40: 0.122  | 0.122 | 237.1298 | <none>      |

| Compound Label | m/z      | RT    | Algorithm                 | Mass     |
|----------------|----------|-------|---------------------------|----------|
| Cpd 40: 0.122  | 238.1371 | 0.122 | Find by Molecular Feature | 237.1298 |

#### MFE MS Spectrum



#### MFE MS Zoomed Spectrum



#### MS Spectrum Peak List

| m/z      | z | Abund     | Ion    |
|----------|---|-----------|--------|
| 238.1371 | 1 | 2565665   | (M+H)+ |
| 239.1285 | 1 | 430421.54 | (M+H)+ |
| 240.13   | 1 | 43642.64  | (M+H)+ |
| 241.1317 | 1 | 1069.11   | (M+H)+ |

--- End Of Report ---
